# Nonlinear Dispersive Cell Model for Microdosimetry of Nanosecond Pulsed Electric Fields

1

2

3

4

## Nonlinear Dispersive Cell Model for Microdosimetry of

5

## Nanosecond Pulsed Electric Fields

6

7

8

Fei Guo\*, Lin Zhang, Xin Liu

9

10 The Chongqing key Laboratory of Complex Systems and Bionic Control, Chongqing

11 University of Posts and Telecommunications. Chongqing, China

12

13

14 \*Corresponding author

15 E-mail: [guofei@cqupt.edu.cn](mailto:guofei@cqupt.edu.cn).

# Nonlinear Dispersive Cell Model for Microdosimetry of Nanosecond Pulsed Electric Fields

## 16 **Abstract**

17 For nanosecond pulsed electric fields (nsPEFs) based application, the underlying  
18 transmembrane potential (TMP) distribution of the plasma membrane is influenced by  
19 electroporation (EP) of the plasma membrane and dispersion (DP) of all cell  
20 compartments and is important for predicting the bioelectric effects. In this study, we  
21 analysed temporal and spatial distribution of TMP induced by nsPEFs of various  
22 durations (3 ns, 5 ns unipolar, 5 ns bipolar, and 10 ns) with the consideration of both DP  
23 and EP. Based on the double-shelled dielectric spherical cell model, we used second-order  
24 Debye equation to characterize the dielectric relaxation of plasma membrane and nuclear  
25 membrane in the frequency domain and transformed the Debye equation into the time  
26 domain with the introduction of polarization vector, then we obtained the time course of  
27 TMP by solving the combination of Laplace equation and time-domain Debye equation.  
28 Next, we used the asymptotic version of the smoluchowski equation to characterize  
29 electroporation of plasma membrane and added it to our model to achieve the temporal  
30 and spatial distribution of TMP and pore density. Much faster and more pronounced  
31 increased in TMP can be found with the consideration of dielectric relaxation of plasma  
32 membrane and nuclear membrane, and much larger electroporated area of at least half of  
33 the plasma membrane was obtained with the consideration of both DP and EP. Through  
34 the simulation it is clearer to understand the relationship.

35

## 36 **Introduction**

## Nonlinear Dispersive Cell Model for Microdosimetry of Nanosecond Pulsed Electric Fields

37 Transmembrane potential (TMP) appears on the plasma membrane when a  
38 biological cell is exposed to external electric fields. If the external field intensity is strong,  
39 TMP will exceed the physiological range of the potential on the plasma membrane  
40 (0.4-1V). In this situation, micro-pores occur on the membrane, and this phenomenon is  
41 called electroporation (EP) [1-2]. EP has become a common method for gene transfection,  
42 drug delivery, and been studying for cancer treatment [3-6].

43 Typically, EP uses pulse electric fields with the field intensity of several kV/cm and  
44 the duration in the level of several hundred of microseconds to several milliseconds [1-3].  
45 Recently, electric pulses with the field intensity of several tens of kV/cm and duration in  
46 the level of nanoseconds have been regarded as a drug free, non-thermal way to address  
47 cancer diseases [7-10]. Both model evidences and experimental results indicate that  
48 nsPEFs induce structural and functional changes of intracellular organelles, which is  
49 different from traditional electroporation [11-15]. Compare with conventional EP, much  
50 more numerous, but smaller-sized pores are created in almost all regions of the plasma  
51 membrane with the application of intense nsPEFs [16], which induced a significant  
52 increase in conductivity of the plasma membrane during and after nsPEFs exposure  
53 [17-18], the appearance of massive micro-pore and secondary effects are closely related to  
54 the distribution of TMP of plasma membrane, therefore, accurately calculation of TMP of  
55 plasma membrane plays a critical role in predicting the desired biological effects [19-20].

56 However, it is difficult to directly observe the changes of TMP on the plasma  
57 membrane in real-time during nsPEFs exposure. The study of the relationship between

## Nonlinear Dispersive Cell Model for Microdosimetry of Nanosecond Pulsed Electric Fields

58 nsPEFs and TMP commonly relies on theoretical analysis. In previous theoretical studies,  
59 two effects that were always ignored can greatly affect the temporal and spatial  
60 distribution of TMP when application of nsPEFs to biological cells: 1) dielectric  
61 dispersion (DP), conductivity and permittivity of each component of a biological cell is  
62 frequency-dependent, in consequences TMP of a biological cell depends on frequency  
63 spectrum of the applied nsPEFs [20-24]; 2) electroporation, micro-pores occurred on the  
64 plasma membrane greatly increases its conductivity, then the distribution of TMP will be  
65 changed [25-28]. Smoluchowski equation was used to investigate the creation and  
66 development of micro-pores on the plasma membrane in previous studies when studying  
67 the effect of electroporation on TMP of a biological cell [28]. The effects of dielectric  
68 dispersion of cell components on the TMP of plasma membrane were investigated both in  
69 the time and frequency domain [20, 22-25]. To the best of our knowledge, few studies  
70 have investigated the effects of both DP and EP on the temporal and spatial distribution of  
71 TMP of plasma membrane. A quasi-static solution based on Laplace equation was  
72 adapted to nsPEFs and the electric solution then was coupled with an asymptotic  
73 electroporation model to investigate the effects of both EP and DP in [22], the calculation  
74 involved a two-step process and cannot obtain the effects of both EP and DP on TMP  
75 simultaneously. Joshi and colleagues presented the time-dependent transmembrane  
76 potential at the outer cell membrane with the consideration of both EP and DP, based on  
77 the numerical distribution circuit approach [24]. In [25], Salimi and colleagues  
78 investigated membrane dielectric dispersion in nanosecond pulsed electroporation of

## Nonlinear Dispersive Cell Model for Microdosimetry of Nanosecond Pulsed Electric Fields

79 biological cells, based on the single-shelled cell model.

80 An improved method based on [25], both DP and EP can be easily investigated  
81 simultaneously with the introduction of polarization vector, which is very convenient for  
82 us to investigate the temporal and spatial distribution of TMP based on the double-shelled  
83 cell model, is presented in this study.

84

## 85 **Materials and methods**

86 In Section II -A, the dielectric double-shelled cell model and cell geometric  
87 characteristics are given, followed by the description of the Debye dispersive model in  
88 Section II -B. The asymptotic model of electroporation and the pulse characteristics are  
89 briefly outlined in Sections II -C and II -D, respectively. Finally, the model setting and  
90 calculations of the induced TMP and pore density are explained in Section II -E.

### 91 **A. Dielectric double-shelled cell model**

92 A sphere contained a smaller sphere inside, was developed as the dielectric  
93 double-shelled cell model and was adopted in our study, as shown in Fig 1. The large and  
94 small spheres were all shielded by thin layers (represents the plasma membrane or nuclear  
95 membrane). Each component of this model was assumed to be isotropy. To analyse the  
96 evolution of pore density and transmembrane potential on the surface of the cell  
97 membrane, seven sampling points ( $A_1$ - $A_7$ ) were selected, and the angle between every  
98 next two points was  $15^\circ$ . The parameters of this model are detailed in Table 1.

# Nonlinear Dispersive Cell Model for Microdosimetry of Nanosecond Pulsed Electric Fields

99

100 **Fig 1. Dielectric double-shelled cell model.**

101

102

**Table 1. Cell parameters used in our study**

| Parameter type                                     | Description/Symbol                                 | Value                                                     |
|----------------------------------------------------|----------------------------------------------------|-----------------------------------------------------------|
| <b>Geometrical parameters</b><br>( $\mu\text{m}$ ) | Cell radius                                        | 5 <sup>[23]</sup>                                         |
|                                                    | Plasma membrane thickness                          | 0.01 <sup>[23]</sup>                                      |
|                                                    | Nuclear radius                                     | 2.5 <sup>[19]</sup>                                       |
|                                                    | Nuclear membrane thickness                         | 0.01 <sup>[19]</sup>                                      |
| <b>Conductivity</b><br>(S/m)                       | Extracellular                                      | 0.55 <sup>[22]</sup>                                      |
|                                                    | Plasma membrane                                    | $1.1 \times 10^{-7}$ <sup>[22]</sup>                      |
|                                                    | Cytoplasm                                          | 0.55 <sup>[22]</sup>                                      |
|                                                    | Nuclear membrane                                   | $1.1 \times 10^{-5}$ <sup>[21]</sup>                      |
|                                                    | Nuclear cytoplasm                                  | 0.55 <sup>[19]</sup>                                      |
| <b>Relative permittivity</b>                       | Extracellular                                      | 67.00 <sup>[22]</sup>                                     |
|                                                    | Plasma membrane                                    | 5 <sup>[21]</sup>                                         |
|                                                    | Cytoplasm                                          | 67.00 <sup>[22]</sup>                                     |
|                                                    | Nuclear membrane                                   | 5 <sup>[19]</sup>                                         |
|                                                    | Nuclear cytoplasm                                  | 67.00 <sup>[19]</sup>                                     |
| <b>Relaxation parameters</b>                       | First relaxation time ( $\tau_1$ )                 | $3.0 \times 10^{-9}$ [s] <sup>[21]</sup>                  |
|                                                    | Second relaxation time ( $\tau_2$ )                | $4.6 \times 10^{-10}$ [s] <sup>[21]</sup>                 |
|                                                    | First relaxation amplitude ( $\Delta\epsilon_1$ )  | $2.3 \times 10^{-11}$ [F/m] <sup>[21]</sup>               |
|                                                    | Second relaxation amplitude ( $\Delta\epsilon_2$ ) | $7.4 \times 10^{-12}$ [F/m] <sup>[21]</sup>               |
|                                                    | High frequency permittivity ( $\epsilon_\infty$ )  | $13.9 \times 10^{-12}$ [F/m] <sup>[21]</sup>              |
| <b>Electroporation parameters</b>                  | Electroporation parameters ( $\alpha$ )            | $1.0 \times 10^9$ [1/(m <sup>2</sup> ×s)] <sup>[27]</sup> |
|                                                    | Equilibrium pore density ( $N_0$ )                 | $1.5 \times 10^9$ [1/m <sup>2</sup> ] <sup>[27]</sup>     |
|                                                    | Characteristic voltage ( $V_{ep}$ )                | 0.258[V] <sup>[27]</sup>                                  |
|                                                    | Electroporation constant ( $q$ )                   | 2.46 <sup>[27]</sup>                                      |

## Nonlinear Dispersive Cell Model for Microdosimetry of Nanosecond Pulsed Electric Fields

---

|                                             |                              |
|---------------------------------------------|------------------------------|
| Pore radius ( $r_p$ )                       | 0.76[nm] <sup>[27]</sup>     |
| Energy barrier within pore ( $w_0$ )        | 2.65 <sup>[27]</sup>         |
| Conductivity of aqueous pore ( $\sigma_p$ ) | 1.3[S/m] <sup>[27]</sup>     |
| Relative entrance length of pores ( $n$ )   | 0.15 <sup>[27]</sup>         |
| Temperature (T)                             | 295[K] <sup>[27]</sup>       |
| Universal gas constant (R)                  | 8.314[J/K/mol]               |
| Faraday's constant (F)                      | 9.65×10 <sup>4</sup> [C/mol] |

---

103

### 104 **B. Debye dispersion**

105 The static cell model was often treated as frequency-independent, and the cellular  
106 components should be regarded as lossy dielectrics when the applied electric field with  
107 frequency higher than megahertz. Commonly, effective conductivity and effective  
108 dielectric permittivity were used to describe their changes with frequency. Second-order  
109 Debye equation, which described the complex permittivity, was used in calculation of  
110 TMP in the time domain. The equation is expressed as:

$$111 \quad \varepsilon(f) = \varepsilon_\infty + \frac{\Delta\varepsilon_1}{1 + j\omega\tau_1} + \frac{\Delta\varepsilon_2}{1 + j\omega\tau_2} \quad (1)$$

112 For a linear and isotropic medium the polarization vector is expressed as:

$$113 \quad P = (\varepsilon - \varepsilon_0)E \quad (2)$$

114 Where  $\varepsilon$  and  $\varepsilon_0$  are the permittivity of the medium and vacuum, respectively.  
115 Dispersion is accomplished in the time-domain by defining the polarization of the  
116 medium as a function of the electric field and its time derivatives. For a second order  
117 dispersive medium substitution of (1) into (2) and taking  $j\omega$  as the derivative with respect

## Nonlinear Dispersive Cell Model for Microdosimetry of Nanosecond Pulsed Electric Fields

118 to time yields.

$$\begin{aligned}
 & P + (\tau_1 + \tau_2) \frac{\partial P}{\partial t} + \tau_1 \tau_2 \frac{\partial^2 P}{\partial t^2} = (\varepsilon_{m0} - \varepsilon_0) E \\
 & + [(\varepsilon_{m0} - \Delta\varepsilon_1 - \varepsilon_0) \tau_1 + (\varepsilon_{m0} - \Delta\varepsilon_2 - \varepsilon_0) \tau_2] \frac{\partial E}{\partial t} \quad (3) \\
 & + (\varepsilon_{m0} - \Delta\varepsilon_1 - \Delta\varepsilon_2 - \varepsilon_0) \tau_1 \tau_2 \frac{\partial^2 E}{\partial t^2}
 \end{aligned}$$

120 Where  $\varepsilon_{m0}$  is the low frequency permittivity of the membrane.

$$\varepsilon_{m0} = \varepsilon_\infty + \Delta\varepsilon_1 + \Delta\varepsilon_2 \quad (4)$$

### 122 C. Electroporation Equation

123 The electroporation model used here is the asymptotic version of the Smoluchoski  
 124 equation, and this model are plausible for signal durations in the nanosecond time scale as  
 125 noted in [29-30]. Equation 5 describes the rate of creation and destruction of hydrophilic  
 126 membrane pores per local membrane area  $N(t)$  as a function of the TMP( $t$ ).

$$\frac{dN(t)}{dt} = \alpha e^{(1-q)\left(\frac{\text{TMP}(t)}{V_{\text{ep}}}\right)^2} \left( e^{q\left(\frac{\text{TMP}(t)}{V_{\text{ep}}}\right)^2} - \frac{N(t)}{N_0} \right) \quad (5)$$

128 Where TMP( $t$ ) is the transmembrane potential of plasma membrane, the definitions  
 129 and typical values of the constants in (1) - (5) are given in Table 1.

### 130 D. Features of the nsPEFs

131 Trapezoidal-shaped pulses were adopted, as suggested in [21]. The pulse durations  
 132 were 10 ns and 3 ns with amplitude of 10 and 18.3 kV/cm, respectively. In addition,  
 133 bipolar pulse of pulse duration of 5 ns and interval of 6 ns, and unipolar pulse of pulse  
 134 duration of 5 ns and interval of 6 ns were adopted, with amplitude of 10 kV/cm. All pulses



## Nonlinear Dispersive Cell Model for Microdosimetry of Nanosecond Pulsed Electric Fields

135 have the same power density to obtain comparable results. The rise and fall times were  
136 chosen to equal to 1 ns for all pulses (Fig 2).

137

138 **Fig 2. Modeled electrical pulse shapes, magnitudes, and pulse width.** Single nsPEFs of  
139 duration of 3 ns and amplitude of 183 V (a), bipolar nsPEFs of pulse duration of 5 ns with  
140 time interval of 6ns and amplitude of 100V (b), unipolar nsPEFs of pulse duration of 5 ns  
141 with time interval of 6ns and amplitude of 100 V (c), single nsPEFs of duration of 10ns  
142 and amplitude of 100V (d). For 3 ns pulse, the ratio of voltage to distance is 18.3 kV/cm,  
143 and for the latter three pulses, which is 10 kV/cm, to ensure the same power density within  
144 all cases for comparison.

145

### 146 **E. Model settings and calculation of the induced TMP**

147 The calculations were performed in Comsol Multiphysics 5.3a using the Electric  
148 currents, and the PDE modes-coefficient form, transient analysis mode. The opposite  
149 vertical faces of the block were modelled as electrodes, which was done by assigning  
150 electric potential to each face. The right electrode was set to electric pulse of duration of  
151 10 and 3 ns (or 5 ns bipolar and unipolar pulses) and the left to the ground to obtain the  
152 desired electric field. The remaining faces of the block were modelled as insulating. The  
153 mesh size was refined until there was less than a 2% difference in the field results between  
154 refinements, resulting in fine mesh setting. The electric potential  $\phi$  inside and outside the

## Nonlinear Dispersive Cell Model for Microdosimetry of Nanosecond Pulsed Electric Fields

155 cell was then computed by solving the equation.

$$156 \quad \frac{-\nabla \cdot \partial(\varepsilon_0 \nabla \varphi + P)}{\partial t} - \nabla \cdot \sigma_m(t) \nabla \varphi = 0 \quad (6)$$

157 We use Electric Currents to solve the Laplace equation, the PDE modes-coefficient  
158 form to solve the pore density equation and the polarization vector equation. The Laplace  
159 equation is solved at the subdomains of extracellular medium, plasma membrane,  
160 cytoplasm, nuclear membrane and nuclear cytoplasm, the pore density equation is solved  
161 on the subdomain of plasma membrane, and the polarization vector equation is solved  
162 inside the subdomains of plasma membrane and nuclear membrane, the initial value of all  
163 the variables are set to zero at  $t=0$  except for the resting potential is set to  $-70$  mV and the  
164 initial density of the pores on the plasma membrane which is set to  $N_0$ , the equilibrium  
165 pore density. Finally, the induced transmembrane potential was calculated as the  
166 difference between electric potentials on both sides of the membrane:

$$167 \quad \Delta \phi = \phi_o(t) - \phi_i(t) \quad (7)$$

168 and was plotted as a function of the arc length and time.

169

## 170 **Results**

171 Results are subdivided into three sections. At first, simulation verification by  
172 comparing the simulation results with analytical results is described, and then the  
173 distribution of TMP with Debye dispersive model is investigated. Finally, time evolution

## Nonlinear Dispersive Cell Model for Microdosimetry of Nanosecond Pulsed Electric Fields

174 and spatial distribution of TMP and pore density with the consideration of both DP and EP  
175 is studied.

### 176 **A. Simulation verification**

177 To test the accuracy of the Comsol Multiphysics code, based on a dielectric  
178 double-shelled cell model without either DP or EP, we examined the TMP of point  $A_1$   
179 (where TMP is maximum) with the electric field of pulse duration of 100  $\mu\text{s}$  and field  
180 intensity of 1 kV/cm by comparing the analytical and simulation results. The analytical  
181 result was done by solving the first-order Schwan equation with parameters in Table 1.  
182 Fig 3 shows the time evolution of TMP of point  $A_1$ , and the simulation result agrees very  
183 well with the analytical result, yet, the analytical result is a bit larger between 5  $\mu\text{s}$  and 105  
184  $\mu\text{s}$ , which could be due to zero permittivity considered in first-order Schwan equation  
185 while our simulation did include a finite permittivity. But in general, the temporal trend of  
186 the simulation and analytical results is similar, so we think the simulation has a  
187 satisfactory accuracy. The reason why we used the cell model without either DP or EP is  
188 that the analytical result of TMP in such cell model is so complicated. Furthermore,  
189 pulsed electric field of duration of 100  $\mu\text{s}$  instead of 100 ns was used because the  
190 time-domain result of TMP with the duration time of pulsed electric field less than the  
191 charging time of plasma membrane ( $\sim 1 \mu\text{s}$ ) is complicated.

192

## Nonlinear Dispersive Cell Model for Microdosimetry of Nanosecond Pulsed Electric Fields

193 **Fig 3. Time evolution of TMP of point A<sub>1</sub>.** Time evolution of TMP of A<sub>1</sub> with  $\mu$ sPEF of  
194 100  $\mu$ s and 1 kV/cm (a) and the error between analytical and simulation results, in which  
195 the analytical result obtained by solving the first-order Schwan equation (b).

196

### 197 **B. TMP distribution with and without dielectric relaxation**

198 First, we investigated the TMP distribution of plasma membrane and nuclear  
199 membrane in the frequency domain when the amplitude of the electric field is 10 kV/cm  
200 in two different modes, with and without DP, and the results are shown in Fig 4a. TMP of  
201 the plasma membrane shows first order low-pass filter characteristic, while nuclear  
202 membrane shows first-order band-pass filter characteristic approximately, which agrees  
203 well with previous studies [31].

204 TMP distribution calculated with DP was compared with those without DP, and it  
205 indicated that TMP was underestimated from  $10^{6.5}$  to  $10^{10}$  Hz when DP was not taken into  
206 account. The relative permittivity of plasma membrane changes with frequency when DP  
207 is taken into account in Fig 4b, and the trend is similar to TMP of the plasma membrane.

208 With the definition of polarization vector P, two-order Debye equation which  
209 describes dielectric relaxation of plasma membrane and nuclear membrane in the  
210 frequency domain was transformed into the time domain by Laplace transform, then TMP  
211 distribution of cell model which includes dielectric relaxation with the application of  
212 nsPEFs can be solved in the time domain. The time course of polarization vector of point

## Nonlinear Dispersive Cell Model for Microdosimetry of Nanosecond Pulsed Electric Fields

213  $A_1$  with the application of nsPEFs (pulse duration of 10ns, field intensity of 10 kV/cm, rise  
214 time of 1 ns) is illustrated in Fig 4c. The time trend of polarization vector is almost the  
215 same as the nsPEFs except a slower change both during the rising and decreasing periods.  
216 The flat top of the polarization vector is about  $3.5 \times 10^{-5}$  C/m<sup>2</sup>, which corresponds to a  
217 relative permittivity of 5 (equals to static relative permittivity of plasma membrane),  
218 which can prove the correctness of our simulation.

219 The time course of TMP of point  $A_1$  with and without DP is shown in Fig 4d, TMP of  
220 plasma membrane is always larger with DP than those without during limited observation  
221 time, and the biggest difference is about 3 V, furthermore, significant decrease in both the  
222 rising and falling periods can be found with DP. The simulation results are in well  
223 agreement with previous studies [22-24], which indicate that TMP is underestimated  
224 when the DP was not taken into account, in other words, temporal and spatial distribution  
225 of TMP can be obtained more accurately with the consideration of dielectric relaxation of  
226 all cell compartments.

227

228 **Fig 4. TMP distribution with and without dielectric relaxation.** The induced TMP on  
229 the cellular membrane (NP for non-dispersive plasma membrane, DP for dispersive  
230 plasma membrane) and nuclear membrane (NN for non-dispersive nuclear membrane,  
231 DN for dispersive nuclear membrane) versus frequency when the amplitude of the electric  
232 field is 10 kV/cm (a), relative permittivity of plasma membrane versus frequency (b), time

## Nonlinear Dispersive Cell Model for Microdosimetry of Nanosecond Pulsed Electric Fields

233 courses of nsPEFs (gray) and polarization of point  $A_1$  (black) (c), time courses of TMP of  
234 points  $A_1$  in dispersive (dotted line) and non-dispersive (solid line) mode (d).

235

### 236 **C. Temporal and spatial results with both EP and DP**

237 In order to investigate the effects of both DP and EP on the temporal and spatial  
238 distribution of TMP of plasma membrane, four nsPEFs with various pulse duration, field  
239 intensity and polarity were selected, which are of the same power density to obtain  
240 comparable results. Time evolution of TMP and pore density of  $A_1$  with the application of  
241 the above four different nsPEFs in two different modes (EP and DP+EP) is shown in Fig  
242 5, TMP of  $A_1$  exceeded the critical threshold (1V) with the application of 10ns and 5ns  
243 unipolar pulses, however, only the latter pulse induced profound increase in pore density  
244 of  $A_1$ , which reached the electroporation threshold ( $PT=10^{15}$ ), in the EP mode.

245 TMP and pore density of  $A_1$  attained its threshold with all four nsPEFs in the DP+EP  
246 mode, and the time required to attain the threshold is much shorter than that of the EP  
247 mode, in agreement with [22-24].

248 After the electroporation threshold  $PT$  was overcome the conductivity started to  
249 increase, and significant increase in conductivity of  $A_1$  was observed with only the 5 ns  
250 unipolar pulse in EP mode, while significant increase in conductivity of  $A_1$  was observed  
251 with all four nsPEFs in the DP+EP mode.

252

## Nonlinear Dispersive Cell Model for Microdosimetry of Nanosecond Pulsed Electric Fields

253 **Fig 5 Time evolution of TMP and pore density of  $A_1$  with four different nsPEFs.**  
254 **Temporal distribution of TMP of  $A_1$  in EP mode (a) and EP+DP mode (b), pore density of**  
255  **$A_1$  in EP mode (c) and EP+DP mode (d), conductivity of  $A_1$  in EP mode (e) and EP+DP**  
256 **mode (f), with four nsPEFs.**

257

258 To get in-depth understanding of the effects of both EP and DP on the temporal and  
259 spatial distribution of TMP, we selected seven points separated by  $15^\circ$  in the upper left  
260 quarter of the plasma membrane to study the time course of TMP and pore density with  
261 the 10 ns pulse, and spatial distribution of TMP and pore density was achieved along the  
262 half arc length of plasma membrane from  $A_1$  to  $A_8$ , both in two different modes (EP and  
263 DP+EP). In the EP mode (Figs 6a, c, e and g), the TMP of  $A_1$  began to increase at 0ns once  
264 the pulse was delivered to the cell, reaching a TMP threshold of about 1V at 8.4 ns, then to  
265 its peak value of about 1.2 V at 10.2 ns, in agreement with [22]. The time trend is similar  
266 in  $A_2$ - $A_7$  except a smaller TMP value, and peak values of TMP of  $A_1$ - $A_3$  exceed 1V, while  
267  $A_4$ - $A_7$  is smaller than 1 V. Once the threshold of 1V was overcome the pore density started  
268 to increase, in accordance with [22], however, pore density of  $A_1$  did not reach up to the  
269 threshold (PT) of  $10^{15} \text{ m}^{-2}$  in our simulation, which may due to the differences in model  
270 parameters used in our simulation to that of [22]. Spatial distribution of TMP and pore  
271 density along the half arc length of plasma membrane gave the similar results, and typical  
272 values were listed in Table 1. In addition, significant increase in conductivity of  $A_1$ - $A_7$   
273 and along the arc length of plasma membrane was not observed in the EP mode (Figs 6i

## Nonlinear Dispersive Cell Model for Microdosimetry of Nanosecond Pulsed Electric Fields

274 and k), and the results are in good agreement with the pore density distribution,  
275 demonstrating that cell is not effectively electroporated in the EP mode.

276

277 **Fig 6. Temporal and spatial results from point A<sub>1</sub> to A<sub>8</sub>.** Temporal distribution of TMP  
278 of A<sub>1</sub>-A<sub>7</sub> in EP mode (a) and EP+DP mode (b), pore density of A<sub>1</sub>-A<sub>7</sub> in EP mode (e) and  
279 EP+DP mode (f), and conductivity of A<sub>1</sub>-A<sub>7</sub> in EP mode (i) and EP+DP mode (j), spatial  
280 distribution of TMP along the arc length of plasma membrane from A<sub>1</sub> to A<sub>8</sub> at different  
281 times in EP mode (c) and EP+DP mode (d), pore density in EP mode (g) and EP+DP mode  
282 (h), and conductivity in EP mode (k) and EP+DP mode (l), when nsPEFs of 10 ns and  
283 10kV/cm is applied.

284

285 With the consideration of both EP and DP in the cell model, the TMP of A<sub>1</sub> started to  
286 increase at 0 ns once the pulse was delivered to the cell, reaching rapidly a TMP threshold  
287 of about 1 V at 1.4 ns, then to its peak value of about 1.58 V at 2.7 ns, much faster and  
288 larger value of TMP was achieved with the consideration of DP (Figs 6b and d). Once the  
289 threshold of 1V was overcome, the pore density began to increase reaching the membrane  
290 poration at the threshold of  $10^{15} \text{ m}^{-2}$ , after the PT was overcome the conductivity started to  
291 increase reaching about 5 orders of the initial value (Figs 6f, h, j and l), in accordance with  
292 [22]. Similar results can be found in A<sub>2</sub>-A<sub>4</sub> with a decreasing peak value of TMP, flat top  
293 value of pore density and conductivity, however, TMP of A<sub>5</sub> exceeded the threshold of 1



## Nonlinear Dispersive Cell Model for Microdosimetry of Nanosecond Pulsed Electric Fields

294 V, while pore density does not overcome the PT and conductivity increased a little bit.  
295 Spatial distribution of the TMP, pore density and conductivity along the arc length of  
296 plasma membrane gave the similar results, demonstrating that at least  $45^\circ$  near  $A_1$  of the  
297 upper left quarter of the plasma membrane is electroporated, in accordance with [32].  
298 Similar results were also obtained with the application of three other nsPEFs, which is not  
299 shown in this paper.

300

### 301 **Discussion and conclusion**

302 Our paper proposes that a microdosimetric study on nsPEFs includes dielectric  
303 relaxation of cell plasma membrane and nuclear membrane through a two-order Debye  
304 model, and the two-order Debye model is transformed into the time domain with the  
305 introduction of polarization vector. Then we obtain the time course of TMP by solving the  
306 combination of Laplace equation and time-domain Debye equation. Next, we used the  
307 asymptotic version of the smoluchowski equation to characterize electroporation of  
308 plasma membrane and added it to our model to predict the temporal and spatial  
309 distribution of TMP and pore density.

310 Our results highlight the relevance of dielectric relaxation in nsPEFs microdosimetry,  
311 as evidenced by the fact that both the TMP, pore density and the conductivity are strongly  
312 influenced by the dispersion. TMP, pore density and conductivity is underestimated if  
313 Debye model is disregarded. Therefore, for pulse duration less than or equal to 10ns, the

## Nonlinear Dispersive Cell Model for Microdosimetry of Nanosecond Pulsed Electric Fields

314 inclusion of the Debye equation in the characterization of the cell compartments is  
315 necessary to accurately quantify TMP, pore density and conductivity.

316 During the evaluation of this simulation, we noted that it was unable to find all of the  
317 parameters for a single cell in literature. The parameters listed in Table.1, such as cell  
318 geometrical size, conductivity and permittivity of all components, were obtained from  
319 external sources, other theoretical models, or experiments. Thus, differences between  
320 experimental results and simulation results are predictable. In order to prove the  
321 correctness of our simulation, we evaluated the time course of TMP of  $A_1$ , and compared  
322 the simulation results with that of the analytical results obtained with the first-order  
323 Schwan equation, both used the same model parameters listed in Table.1, and our  
324 algorithm gives satisfactory accuracy with a maximum difference of about 2%. TMP  
325 distribution both in the frequency and time domain is underestimated without considering  
326 dielectric relaxation during specific frequency or with pulse duration less than or equal to  
327 10 ns, and this trend is in well agreement with previous studies, furthermore, correctness  
328 of the interpretation of Debye model in frequency and the time domain can be proved by  
329 the spectrum distribution of relative permittivity and time course of the polarization  
330 vector.

331 One unique aspect of this study is to include both DP and EP in the dielectric  
332 double-shelled cell model, to obtain the temporal and spatial distribution of TMP of  
333 plasma membrane without the introduction of complex mathematics. And the algorithm

## Nonlinear Dispersive Cell Model for Microdosimetry of Nanosecond Pulsed Electric Fields

334 presented in this study can be easily applied to biological cell of irregular shapes, even to  
335 real biological cells.

336 In EP mode, TMP of  $A_1$ - $A_7$  follows the  $\cos\theta$  law, as evidenced by the peak value of  
337 TMP listed in Table.1, which means that plasma membrane is not electroporated, as  
338 previous experimental studies demonstrated that the  $\cos\theta$  law is not valid once significant  
339 poration occurs, and the results are in accordance with the pore density and conductivity  
340 distribution, where pore density electroporation threshold PT is not overcome and no  
341 significant increase in conductivity is observed. In EP+DP mode (Table.2), TMP of  
342 different points on plasma membrane does not follow the  $\cos\theta$  law, and pore density  
343 electroporation threshold PT is overcome in  $A_1$ - $A_4$ , where significant increase in  
344 conductivity is also found, demonstrate that at least  $45^\circ$  of  $90^\circ$  of plasma membrane is  
345 electroporated. Krassowska and Filev [32] found that the boundary of the electroporation  
346 and the nonelectroporation is  $45^\circ$ , and this value is similar to our simulation results.

347 In addition, Fig 6f shows that the location on the membrane closest to the electrodes  
348 has the largest pore density, and the pore density decreases from the point to the pole.  
349 Pucihar and colleagues [27] observed that the electrode near the membrane had the  
350 maximum fluorescence intensity, which was consistent with our results. Significant  
351 increase of about 5 orders was observed in the conductivity of  $A_1$ - $A_4$  in Fig 6j, in  
352 agreement with [33], in which conductivity of an oxidized cholesterol membrane with the  
353 application of  $20 \mu\text{s}$  pulse was measured, and significant increase of 4 to 5 orders in  
354 conductivity was found. Although previous studies showed that nsPEFs induced more

## Nonlinear Dispersive Cell Model for Microdosimetry of Nanosecond Pulsed Electric Fields

355 pronounced increase in conductivity through EP than that of  $\mu$ sPEFs [18], our simulation  
 356 can give comparable results.

357

358

**Table 2**

359 **Typical values obtained from Fig 6, which includes peak value of TMP and flat top**  
 360 **value of pore density at different points, in both EP and DP+EP modes, and the time**  
 361 **required to attain the typical values is also taken into account. Commonly, TMP of 1**  
 362 **V and pore density of  $10^{15}$  is used as threshold value to predict the appearance of**  
 363 **electroporation.**

| Points         | Peak value of TMP (EP)/time required to reach the peak value | Peak value of TMP(EP+DP)/time required to reach the peak value | Flat top value of pore density (EP) | Flat top value of pore density (EP+DP) |
|----------------|--------------------------------------------------------------|----------------------------------------------------------------|-------------------------------------|----------------------------------------|
| A <sub>1</sub> | 1.18 V/10.2 ns                                               | 1.58 V/2.7 ns                                                  | 2.3e9/10.7 ns                       | 3.90e15/3.1 ns                         |
| A <sub>2</sub> | 1.14 V/10.2 ns                                               | 1.57 V/2.8 ns                                                  | 1.7e9/10.7 ns                       | 3.11e15/3.4 ns                         |
| A <sub>3</sub> | 1.02 V/10.2 ns                                               | 1.55 V/3.4 ns                                                  | N <sub>0</sub>                      | 2.39e15/4.1 ns                         |
| A <sub>4</sub> | 0.83 V/10.2 ns                                               | 1.53 V/4.8 ns                                                  | N <sub>0</sub>                      | 1.44e15/6.6 ns                         |
| A <sub>5</sub> | 0.59 V/10.2 ns                                               | 1.44 V/9.9 ns                                                  | N <sub>0</sub>                      | 6.67e13/10.5 ns                        |
| A <sub>6</sub> | 0.30 V/10.2 ns                                               | 0.85 V/10 ns                                                   | N <sub>0</sub>                      | N <sub>0</sub>                         |
| A <sub>7</sub> | 0 V                                                          | 0                                                              | N <sub>0</sub>                      | N <sub>0</sub>                         |

364

365 In EP mode, TMP of 3 ns and 5 ns bipolar pulses did not reach TMP threshold of 1 V,  
 366 while TMP of 10 ns and 5 ns unipolar pulses reached 1 V, however, cell was  
 367 electroporated with only the application 5 ns unipolar pulse, as evidenced by the fact that

## Nonlinear Dispersive Cell Model for Microdosimetry of Nanosecond Pulsed Electric Fields

368 significant increase in pore density and conductivity was observed with only the 5 ns  
369 unipolar pulse, which means that only TMP threshold of 1 V is not sufficient to predict the  
370 EP of biological cell, time evolution of pore density and (or) conductivity need to be taken  
371 into account.

372 To conclude, our results demonstrate that performing nsPEFs dosimetry at the single  
373 cell level is useful to accurately predict the temporal and spatial distribution of TMP, pore  
374 density and conductivity. This type of predictive analysis is effective for optimizing in the  
375 use of pulse generators and applicators in terms of the pulse amplitude and waveform for  
376 medical application needed of the nsPEFs.

377 In this study, only dielectric relaxation of plasma membrane and nuclear membrane  
378 were included, however, dielectric relaxation of the extracellular medium and cytoplasm  
379 has to be included when spectrum of PEF exceeds 20 GHz [21]. The pore radius which  
380 was considered constant in our study varies with time and space and need to be considered  
381 in more detailed model [32]. Furthermore, biological cells with irregular shape or real  
382 cells should be modelled instead of a spherical cell.

383

## 384 **Acknowledgment**

385 This work was supported in part by the National Natural Science Foundation of  
386 China (51507024), in part by the innovation Team Program of Chongqing Education  
387 Committee (CXTDX201601019).

388

# Nonlinear Dispersive Cell Model for Microdosimetry of Nanosecond Pulsed Electric Fields

389

## 390 **References**

- 391 1. Neumann ES, A. E. Sowers, C. A. Jordan, Eds. (1989), Electroporation and  
392 Electrofusion in Cell Biology. New York, NY, USA: Plenum.
- 393 2. Ho, S. Y., & Mittal, G. S. (1996). Electroporation of cell membranes: a review.  
394 Critical reviews in biotechnology, 16(4), 349-362.  
395 <https://doi.org/10.3109/07388559609147426>
- 396 3. OKINO, M., & MOHRI, H. (1987). Effects of a high-voltage electrical impulse and an  
397 anticancer drug on in vivo growing tumors. Japanese Journal of Cancer Research  
398 GANN, 78(12), 1319-1321. [https://doi.org/10.20772/cancersci1985.78.12\\_1319](https://doi.org/10.20772/cancersci1985.78.12_1319)  
399 PMID:2448275
- 400 4. Tekle, E., Astumian, R. D., & Chock, P. B. (1991). Electroporation by using bipolar  
401 oscillating electric field: an improved method for DNA transfection of NIH 3T3 cells.  
402 Proceedings of the National Academy of Sciences, 88(10), 4230-4234.  
403 <https://doi.org/10.1073/pnas.88.10.4230> PMID: 2034667
- 404 5. Mir, L. M., Orłowski, S., Belehradek Jr, J., Teissie, J., Rols, M. P., Serša, G., ... &  
405 Heller, R. (1995). Biomedical applications of electric pulses with special emphasis on  
406 antitumor electrochemotherapy. Bioelectrochemistry and Bioenergetics, 38(1),  
407 203-207. [https://doi.org/10.1016/0302-4598\(95\)01823-W](https://doi.org/10.1016/0302-4598(95)01823-W)

## Nonlinear Dispersive Cell Model for Microdosimetry of Nanosecond Pulsed Electric Fields

- 408 6. Heller, R., Coppola, D., Pottinger, C., Gilbert, R., & Jaroszeski, M. J. (2002). Effect of  
409 electrochemotherapy on muscle and skin. *Technology in cancer research & treatment*,  
410 1(5), 385-391. <https://doi.org/10.1177/153303460200100509> PMID: 12625764
- 411 7. Schoenbach, K. H., Peterkin, F. E., Alden, R. W., & Beebe, S. J. (1997). The effect of  
412 pulsed electric fields on biological cells: Experiments and applications. *IEEE*  
413 *transactions on plasma science*, 25(2), 284-292. DOI: 10.1109/27.602501
- 414 8. Nuccitelli, R., Pliquett, U., Chen, X., Ford, W., Swanson, R. J., Beebe, S. J., ... &  
415 Schoenbach, K. H. (2006). Nanosecond pulsed electric fields cause melanomas to  
416 self-destruct. *Biochemical and biophysical research communications*, 343(2),  
417 351-360. <https://doi.org/10.1016/j.bbrc.2006.02.181> PMID: 16545779
- 418 9. Nuccitelli, R., Chen, X., Pakhomov, A. G., Baldwin, W. H., Sheikh, S., Pomicter, J.  
419 L., ... & Beebe, S. J. (2009). A new pulsed electric field therapy for melanoma disrupts  
420 the tumor's blood supply and causes complete remission without recurrence.  
421 *International journal of cancer*, 125(2), 438-445. doi: 10.1002/ijc.24345. PMID:  
422 19408306
- 423 10. Beebe, S., Sain, N., & Ren, W. (2013). Induction of cell death mechanisms and  
424 apoptosis by nanosecond pulsed electric fields (nsPEFs). *Cells*, 2(1), 136-162.  
425 <https://doi.org/10.3390/cells2010136> PMID: 24709649
- 426 11. Esser, A. T., Smith, K. C., Gowrishankar, T. R., & Weaver, J. C. (2009). Towards  
427 solid tumor treatment by nanosecond pulsed electric fields. *Technology in cancer*

## Nonlinear Dispersive Cell Model for Microdosimetry of Nanosecond Pulsed Electric Fields

- 428 research & treatment, 8(4), 289-306. <https://doi.org/10.1177/153303460900800406>
- 429 PMID: 19645522
- 430 12. Gowrishankar, T. R., Esser, A. T., Vasilkoski, Z., Smith, K. C., & Weaver, J. C.
- 431 (2006). Microdosimetry for conventional and supra-electroporation in cells with
- 432 organelles. *Biochemical and biophysical research communications*, 341(4),
- 433 1266-1276. <https://doi.org/10.1016/j.bbrc.2006.01.094> PMID: 16469297
- 434 13. Schoenbach, K. H., Beebe, S. J., & Buescher, E. S. (2001). Intracellular effect of
- 435 ultrashort electrical pulses. *Bioelectromagnetics: Journal of the Bioelectromagnetics*
- 436 *Society, The Society for Physical Regulation in Biology and Medicine, The European*
- 437 *Bioelectromagnetics Association*, 22(6), 440-448. PMID: 11536285
- 438 14. Tekle, E., Oubrahim, H., Dzekunov, S. M., Kolb, J. F., Schoenbach, K. H., & Chock,
- 439 P. B. (2005). Selective field effects on intracellular vacuoles and vesicle membranes
- 440 with nanosecond electric pulses. *Biophysical journal*, 89(1), 274-284.
- 441 <https://doi.org/10.1529/biophysj.104.054494> PMID: 15821165
- 442 15. White, J. A., Blackmore, P. F., Schoenbach, K. H., & Beebe, S. J. (2004). Stimulation
- 443 of capacitative calcium entry in HL-60 cells by nanosecond pulsed electric fields.
- 444 *Journal of Biological Chemistry*, 279(22), 22964-22972. doi:
- 445 10.1074/jbc.M311135200 PMID: 15821165
- 446 16. Gowrishankar, T. R., & Weaver, J. C. (2006). Electrical behavior and pore
- 447 accumulation in a multicellular model for conventional and supra-electroporation.



## Nonlinear Dispersive Cell Model for Microdosimetry of Nanosecond Pulsed Electric Fields

- 448 Biochemical and biophysical research communications, 349(2), 643-653.  
449 <https://doi.org/10.1016/j.bbrc.2006.08.097> PMID: 16959217
- 450 17. Lamberti, P., Romeo, S., Sannino, A., Zeni, L., & Zeni, O. (2015). The role of pulse  
451 repetition rate in nsPEF-induced electroporation: a biological and numerical  
452 investigation. *IEEE Transactions on Biomedical Engineering*, 62(9), 2234-2243. DOI:  
453 10.1109/TBME.2015.2419813 PMID: 25850084
- 454 18. Zhuang, J., Ren, W., Jing, Y., & Kolb, J. F. (2012). Dielectric evolution of  
455 mammalian cell membranes after exposure to pulsed electric fields. *IEEE*  
456 *Transactions on Dielectrics and Electrical Insulation*, 19(2), 609-622. DOI:  
457 10.1109/TDEI.2012.6180256
- 458 19. Denzi, A., Merla, C., Camilleri, P., Paffi, A., d’Inzeo, G., Apollonio, F., & Liberti, M.  
459 (2013). Microdosimetric study for nanosecond pulsed electric fields on a cell circuit  
460 model with nucleus. *The Journal of membrane biology*, 246(10), 761-767.  
461 <https://doi.org/10.1007/s00232-013-9546-7> PMID: 23595823
- 462 20. Lu, W., Wu, K., Hu, X., Xie, X., Ning, J., Wang, C., ... & Yang, G. (2017). Theoretical  
463 analysis of transmembrane potential of cells exposed to nanosecond pulsed electric  
464 field. *International journal of radiation biology*, 93(2), 231-239.  
465 <https://doi.org/10.1080/09553002.2017.1230244> PMID: 27586355
- 466 21. Kotnik, T., & Miklavčič, D. (2000). Theoretical evaluation of the distributed power  
467 dissipation in biological cells exposed to electric fields. *Bioelectromagnetics: Journal*  
468 *of the Bioelectromagnetics Society, The Society for Physical Regulation in Biology*

## Nonlinear Dispersive Cell Model for Microdosimetry of Nanosecond Pulsed Electric Fields

- 469 and Medicine, The European Bioelectromagnetics Association, 21(5), 385-394.  
470 PMID: 10899774
- 471 22. Merla, C., Paffi, A., Apollonio, F., Leveque, P., d’Inzeo, G., & Liberti, M. (2011).  
472 Microdosimetry for nanosecond pulsed electric field applications: a parametric study  
473 for a single cell. IEEE Transactions on Biomedical Engineering, 58(5), 1294-1302.  
474 DOI: 10.1109/TBME.2010.2104150 PMID: 21216699
- 475 23. Merla, C., Denzi, A., Paffi, A., Casciola, M., d’Inzeo, G., Apollonio, F., & Liberti, M.  
476 (2012). Novel passive element circuits for microdosimetry of nanosecond pulsed  
477 electric fields. IEEE Transactions on Biomedical Engineering, 59(8), 2302-2311.  
478 DOI: 10.1109/TBME.2012.2203133 PMID: 22692873
- 479 24. Joshi, R. P., & Hu, Q. (2011). Case for applying subnanosecond high-intensity,  
480 electrical pulses to biological cells. IEEE Transactions on Biomedical Engineering,  
481 58(10), 2860-2866. DOI: 10.1109/TBME.2011.2161478 PMID: 21937300
- 482 25. Salimi, E., Thomson, D. J., & Bridges, G. E. (2013). Membrane dielectric dispersion  
483 in nanosecond pulsed electroporation of biological cells. IEEE Transactions on  
484 Dielectrics and Electrical Insulation, 20(4), 1256-1265. DOI:  
485 10.1109/TDEI.2013.6571442
- 486 26. Hibino, M., Itoh, H., & Kinoshita Jr, K. (1993). Time courses of cell electroporation as  
487 revealed by submicrosecond imaging of transmembrane potential. Biophysical  
488 journal, 64(6), 1789-1800. [https://doi.org/10.1016/S0006-3495\(93\)81550-9](https://doi.org/10.1016/S0006-3495(93)81550-9) PMID:  
489 8369408

## Nonlinear Dispersive Cell Model for Microdosimetry of Nanosecond Pulsed Electric Fields

- 490 27. Pucihar, G., Miklavcic, D., & Kotnik, T. (2009). A time-dependent numerical model  
491 of transmembrane voltage inducement and electroporation of irregularly shaped cells.  
492 IEEE Transactions on Biomedical Engineering, 56(5), 1491-1501. DOI:  
493 10.1109/TBME.2009.2014244 PMID: 19203876
- 494 28. DeBruin, K. A., & Krassowska, W. (1999). Modeling electroporation in a single cell.  
495 I. Effects of field strength and rest potential. Biophysical journal, 77(3), 1213-1224.  
496 [https://doi.org/10.1016/S0006-3495\(99\)76973-0](https://doi.org/10.1016/S0006-3495(99)76973-0) PMID: 10465736
- 497 29. Neu, J. C., & Krassowska, W. (1999). Asymptotic model of electroporation. Physical  
498 review E, 59(3), 3471. <https://doi.org/10.1103/PhysRevE.59.3471>
- 499 30. Vasilkoski, Z., Esser, A. T., Gowrishankar, T. R., & Weaver, J. C. (2006). Membrane  
500 electroporation: The absolute rate equation and nanosecond time scale pore creation.  
501 Physical review E, 74(2), 021904. <https://doi.org/10.1103/PhysRevE.74.021904>  
502 PMID: 17025469
- 503 31. Yao, C., Mo, D., Li, C., Sun, C., & Mi, Y. (2007). Study of transmembrane potentials  
504 of inner and outer membranes induced by pulsed-electric-field model and simulation.  
505 IEEE Transactions on Plasma Science, 35(5), 1541-1549. DOI:  
506 10.1109/TPS.2007.905110 PMID: 19162838
- 507 32. Krassowska, W., & Filev, P. D. (2007). Modeling electroporation in a single cell.  
508 Biophysical journal, 92(2), 404-417. <https://doi.org/10.1529/biophysj.106.094235>
- 509 33. Sukharev, S. I., Chernomordik, L. V., Abidor, I. G., & Chizmadzhev, Y. A. (1982).  
510 466—Effects of  $UO_2^{2+}$  ions on the properties of bilayer lipid membranes.

# Nonlinear Dispersive Cell Model for Microdosimetry of Nanosecond Pulsed Electric Fields

511 **Bioelectrochemistry and Bioenergetics, 9(2), 133-140.**

512 **[https://doi.org/10.1016/0302-4598\(82\)80169-4](https://doi.org/10.1016/0302-4598(82)80169-4)**

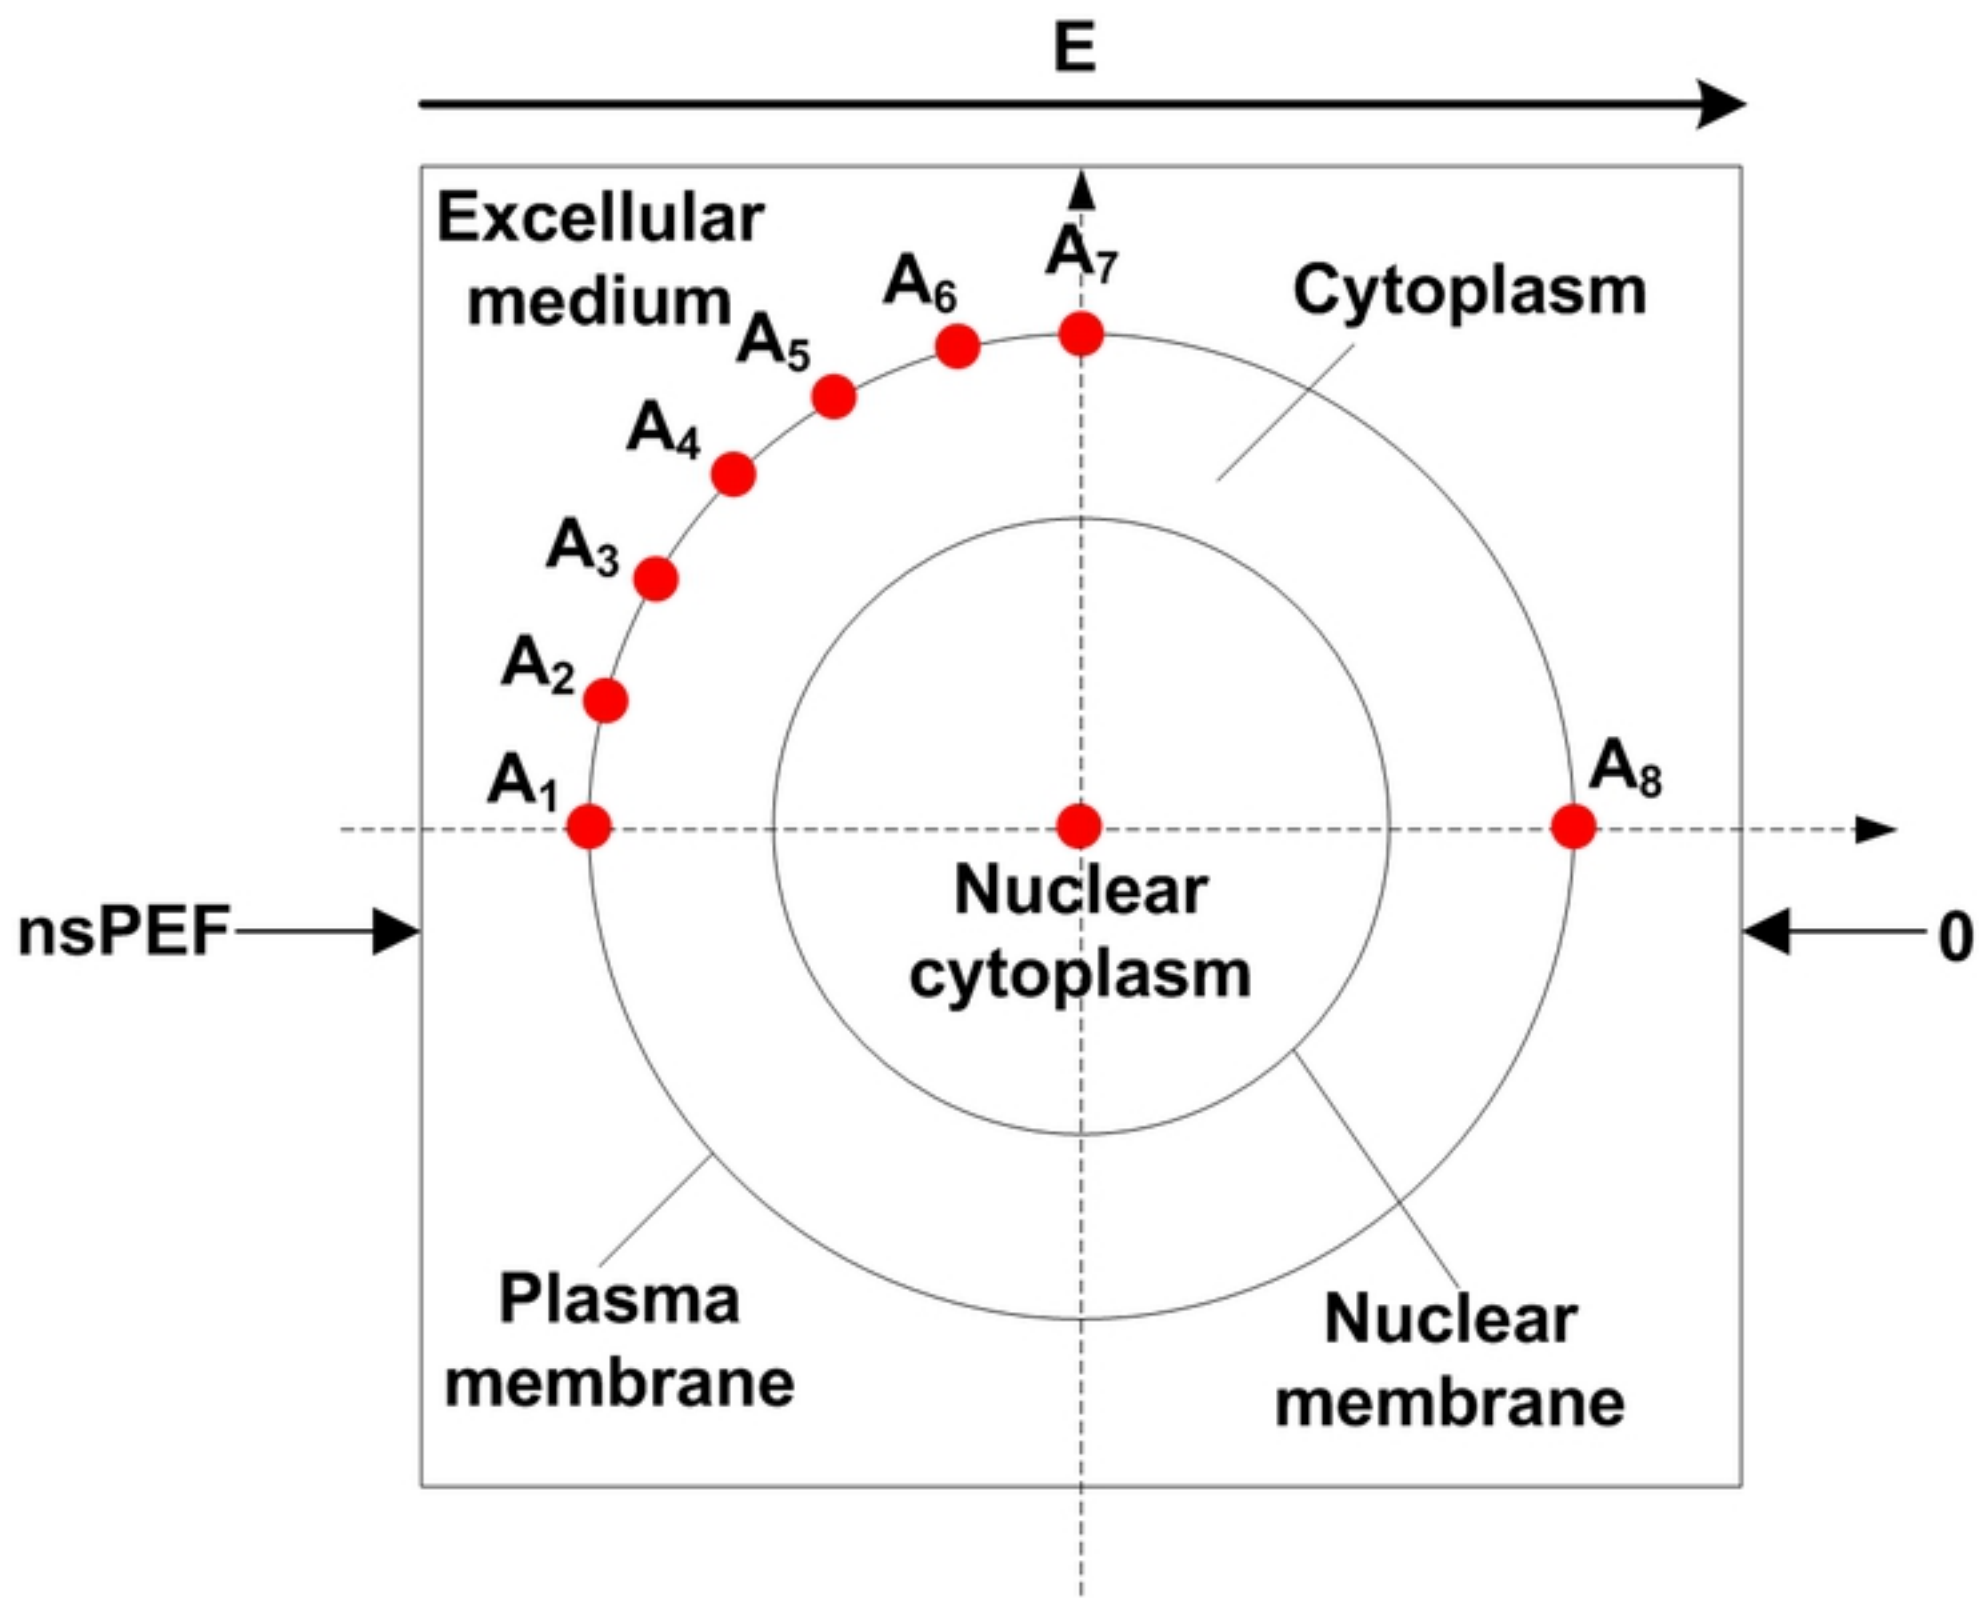

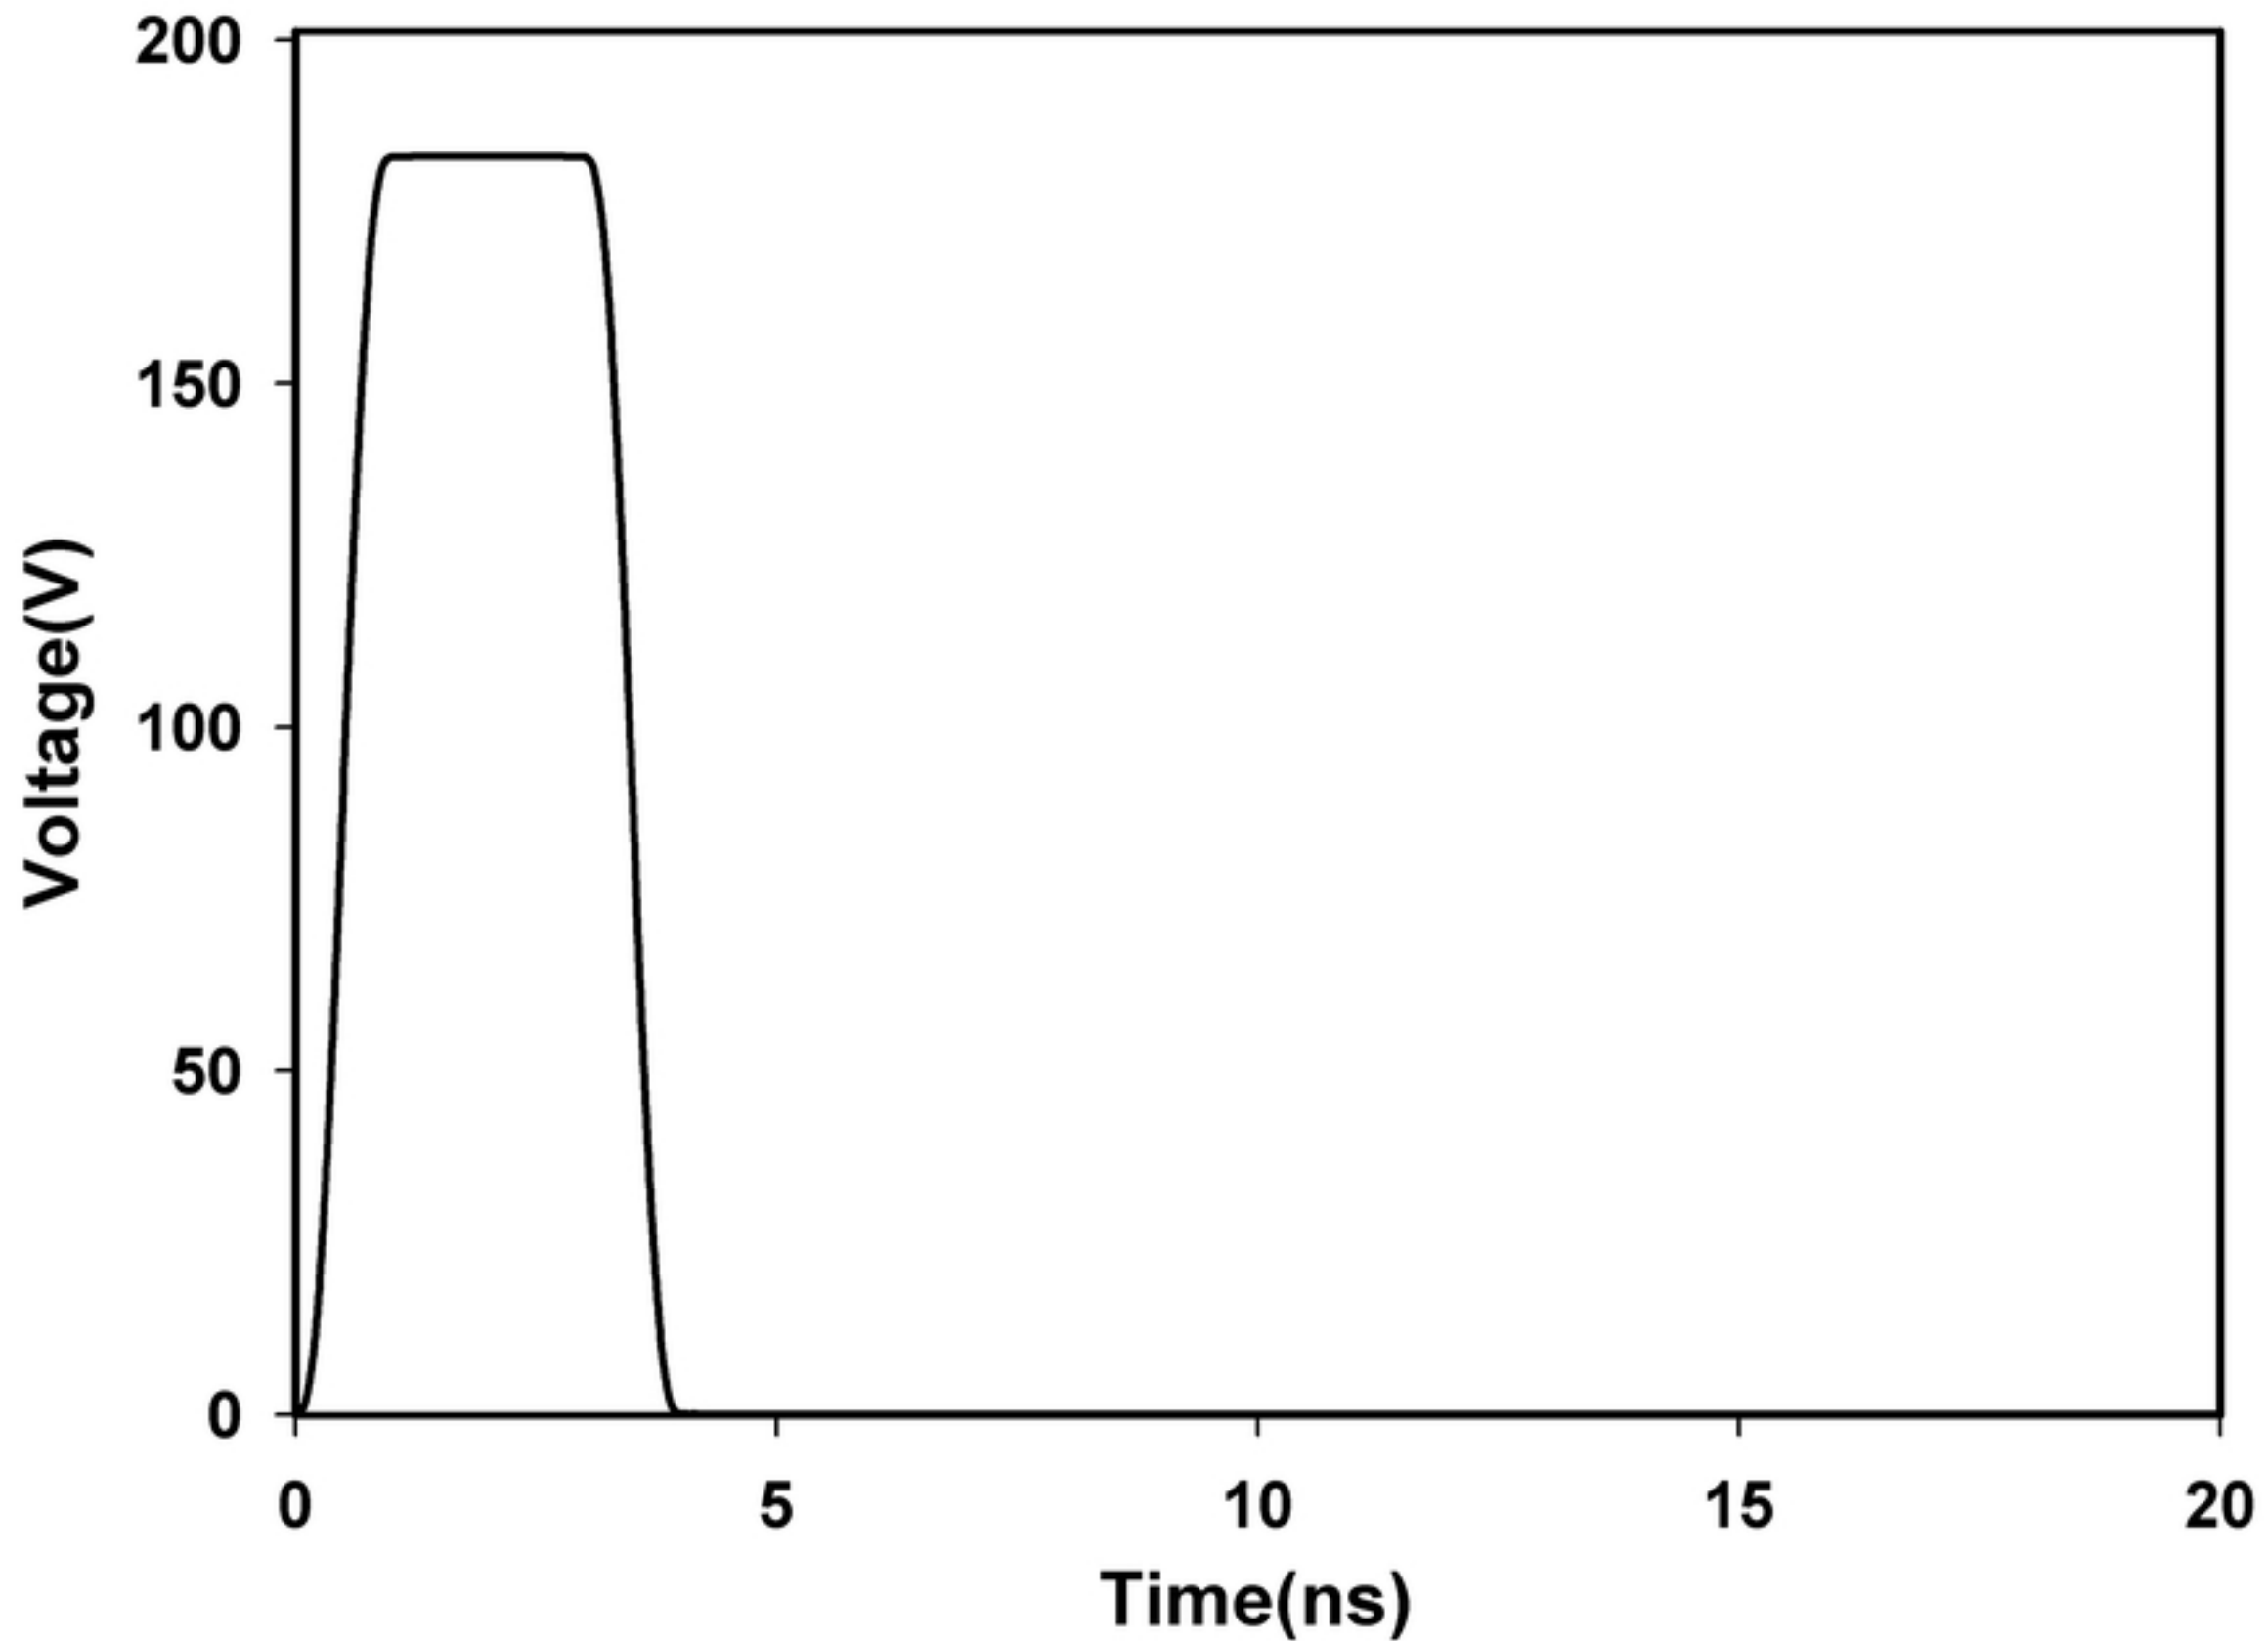

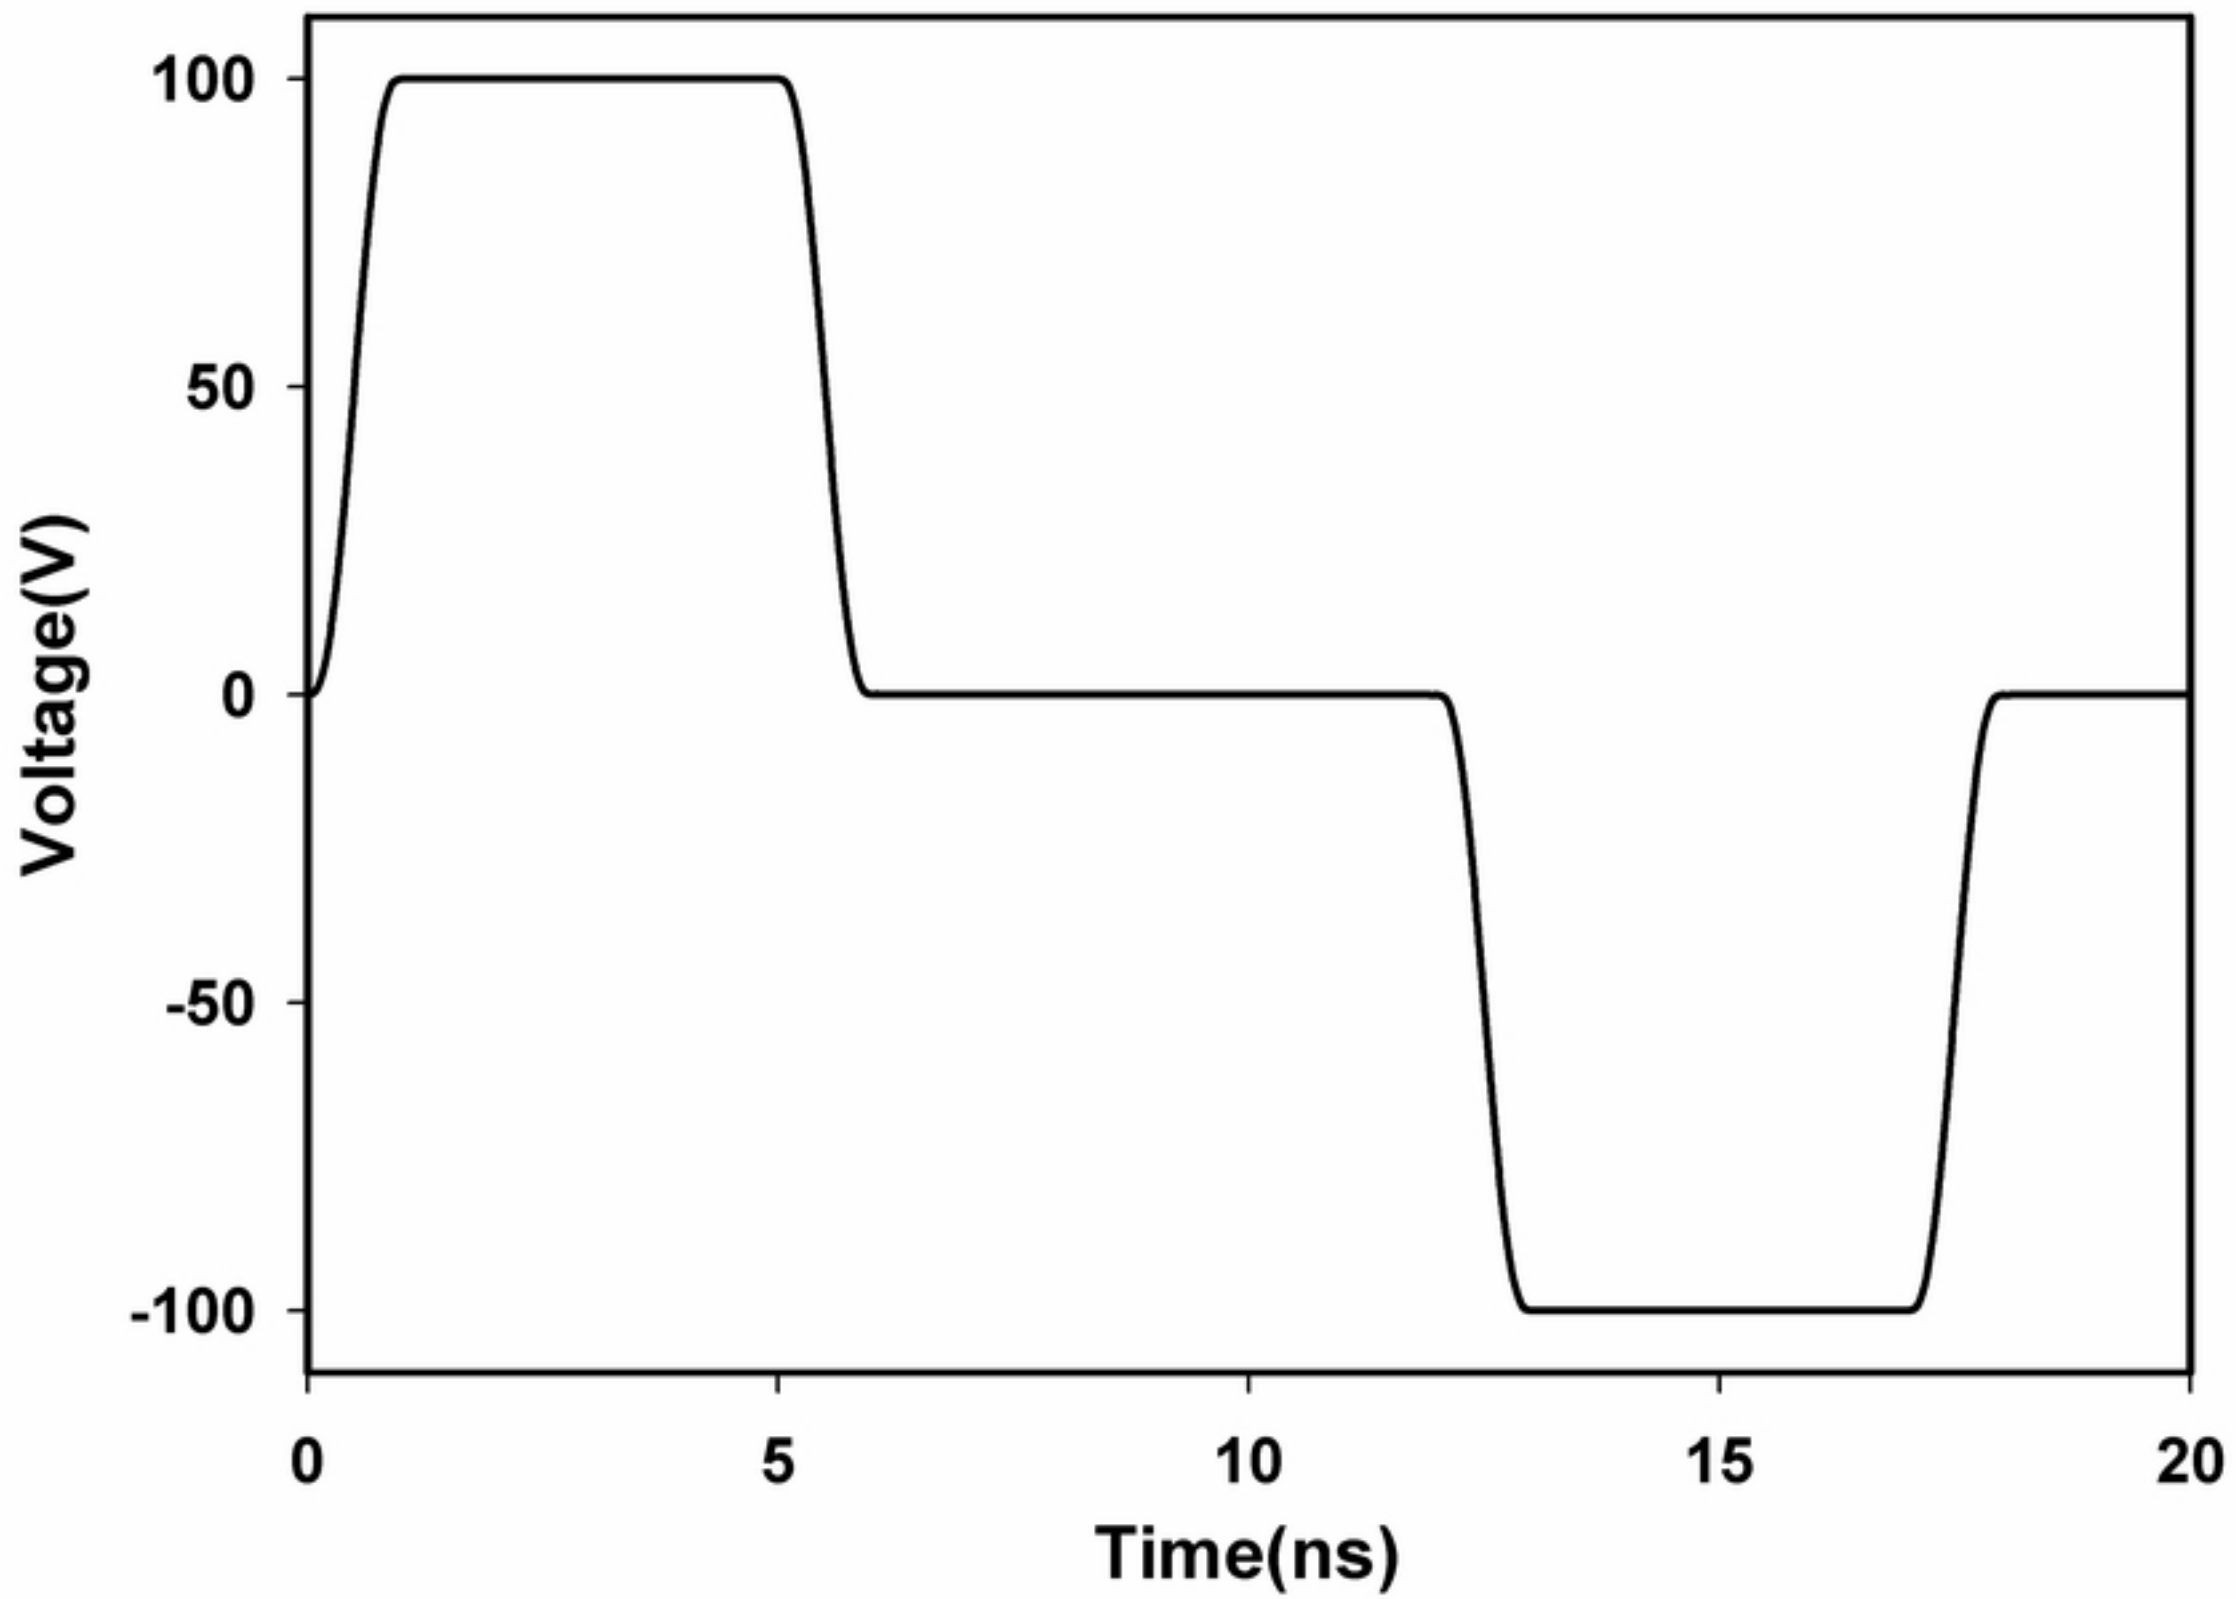

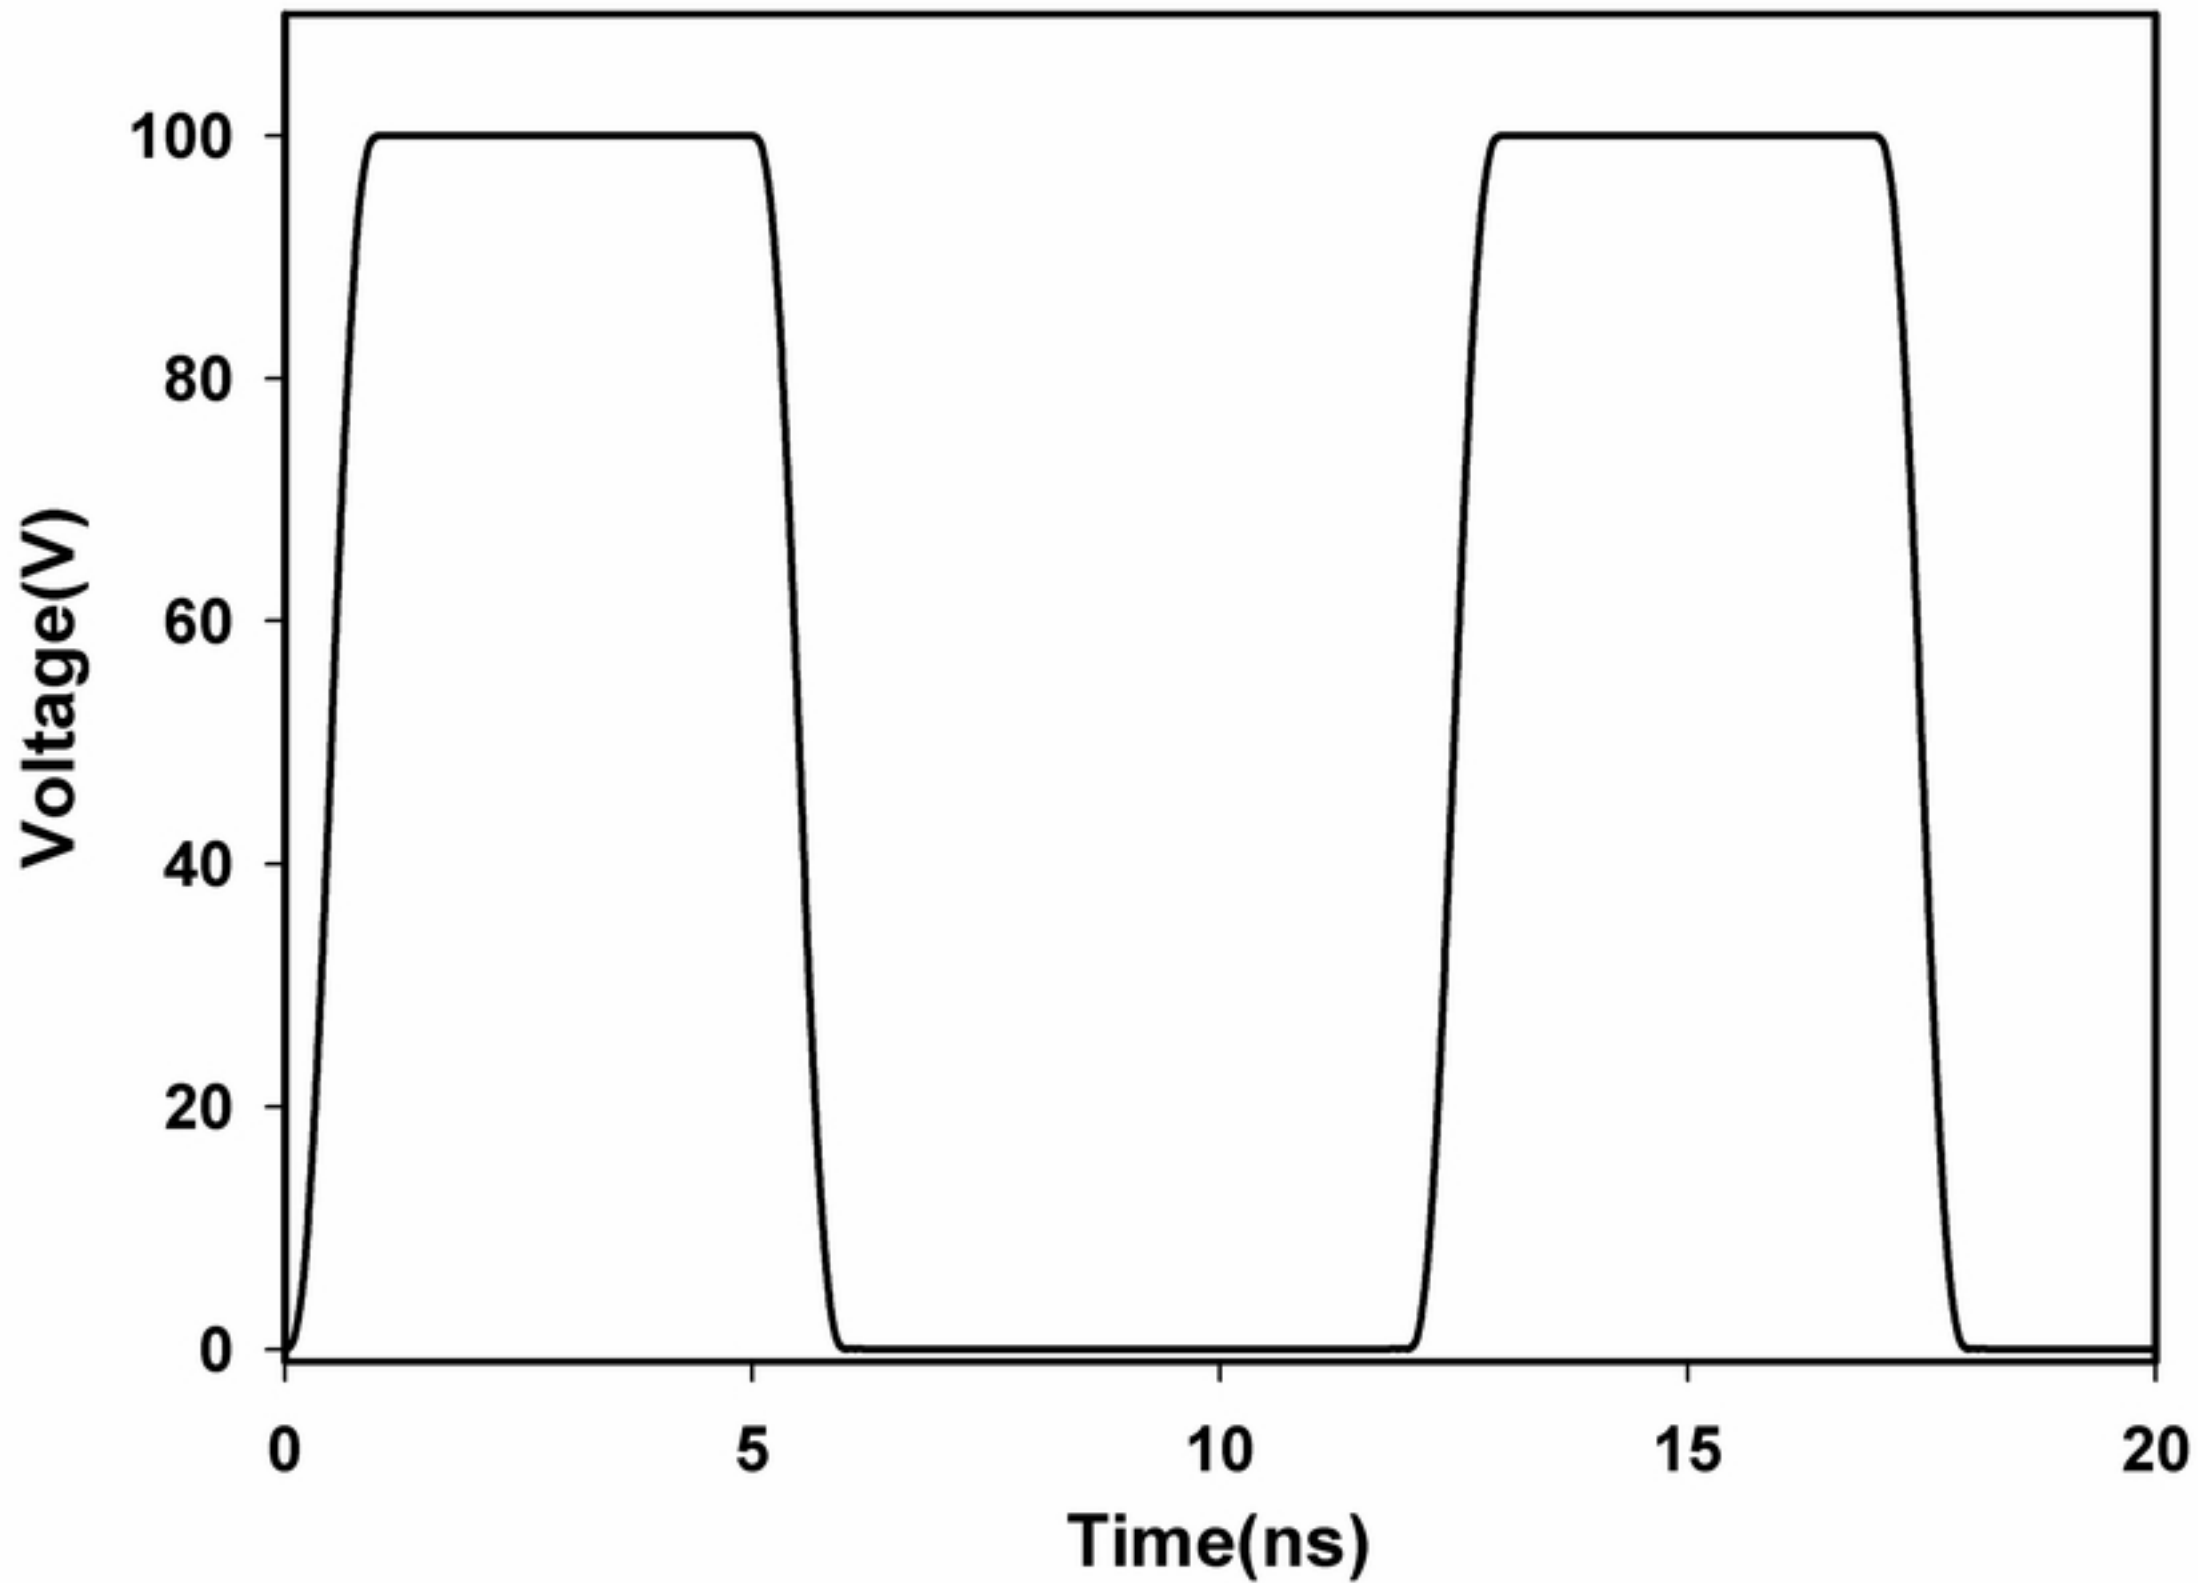



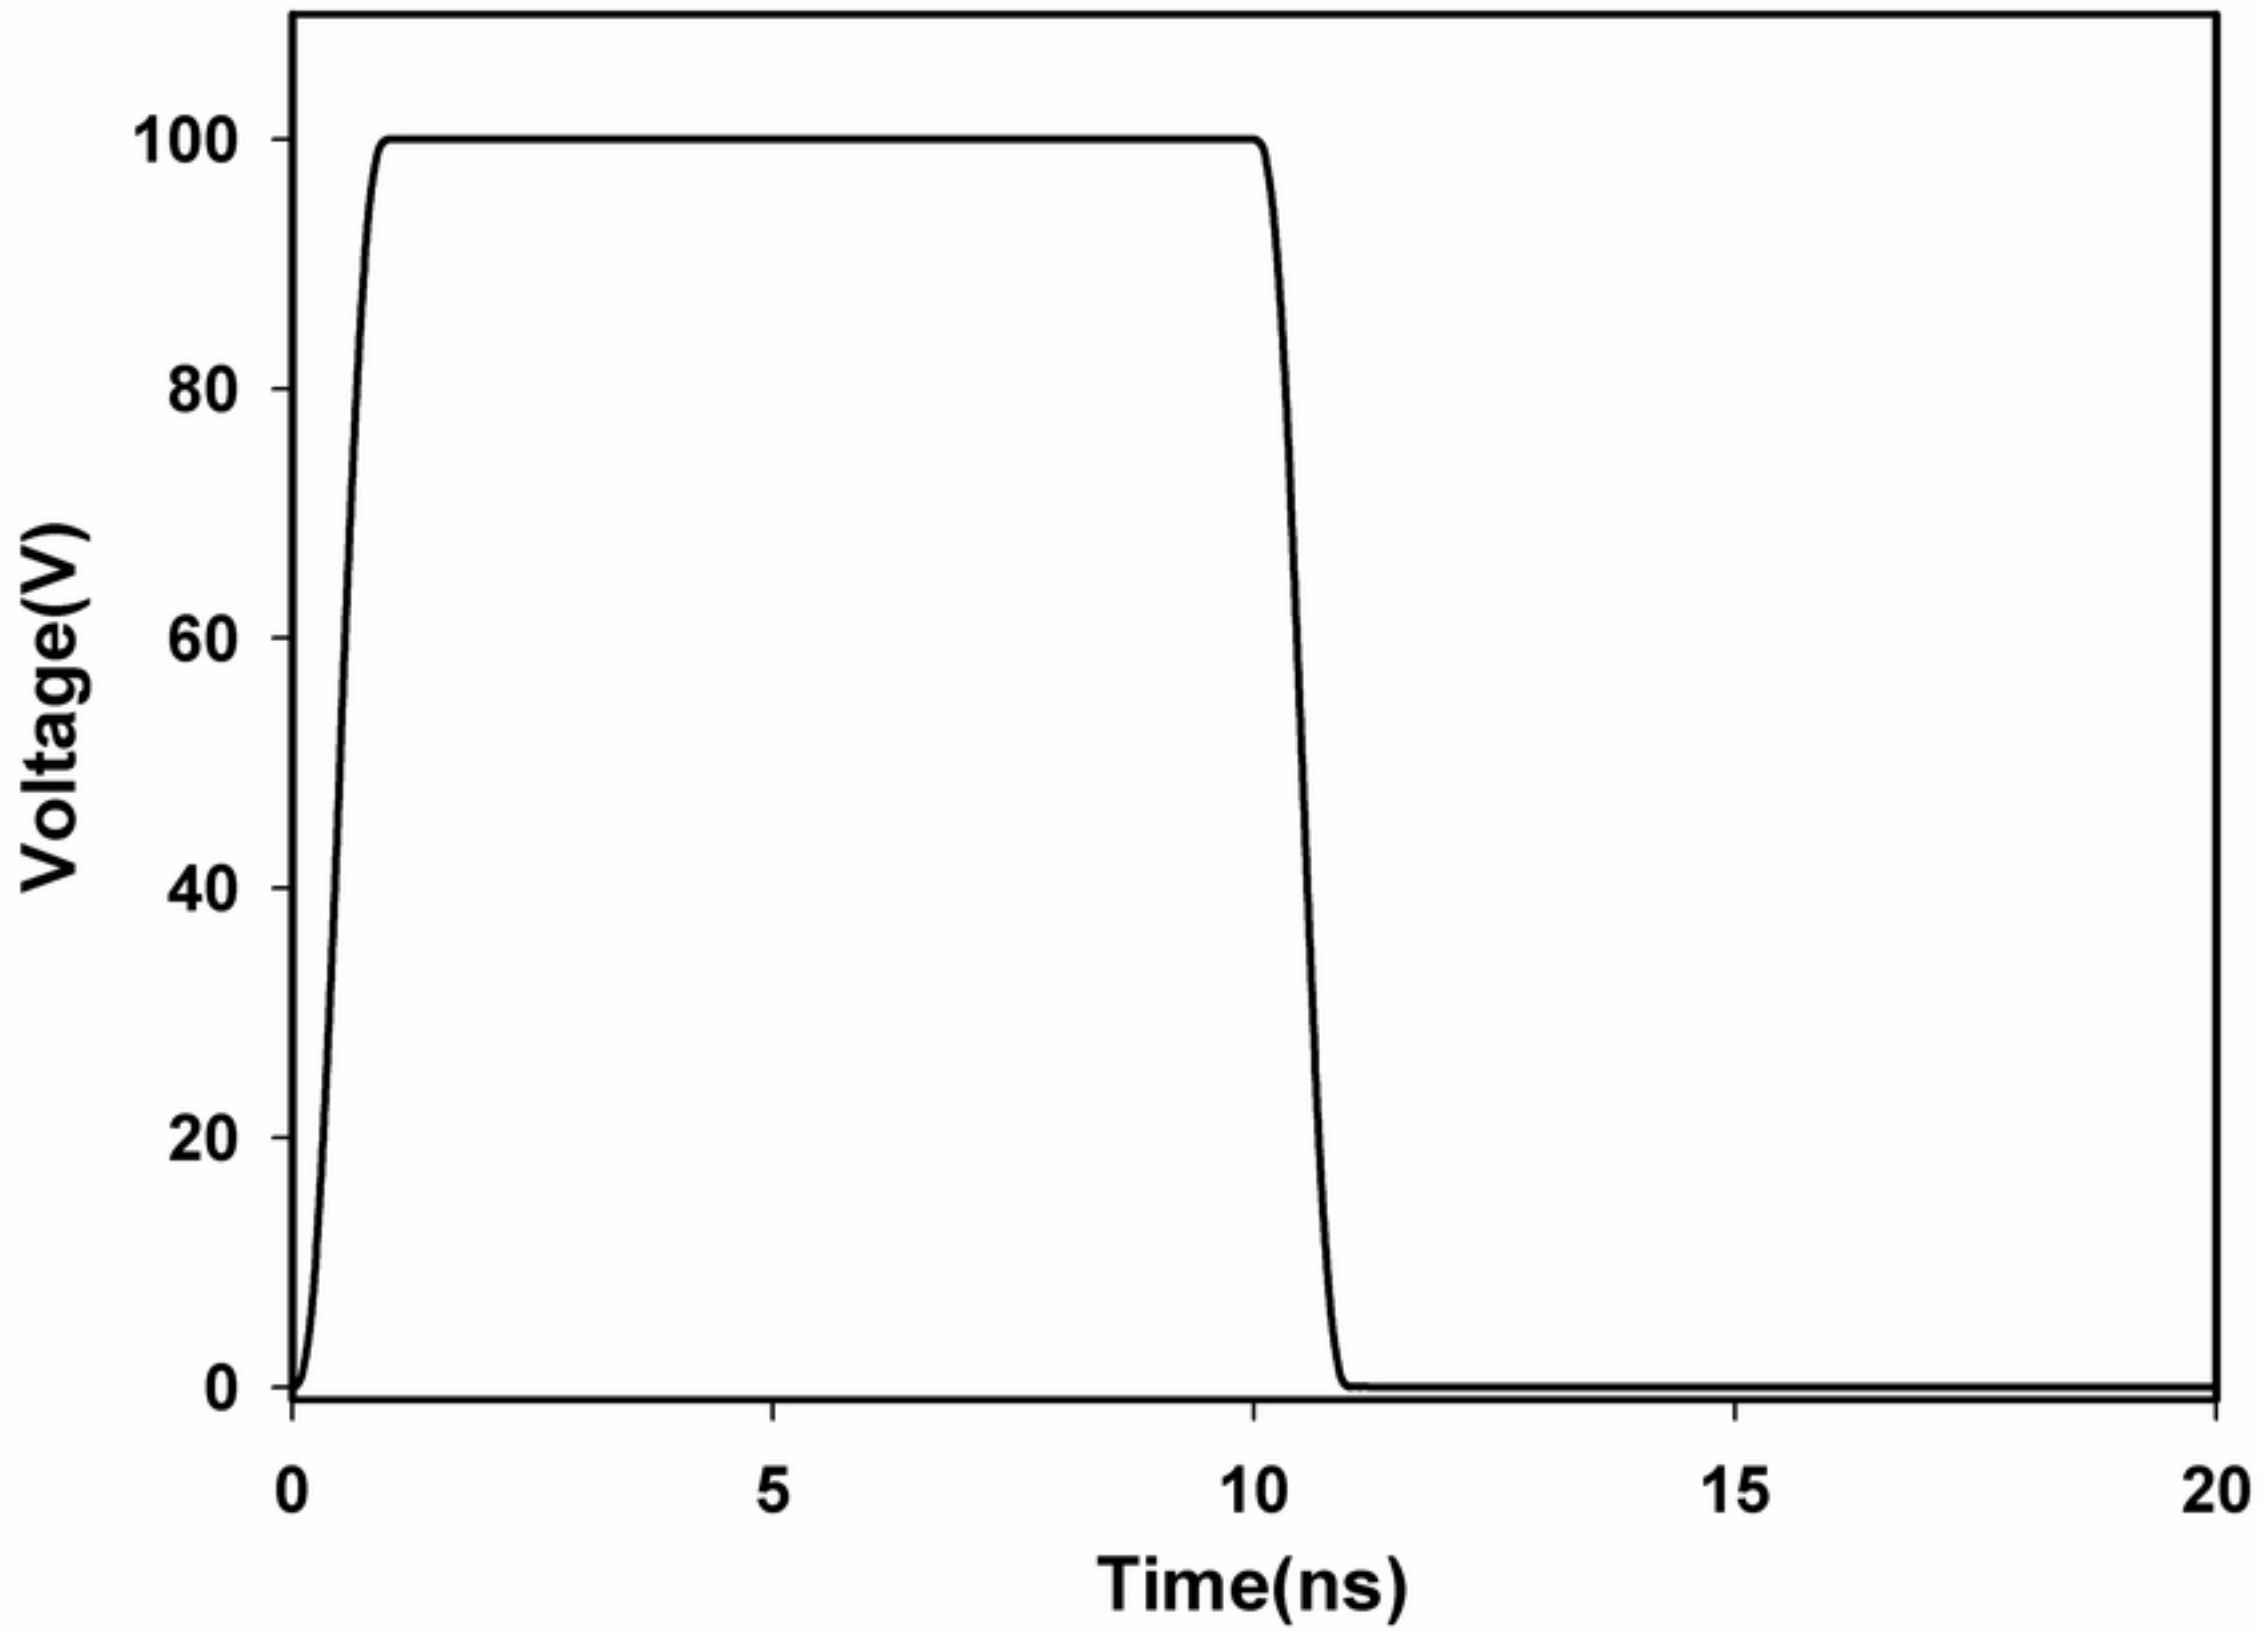

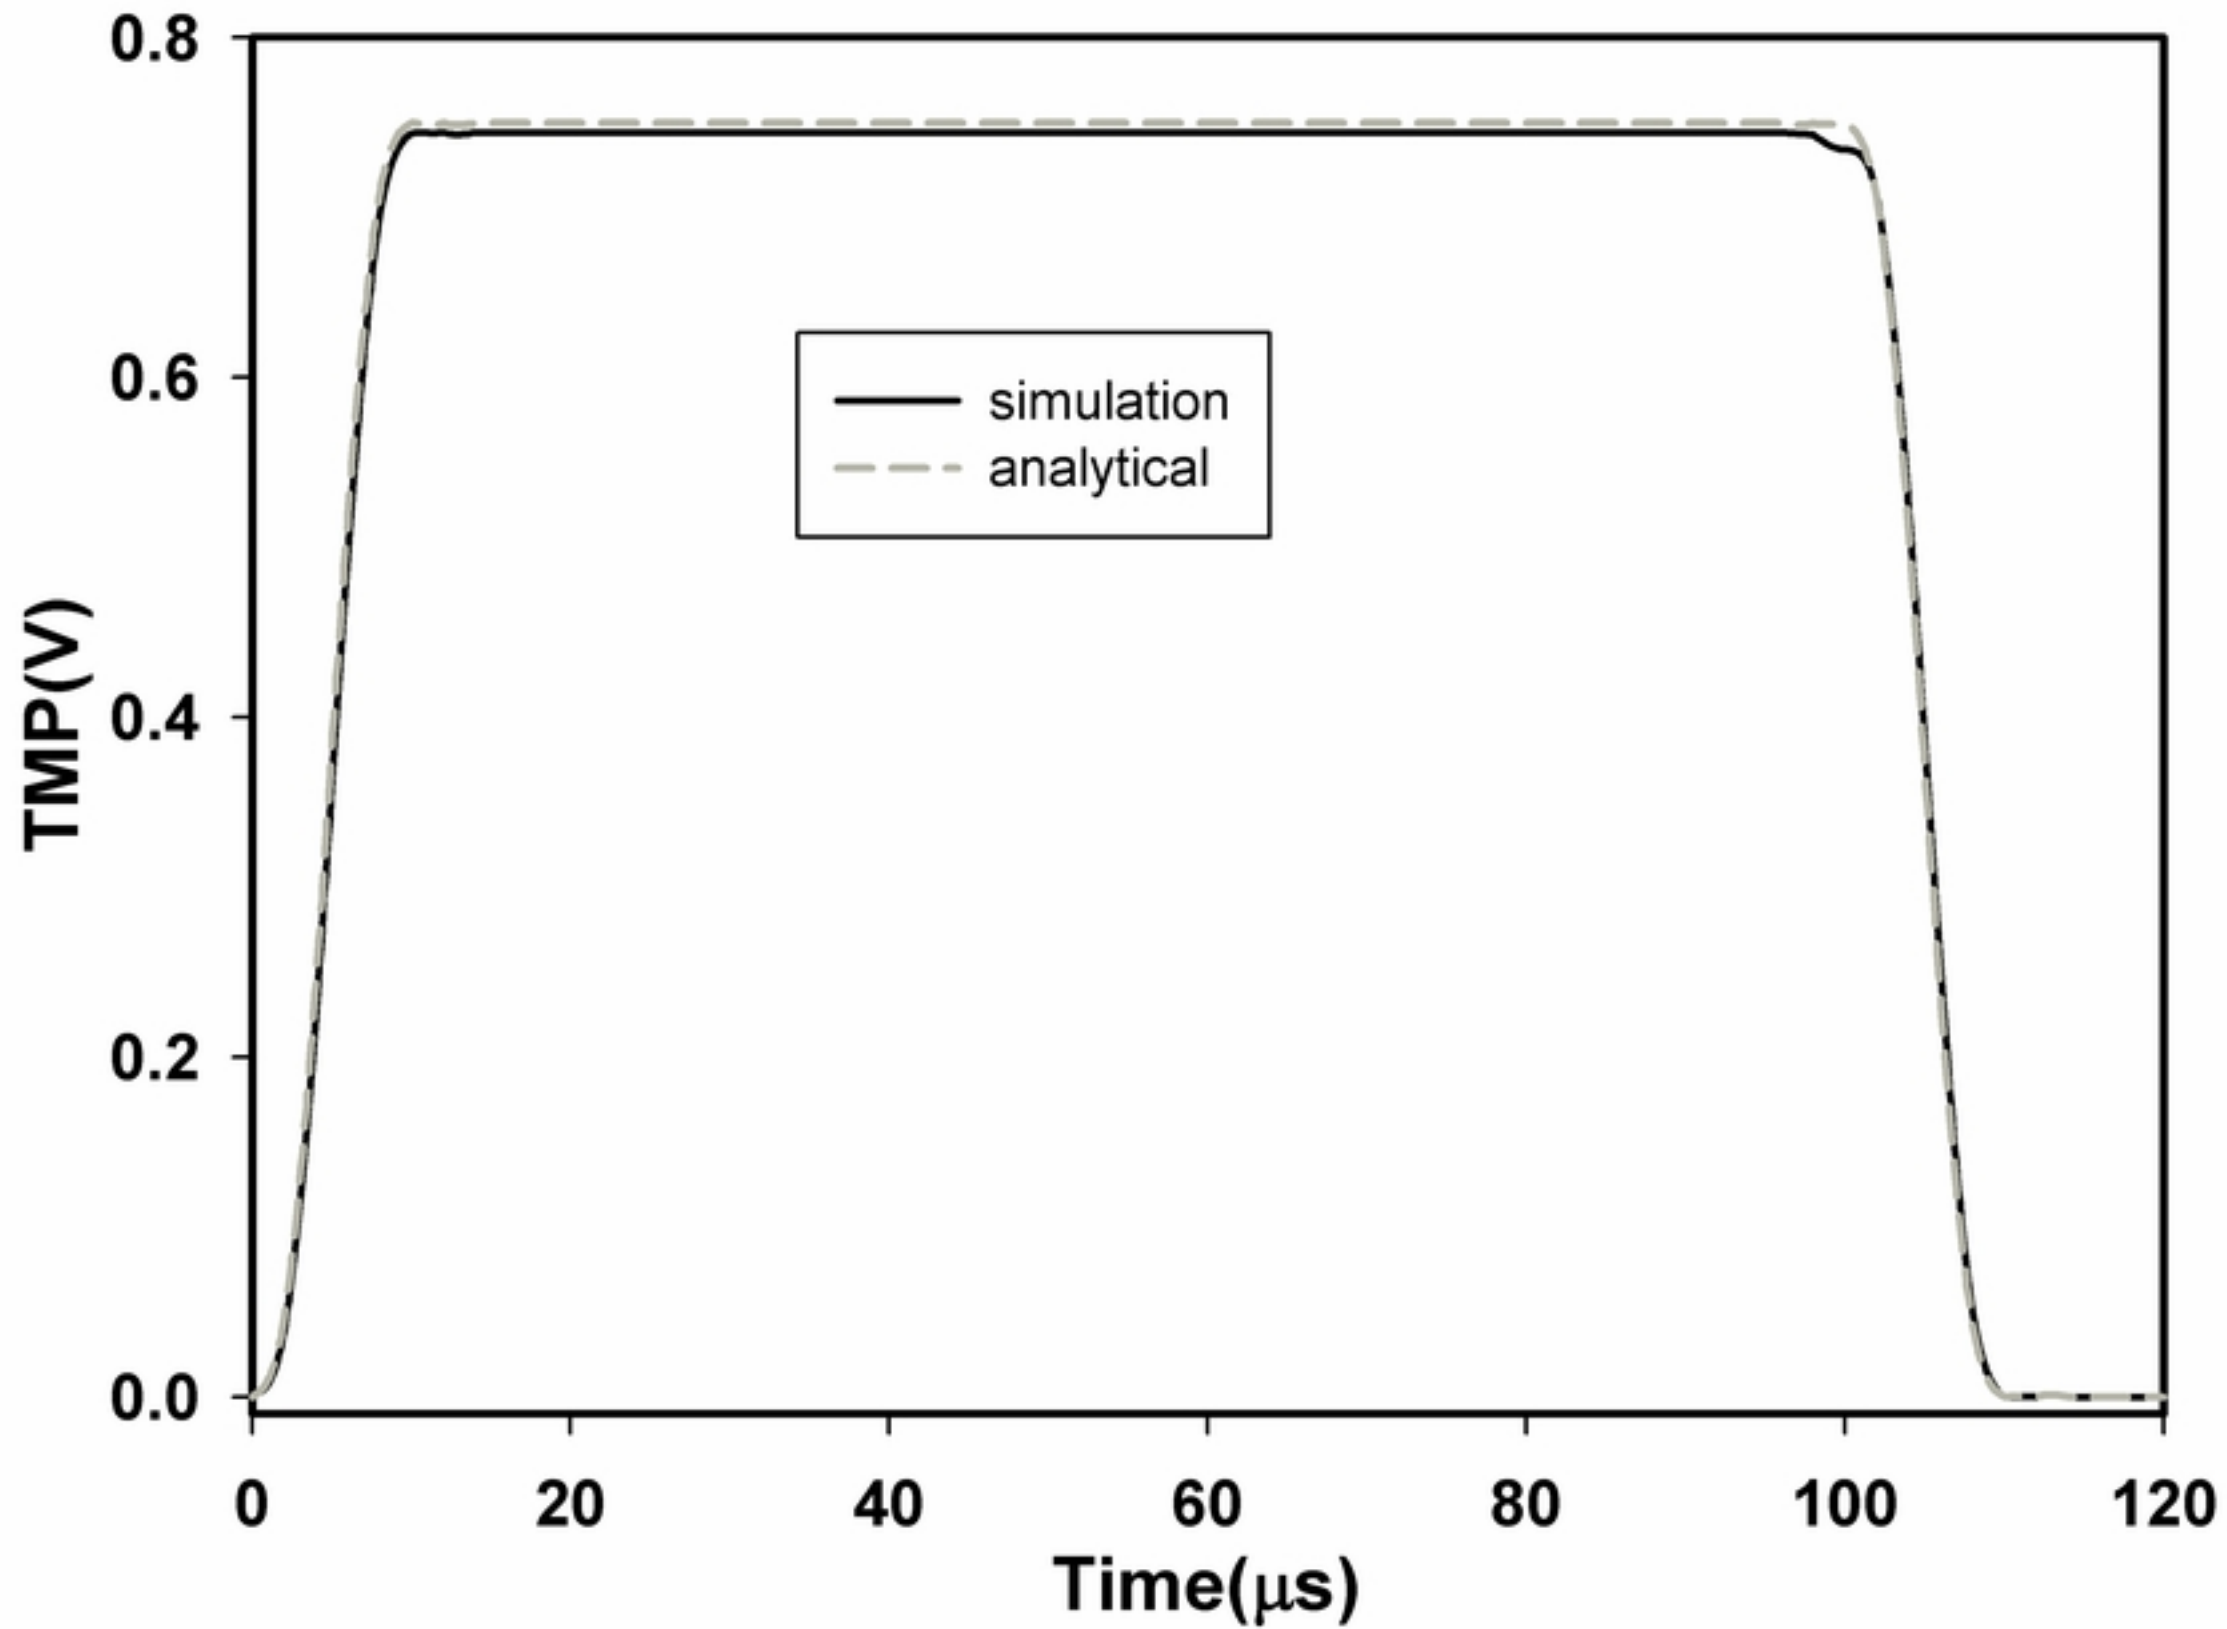

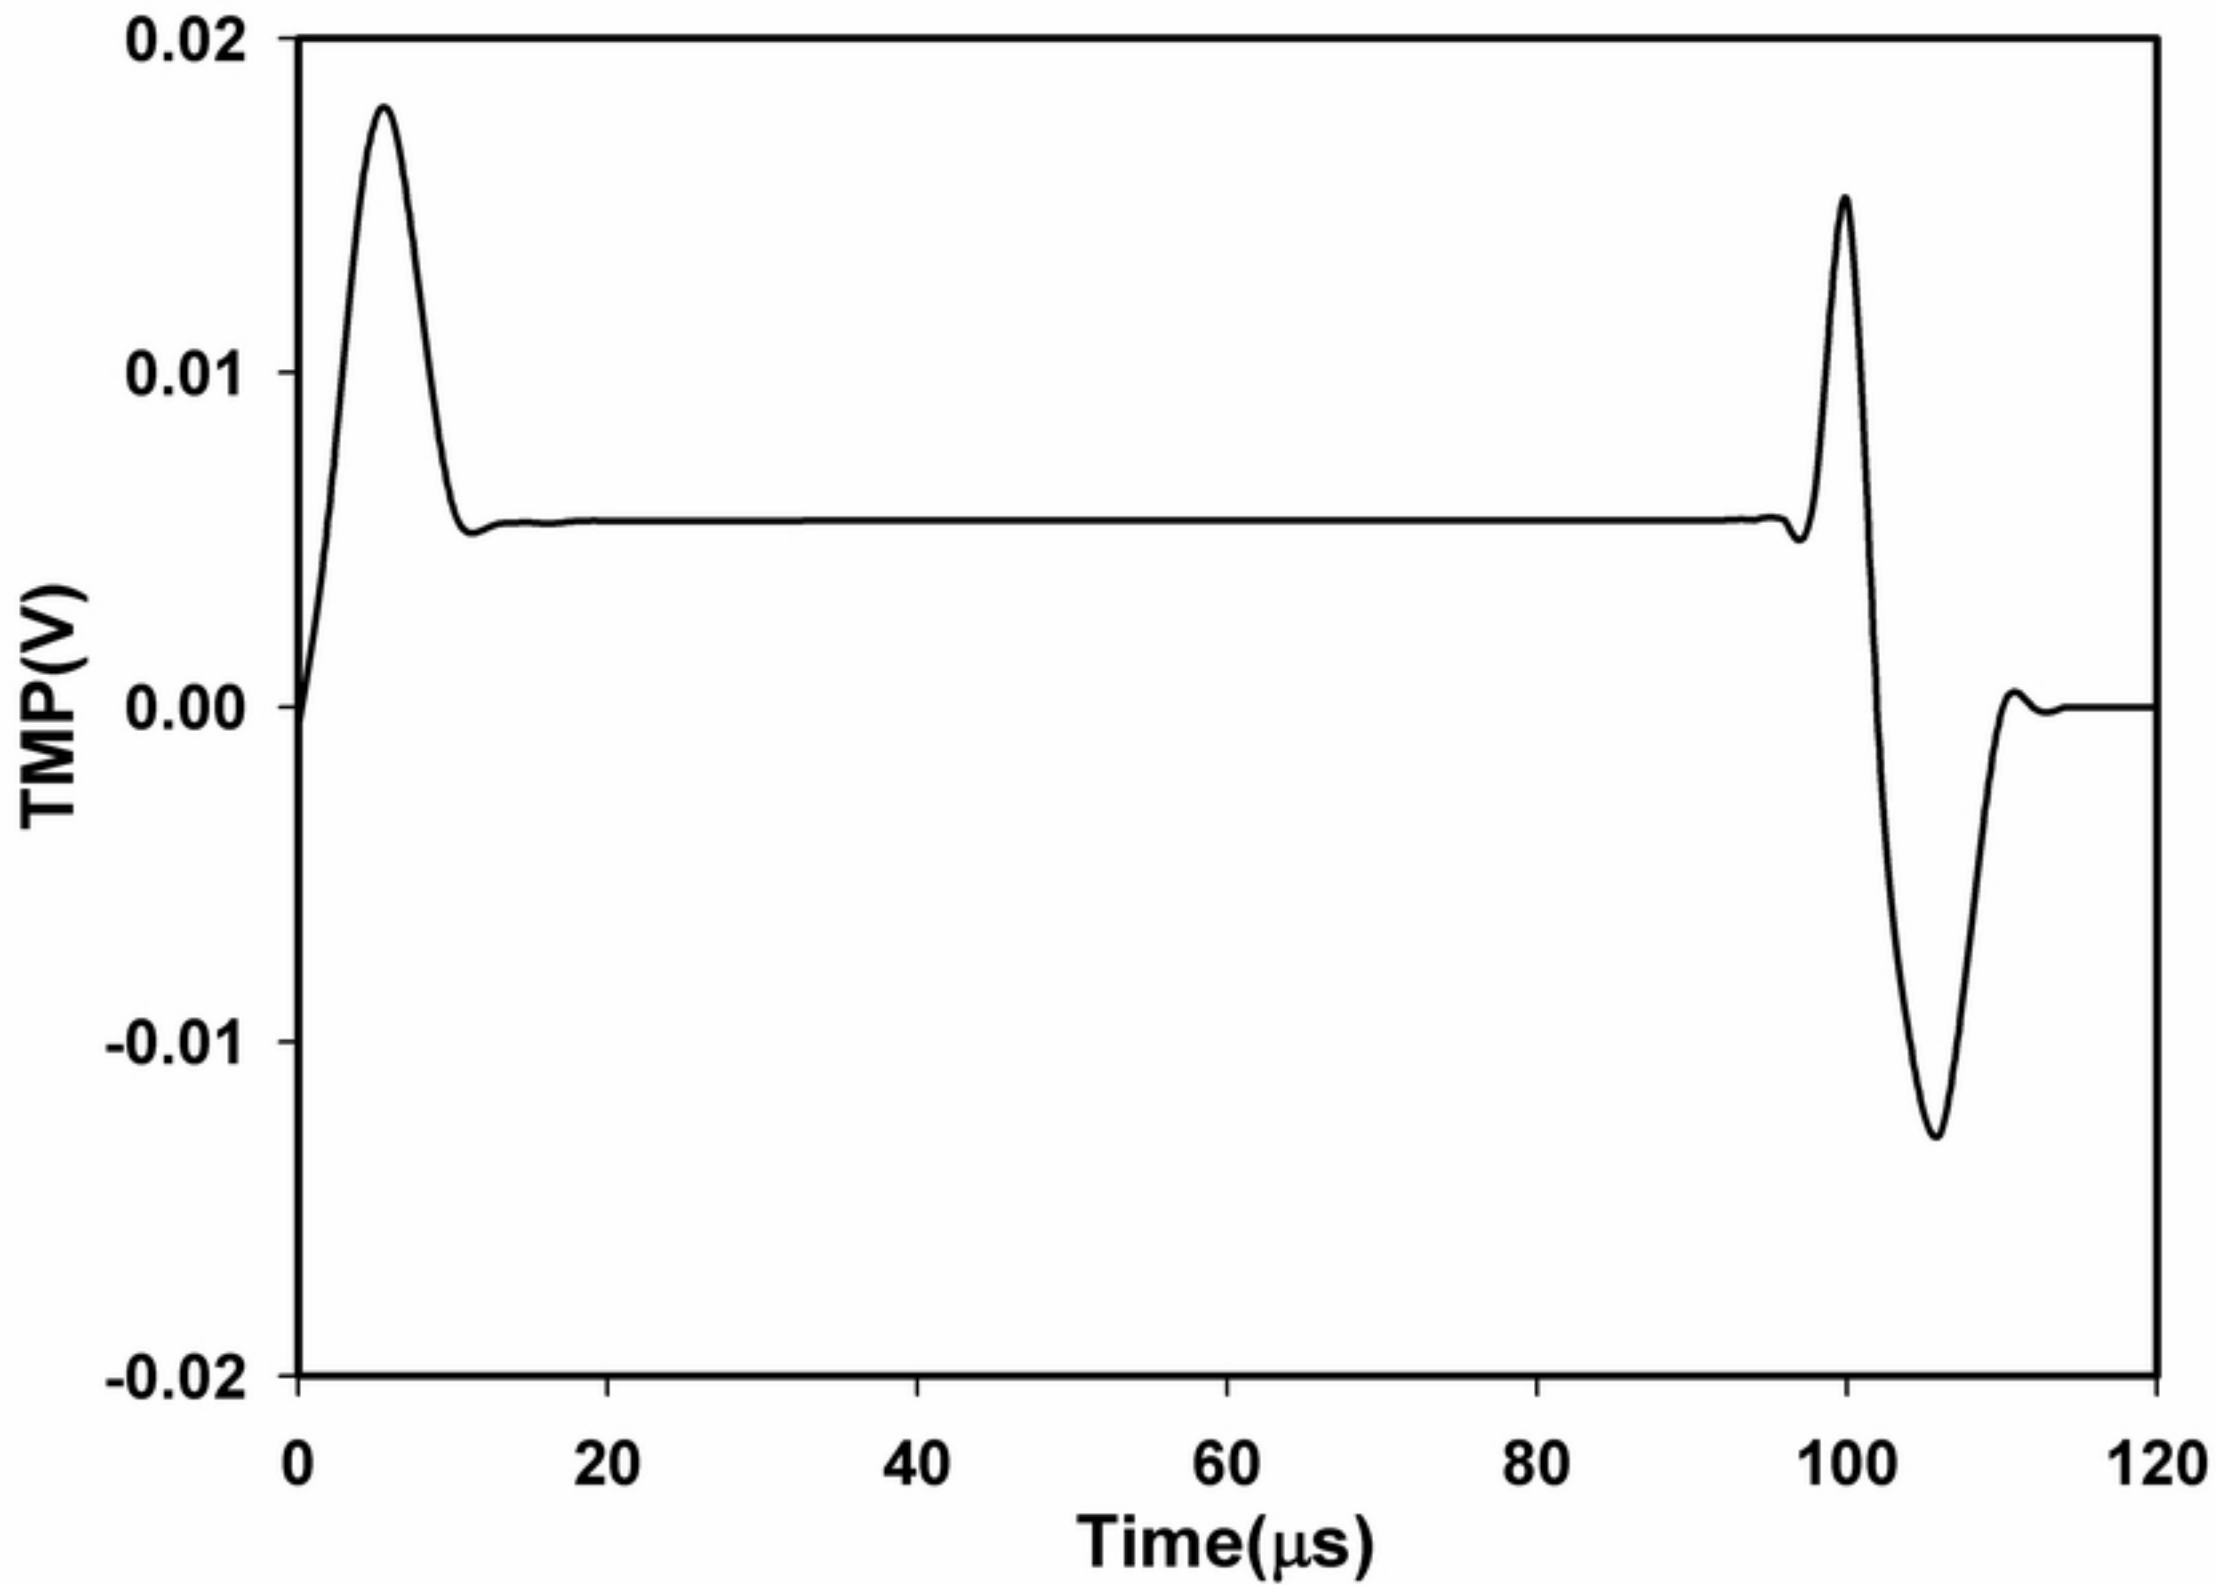

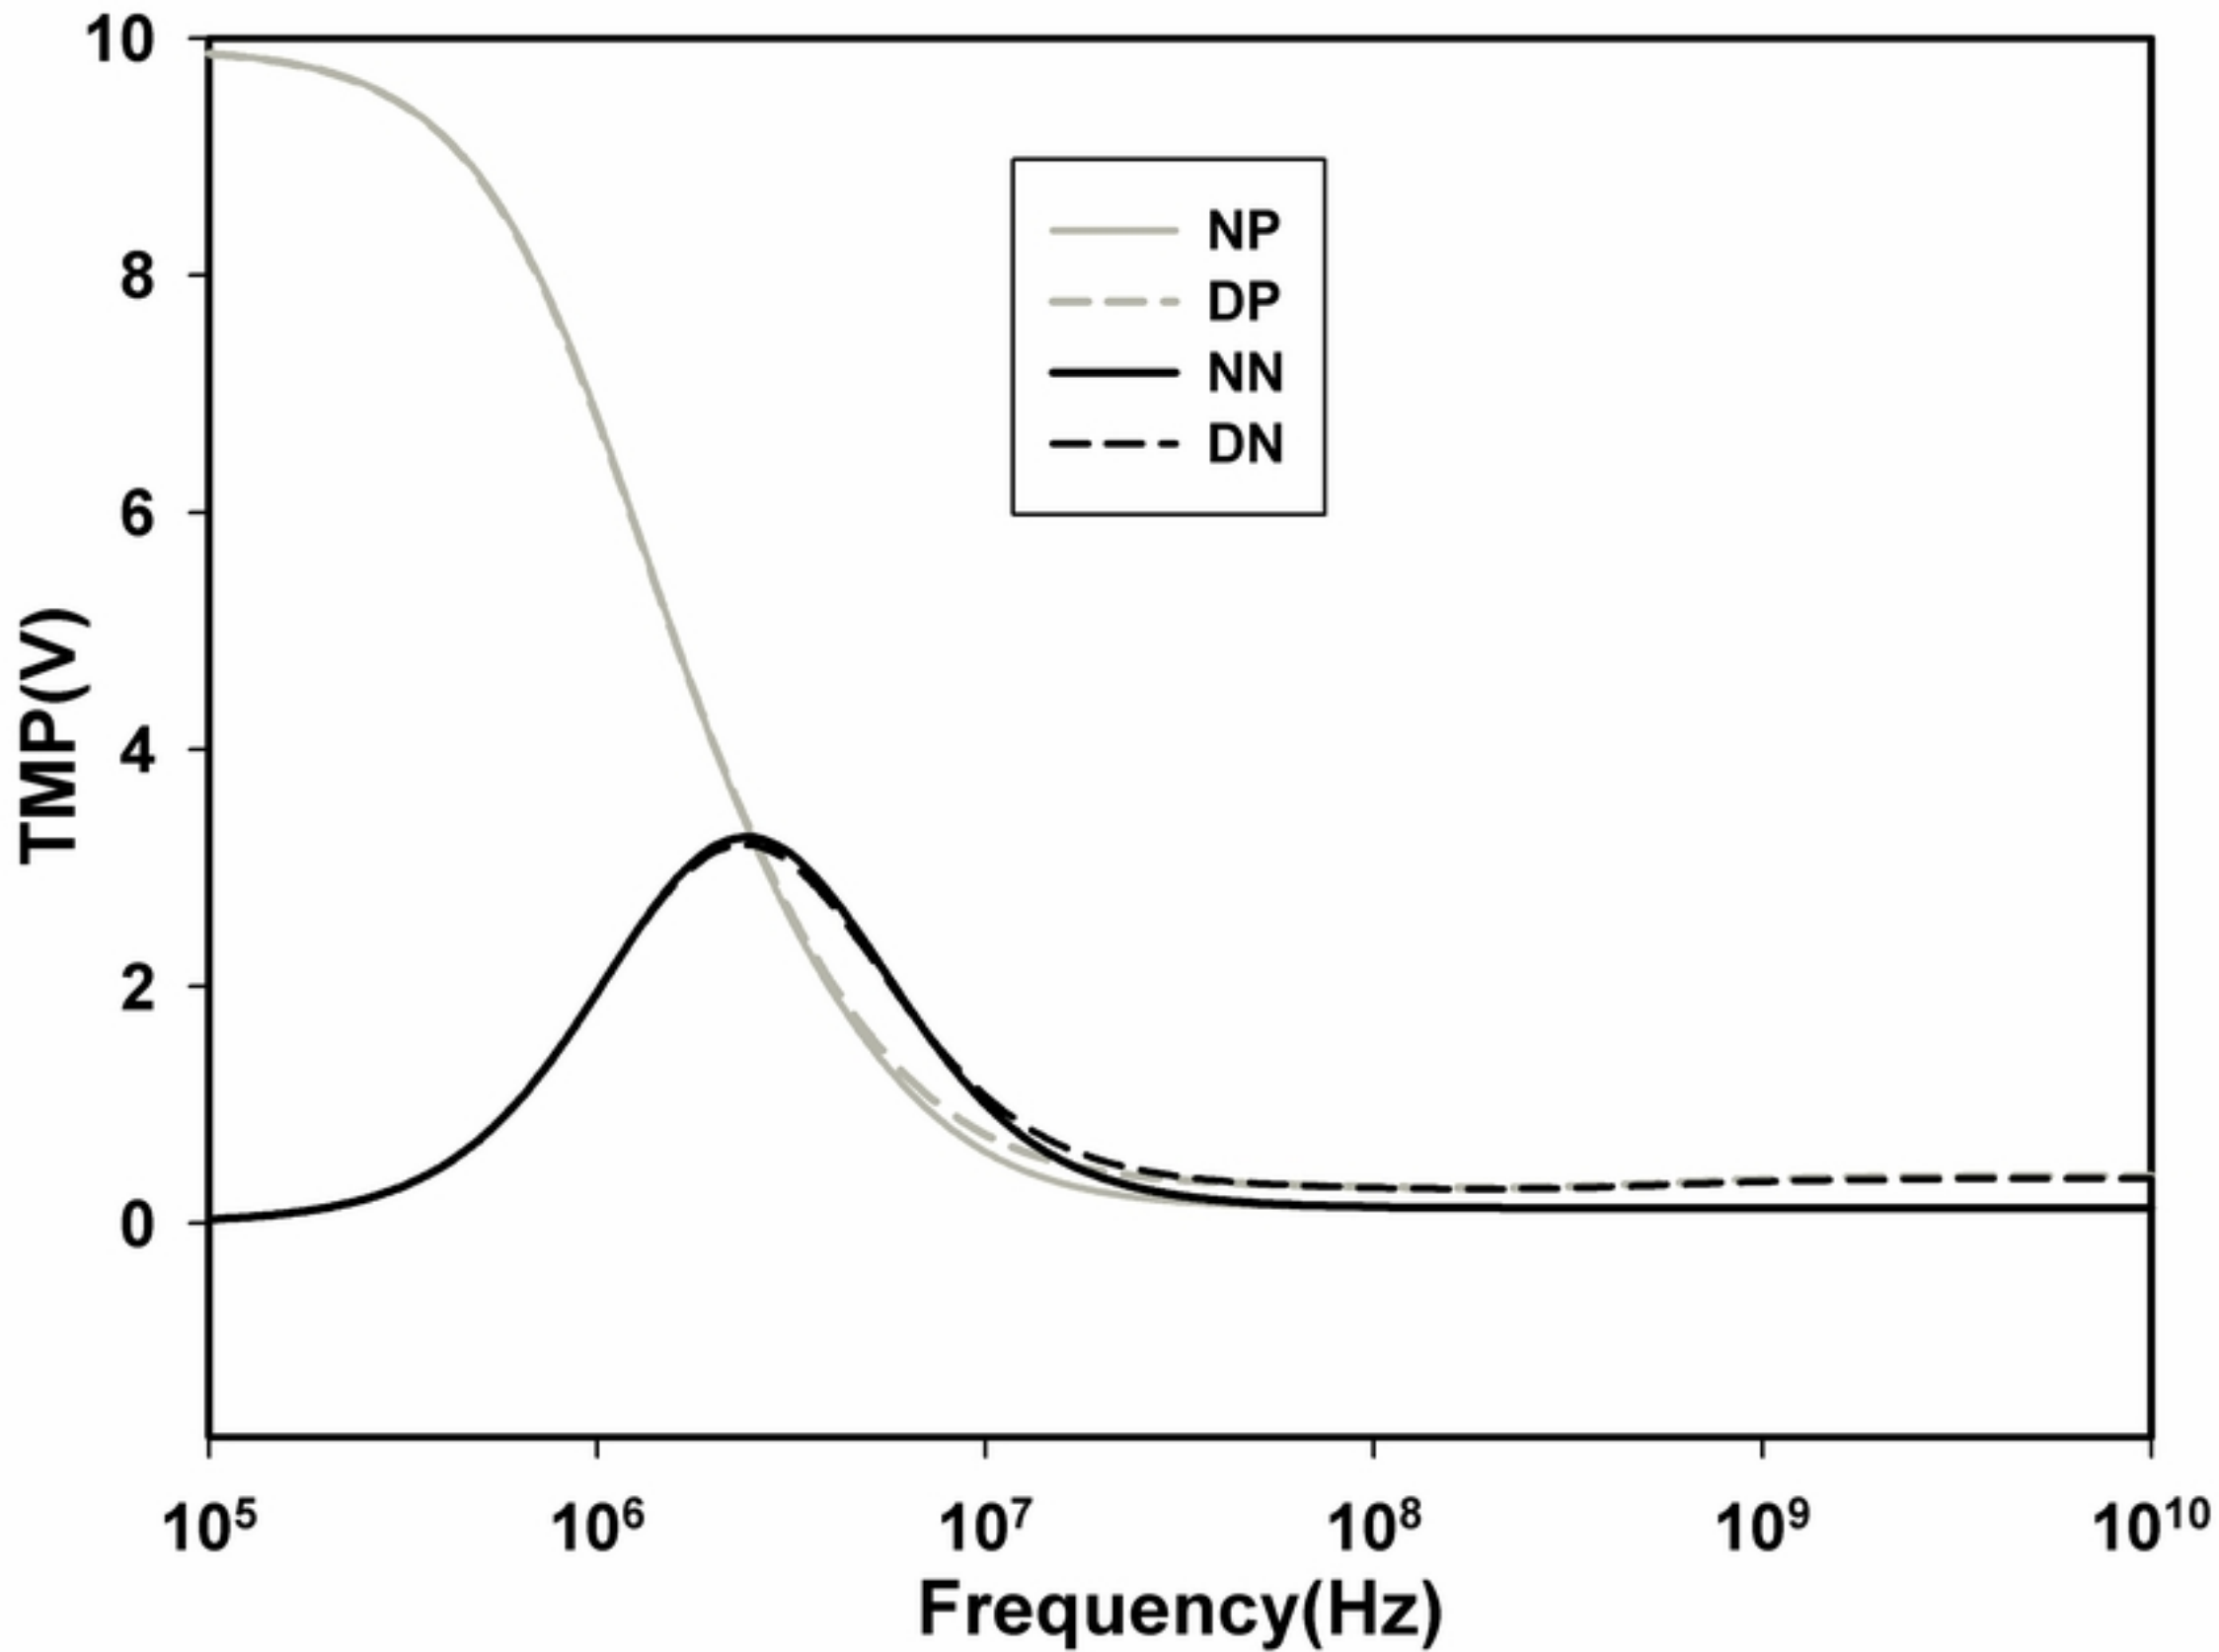

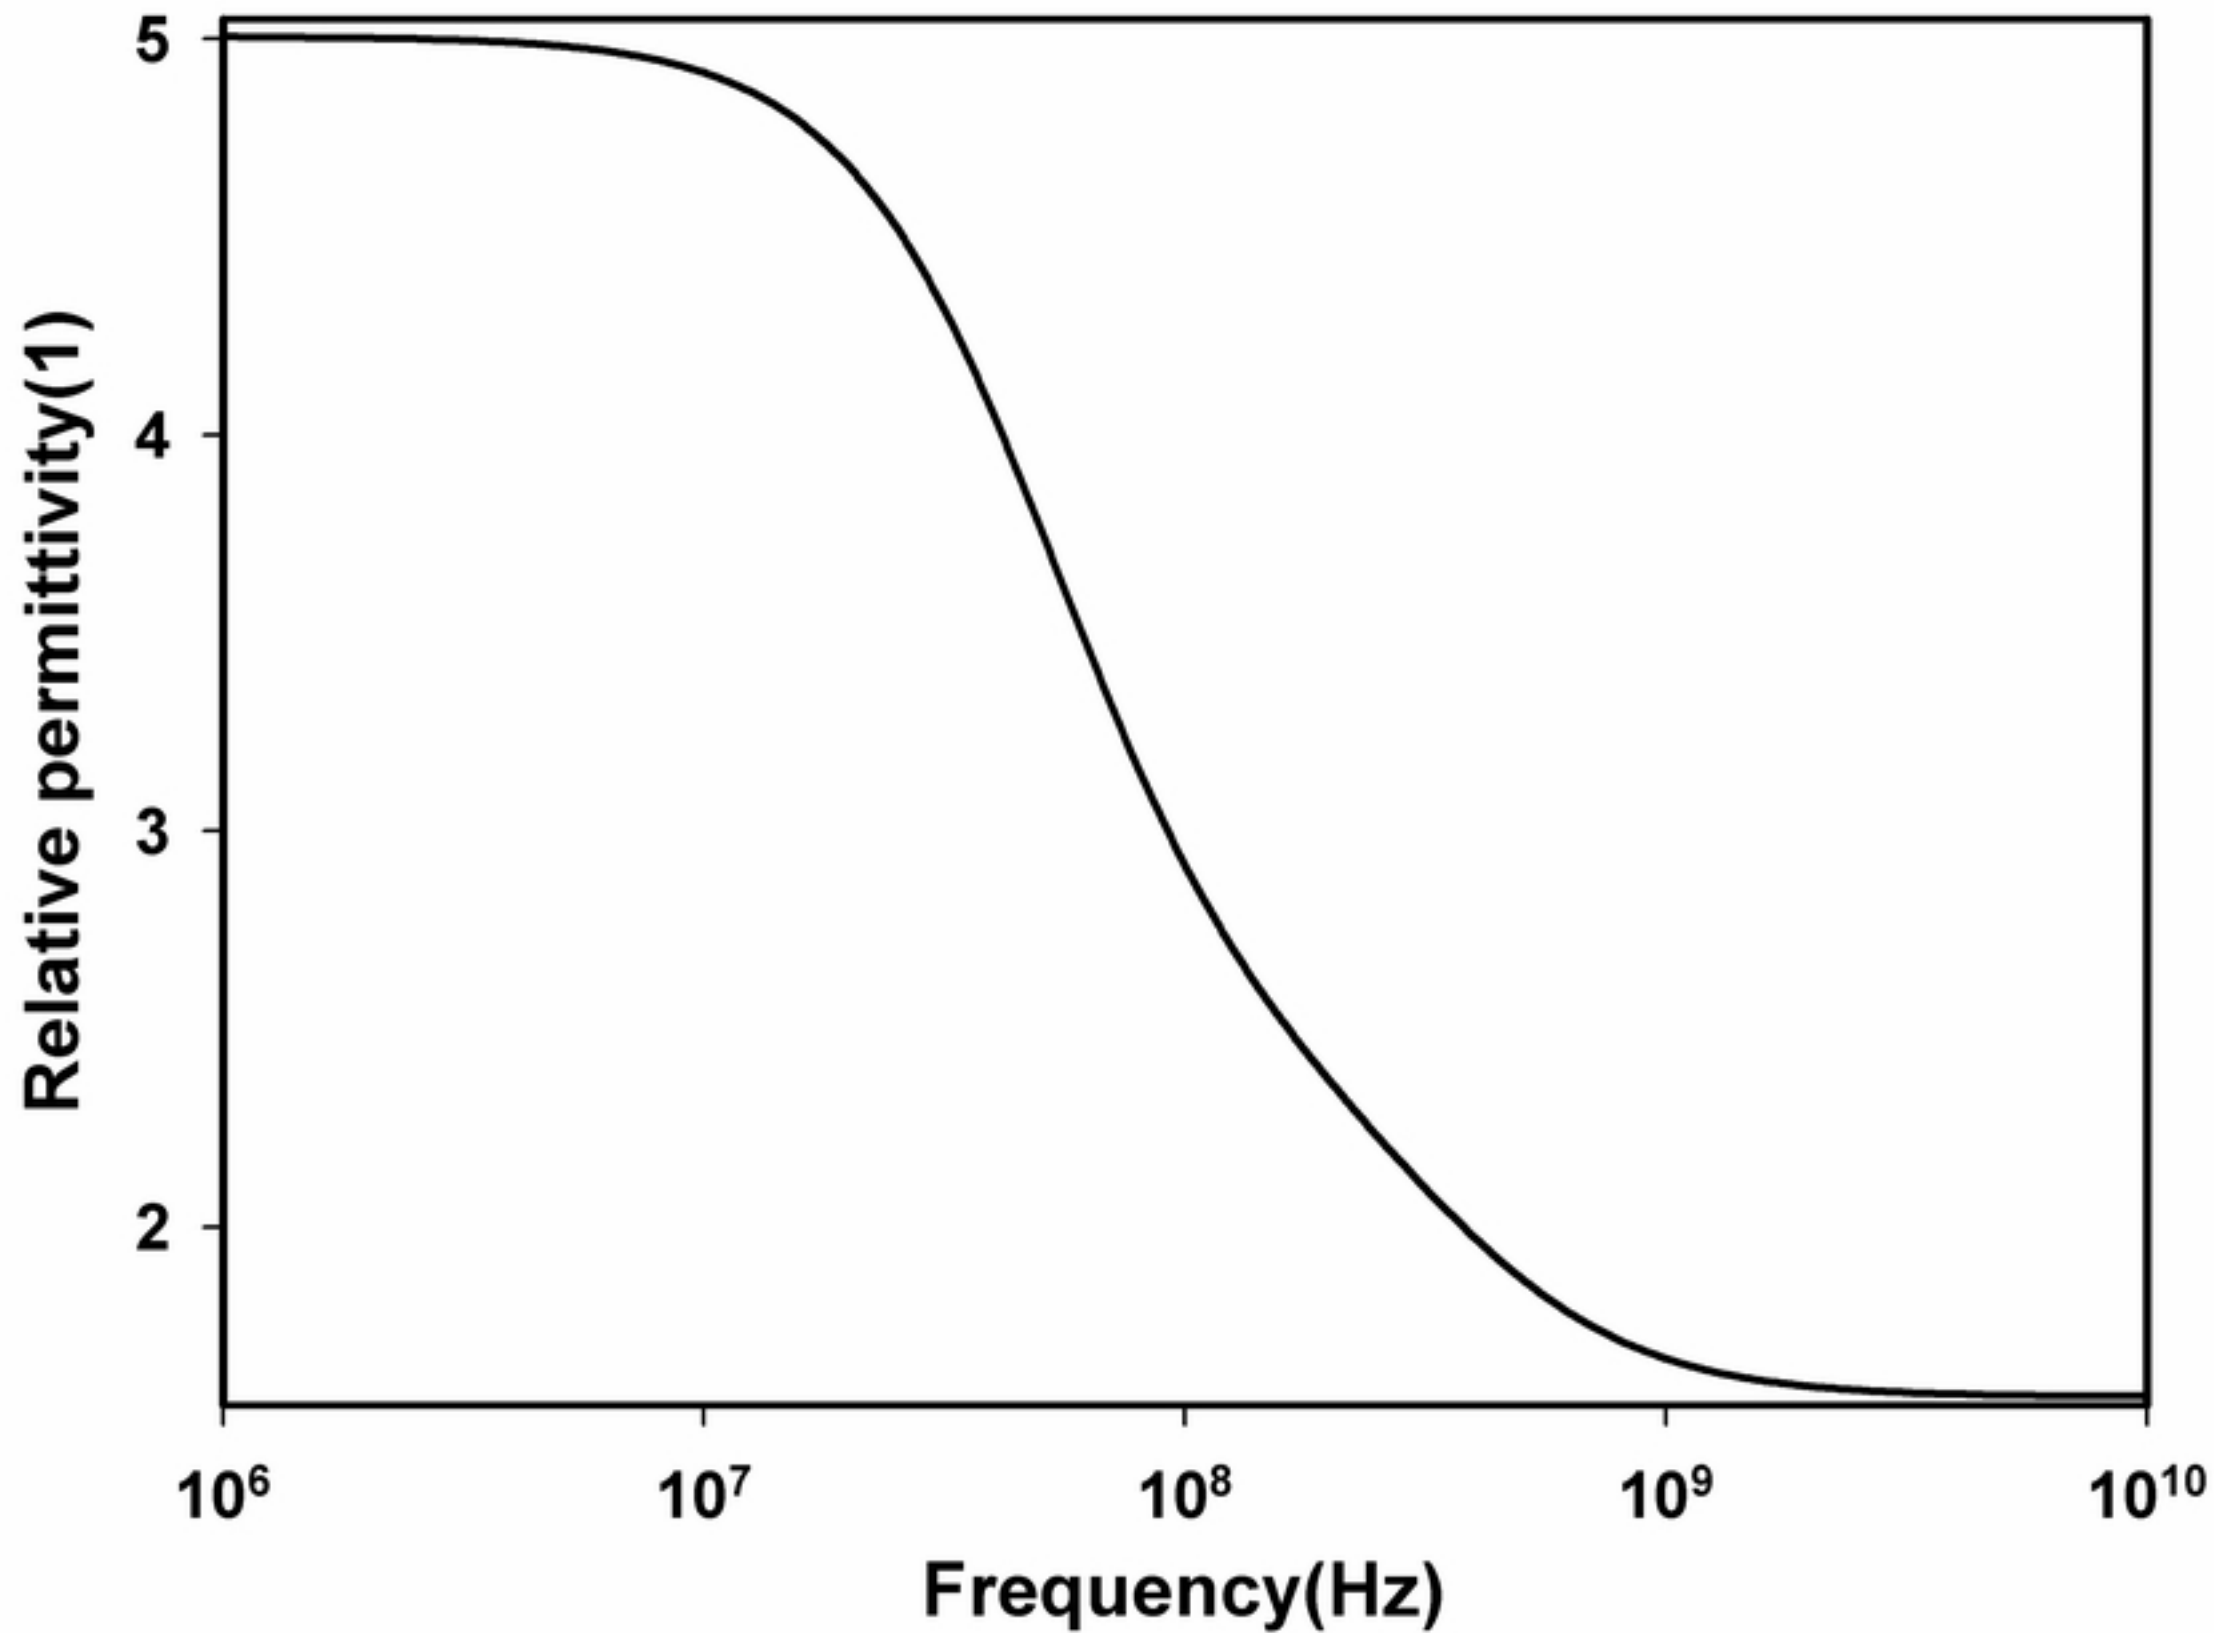

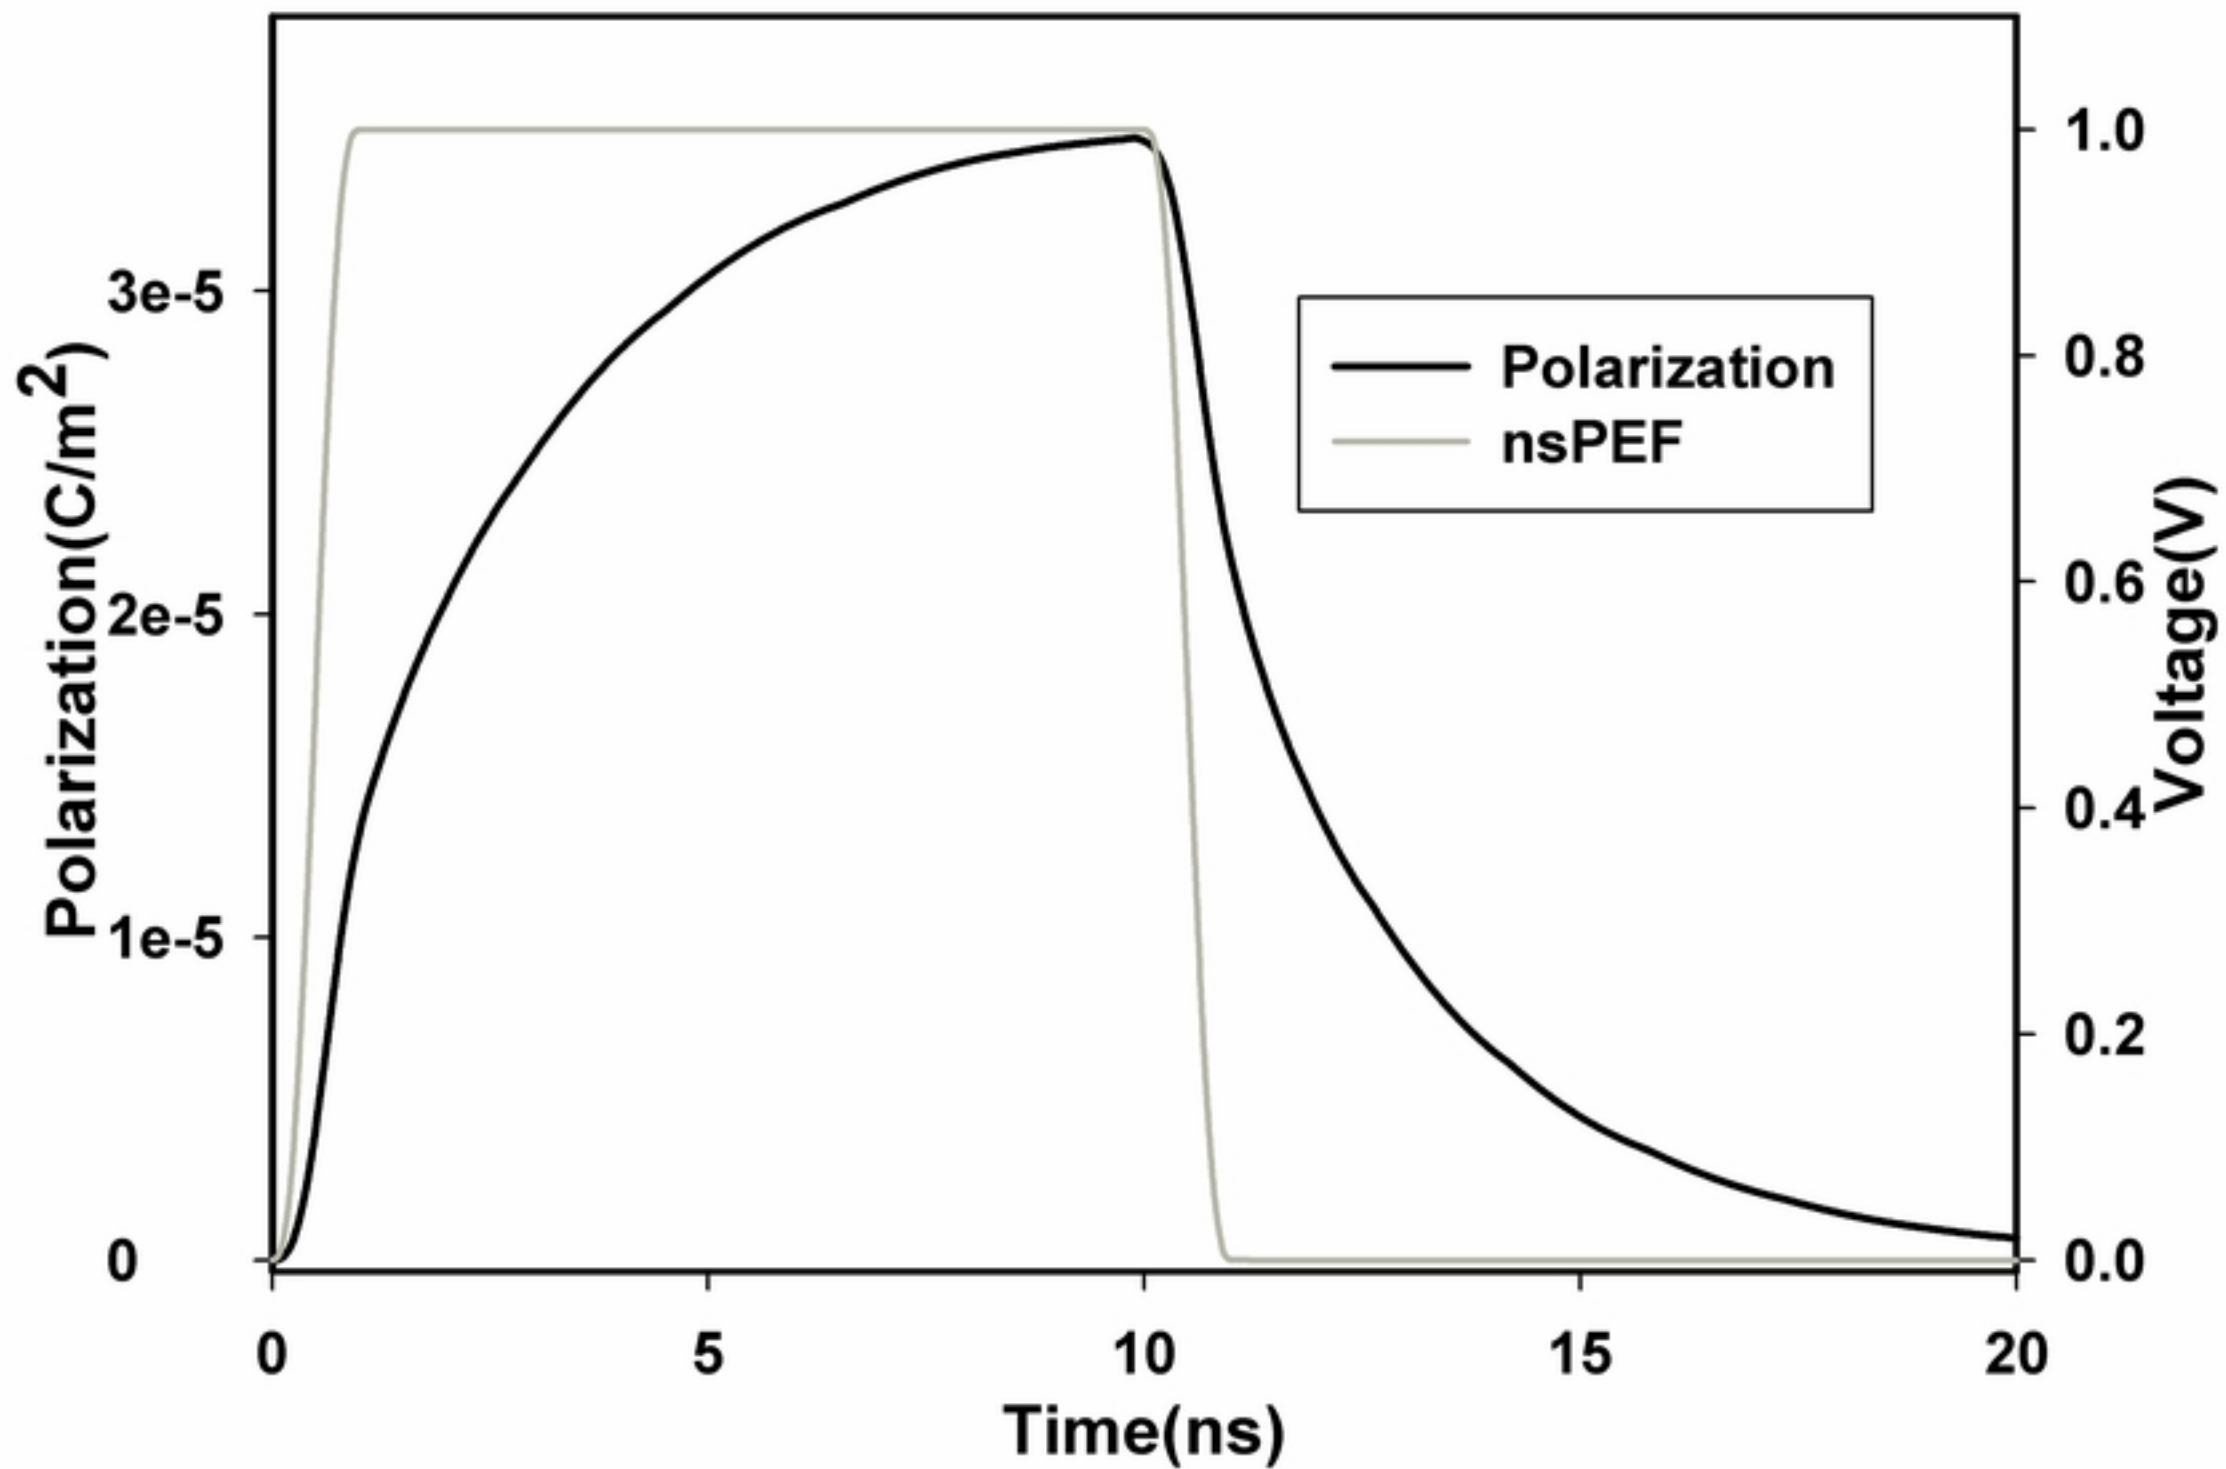

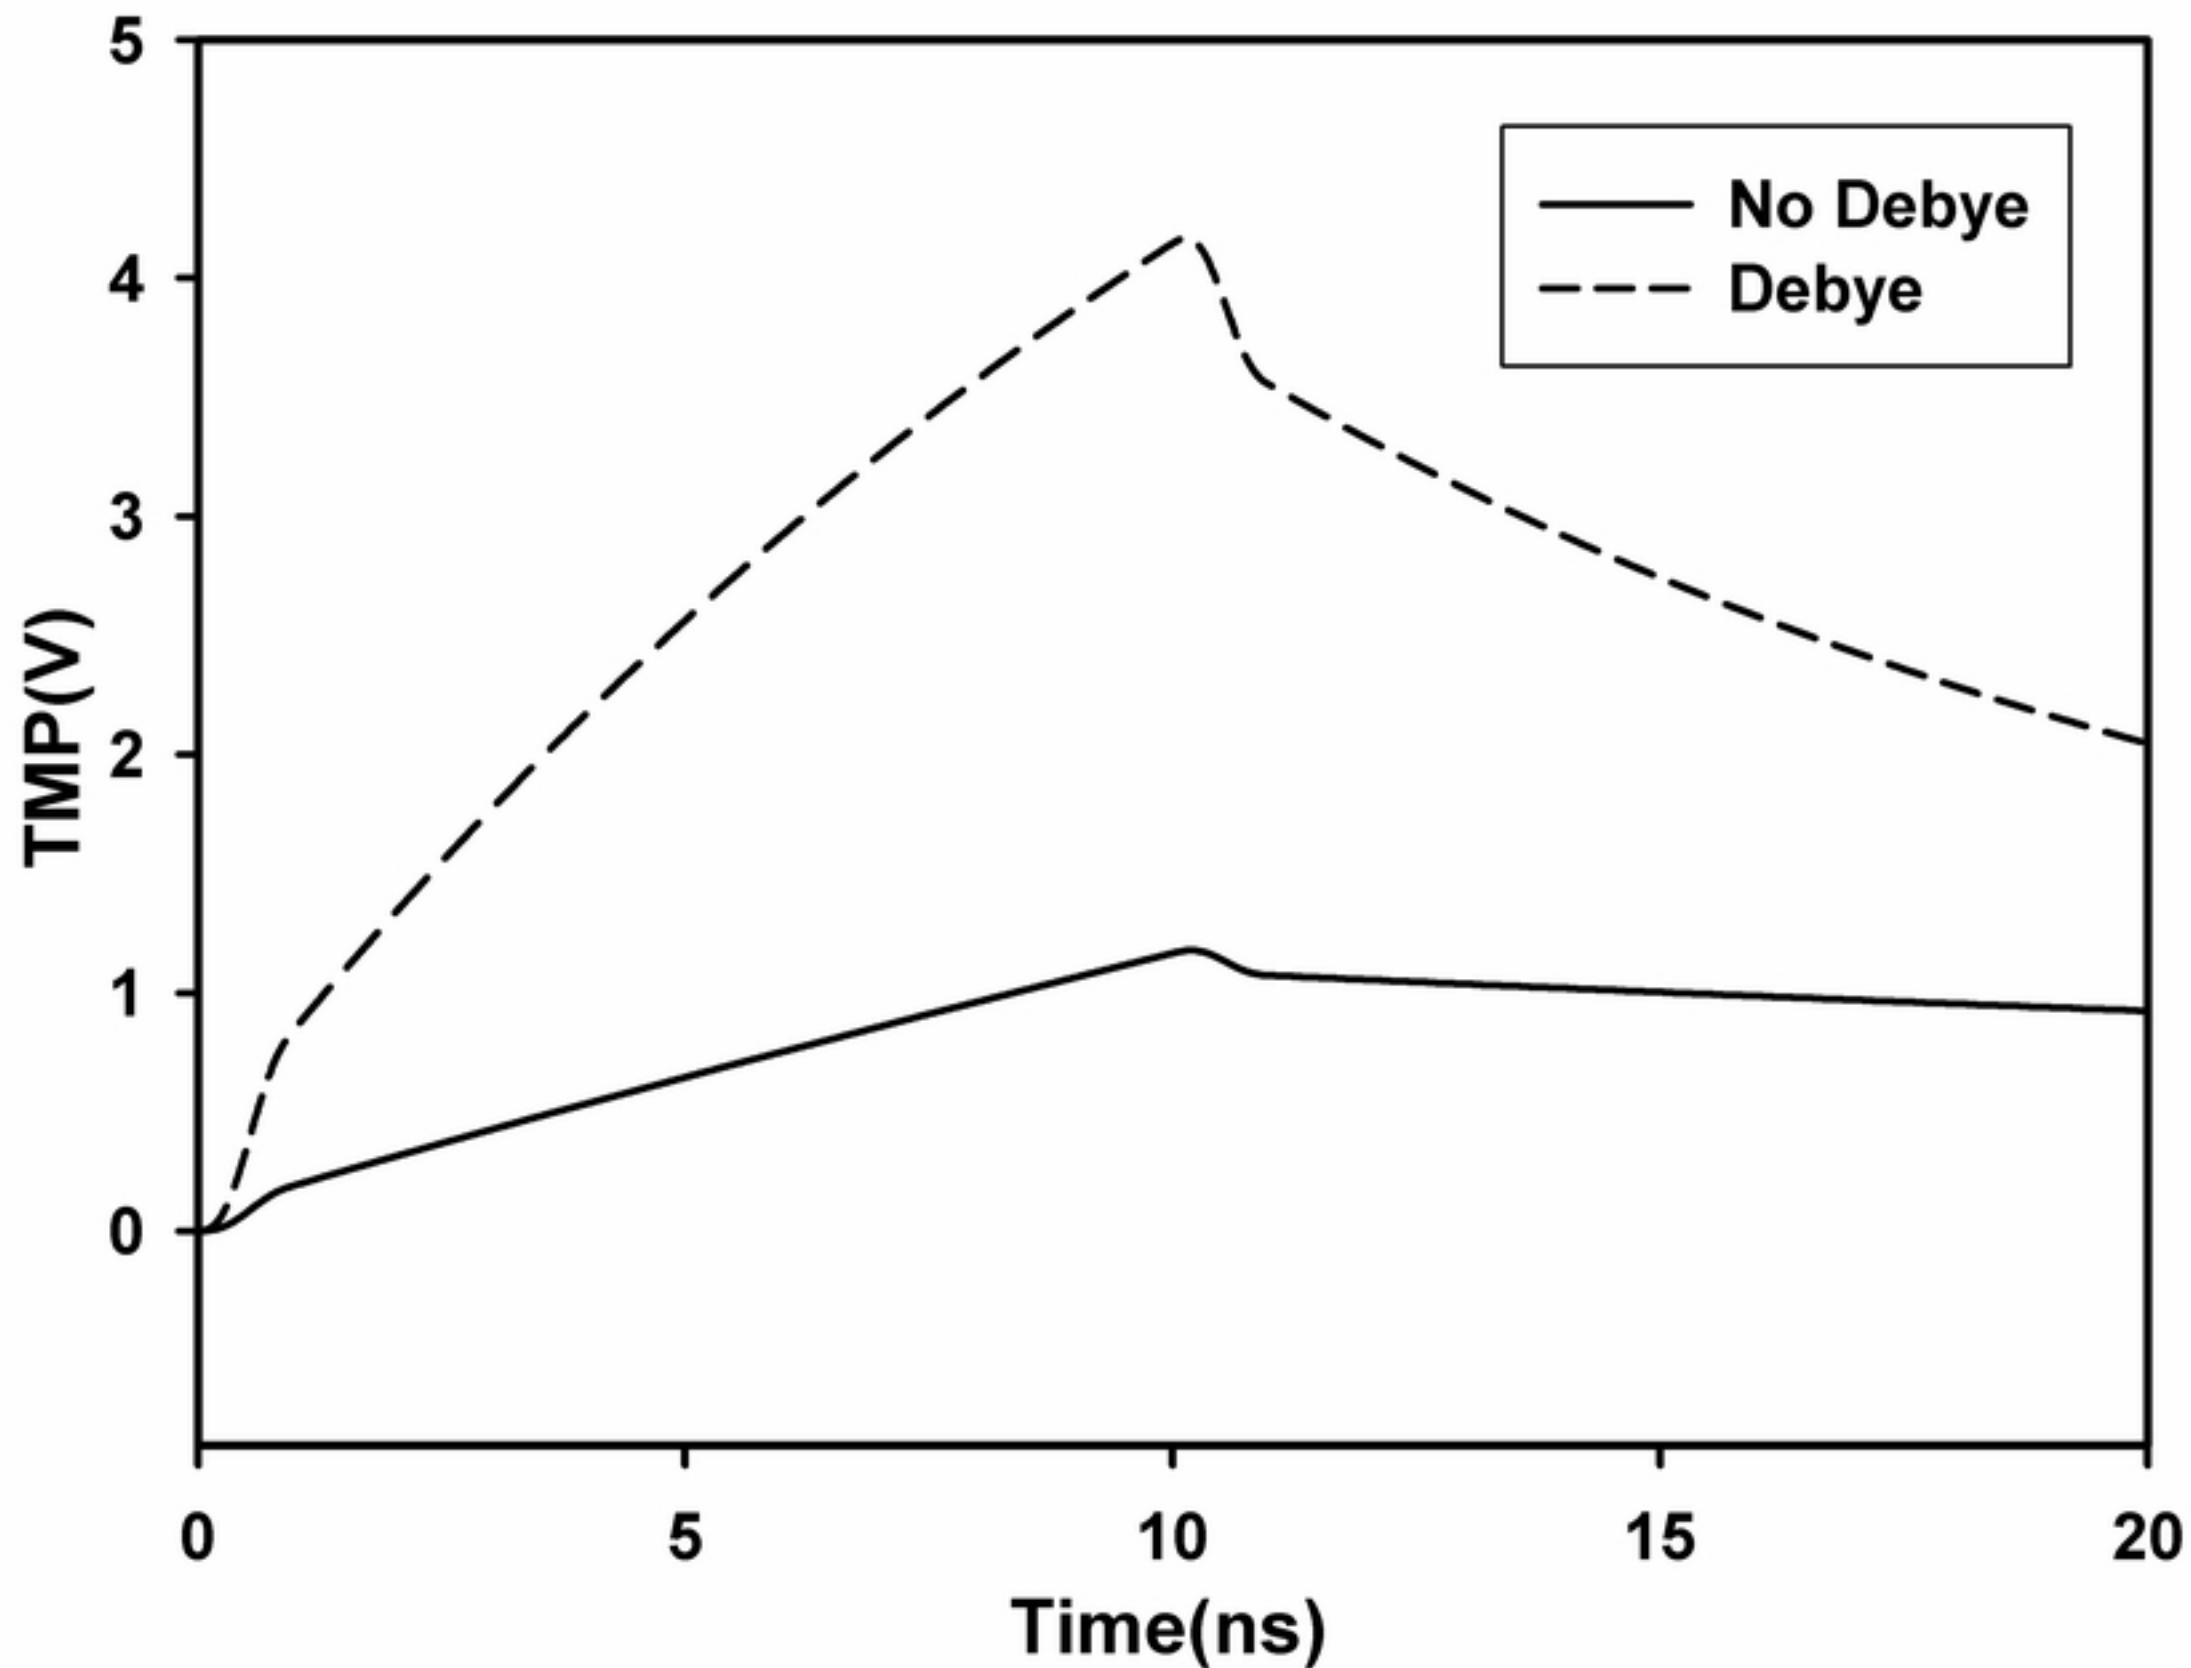

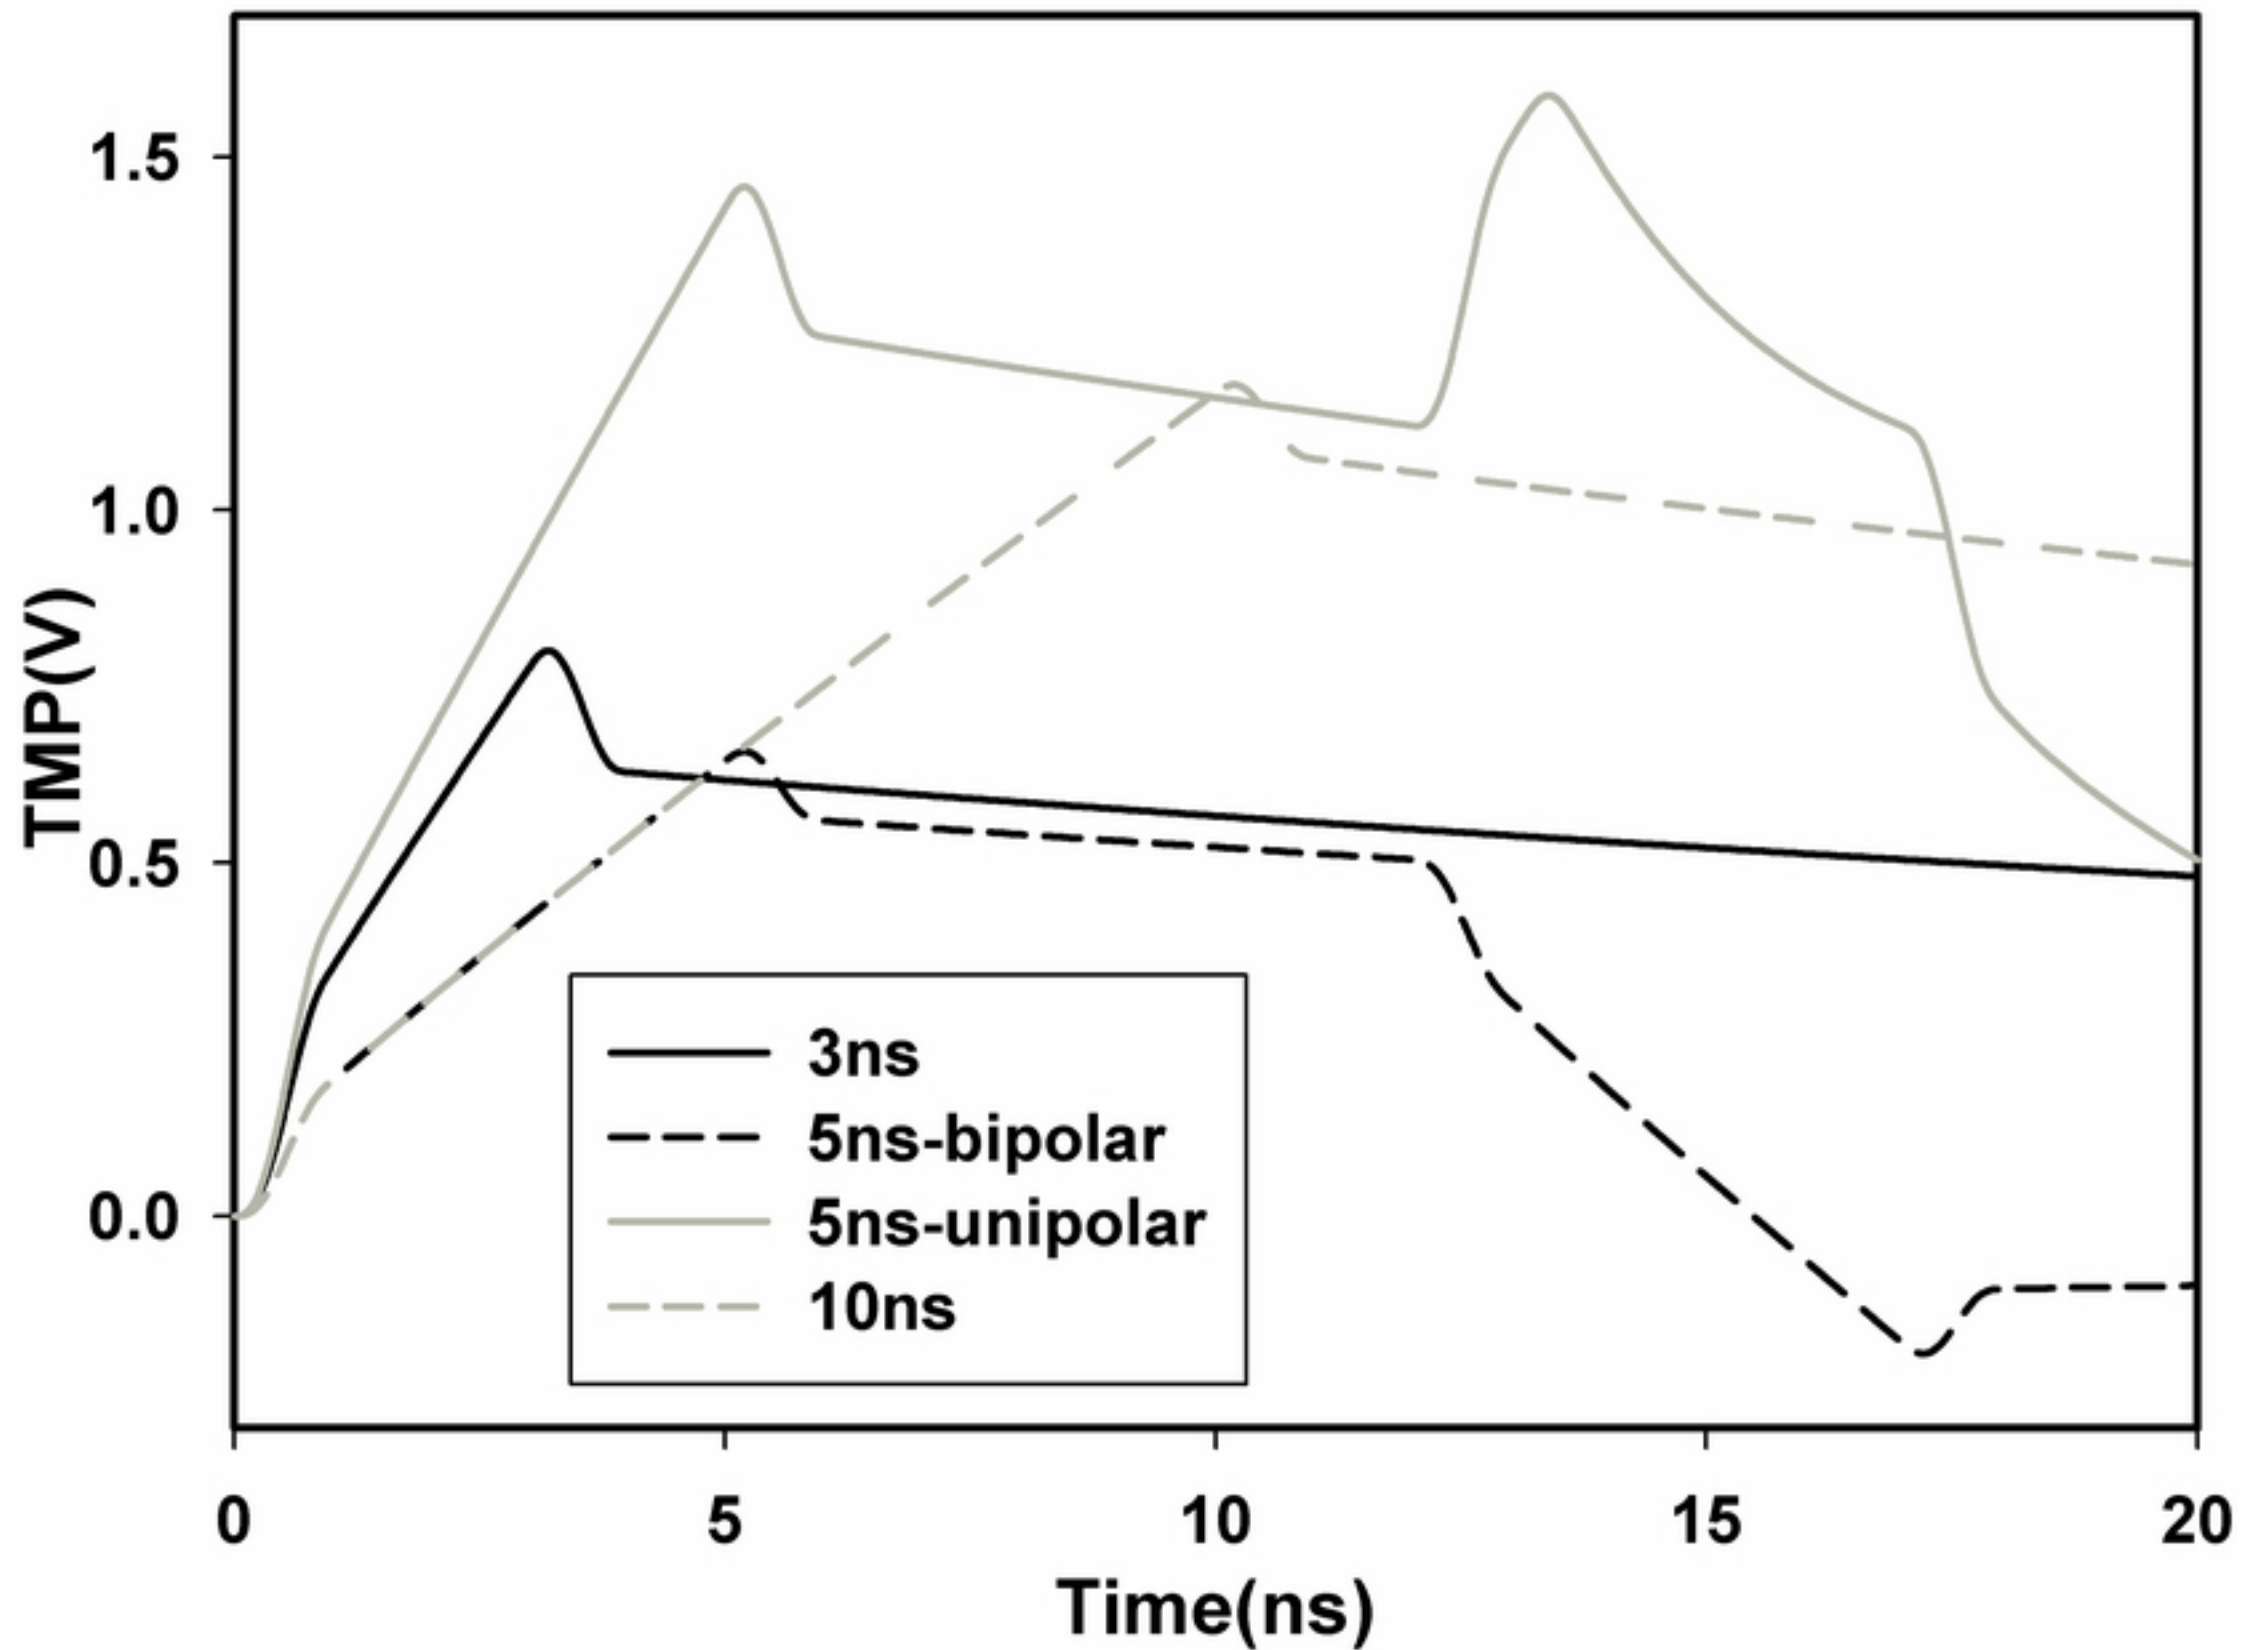



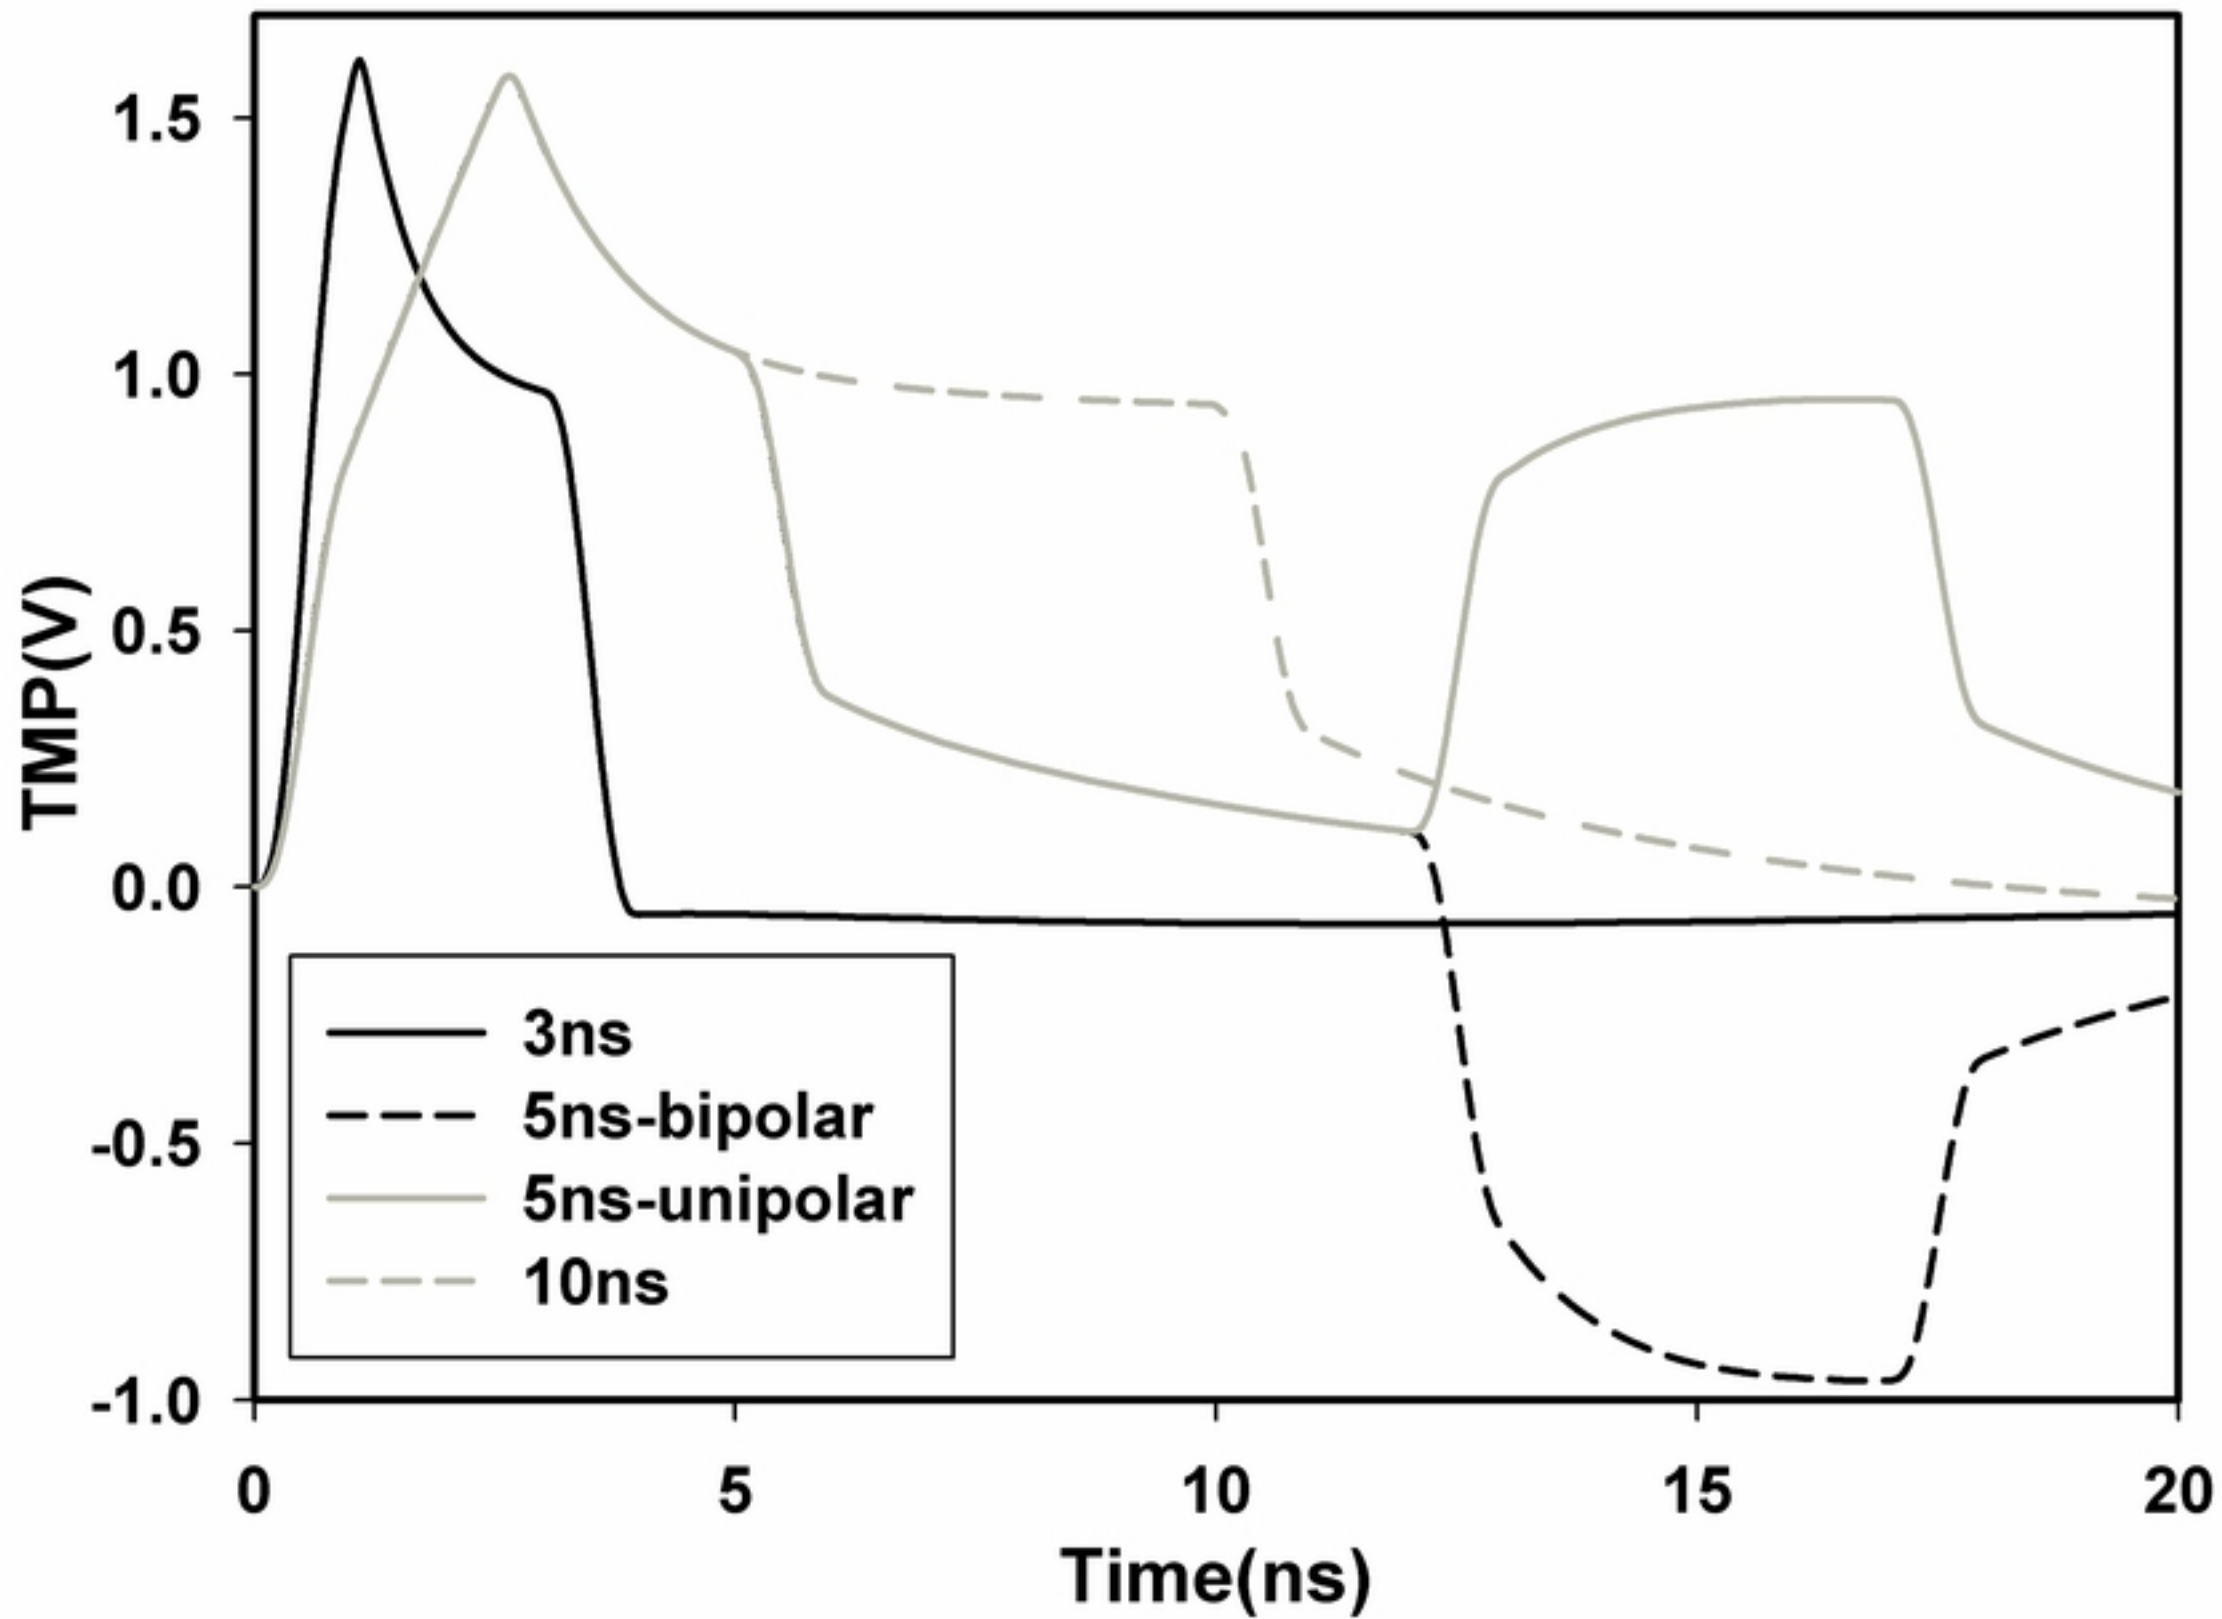

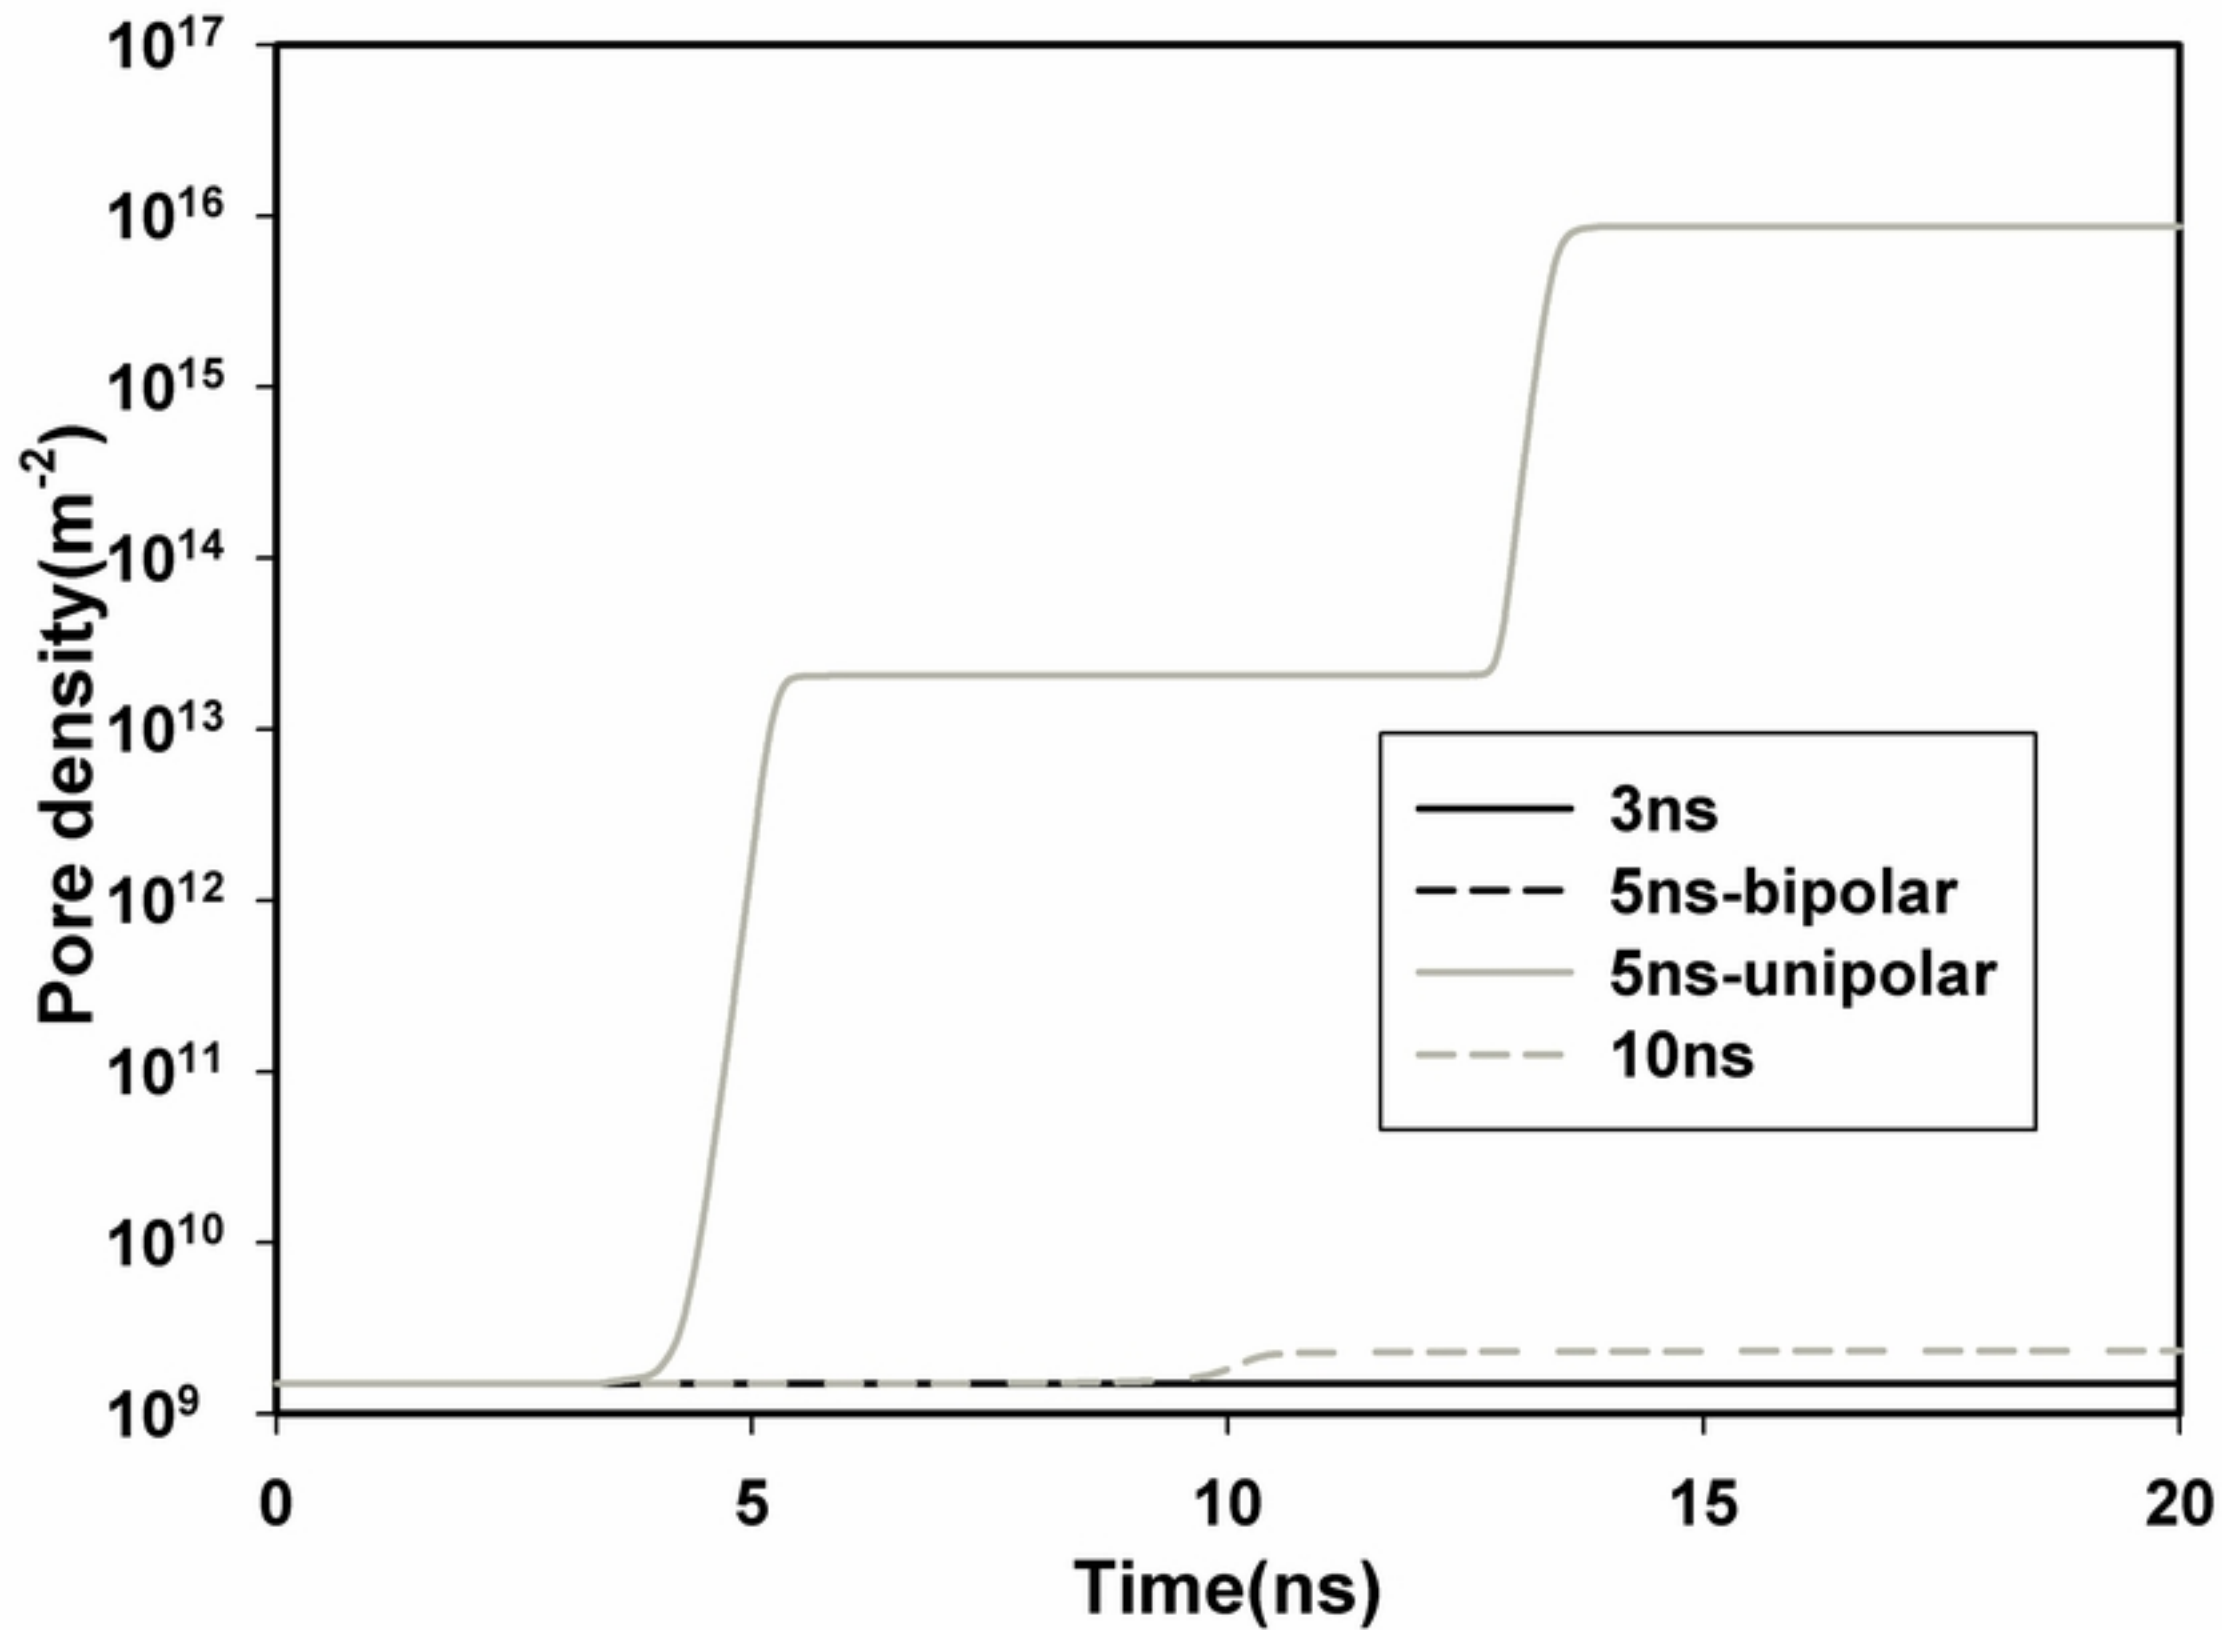

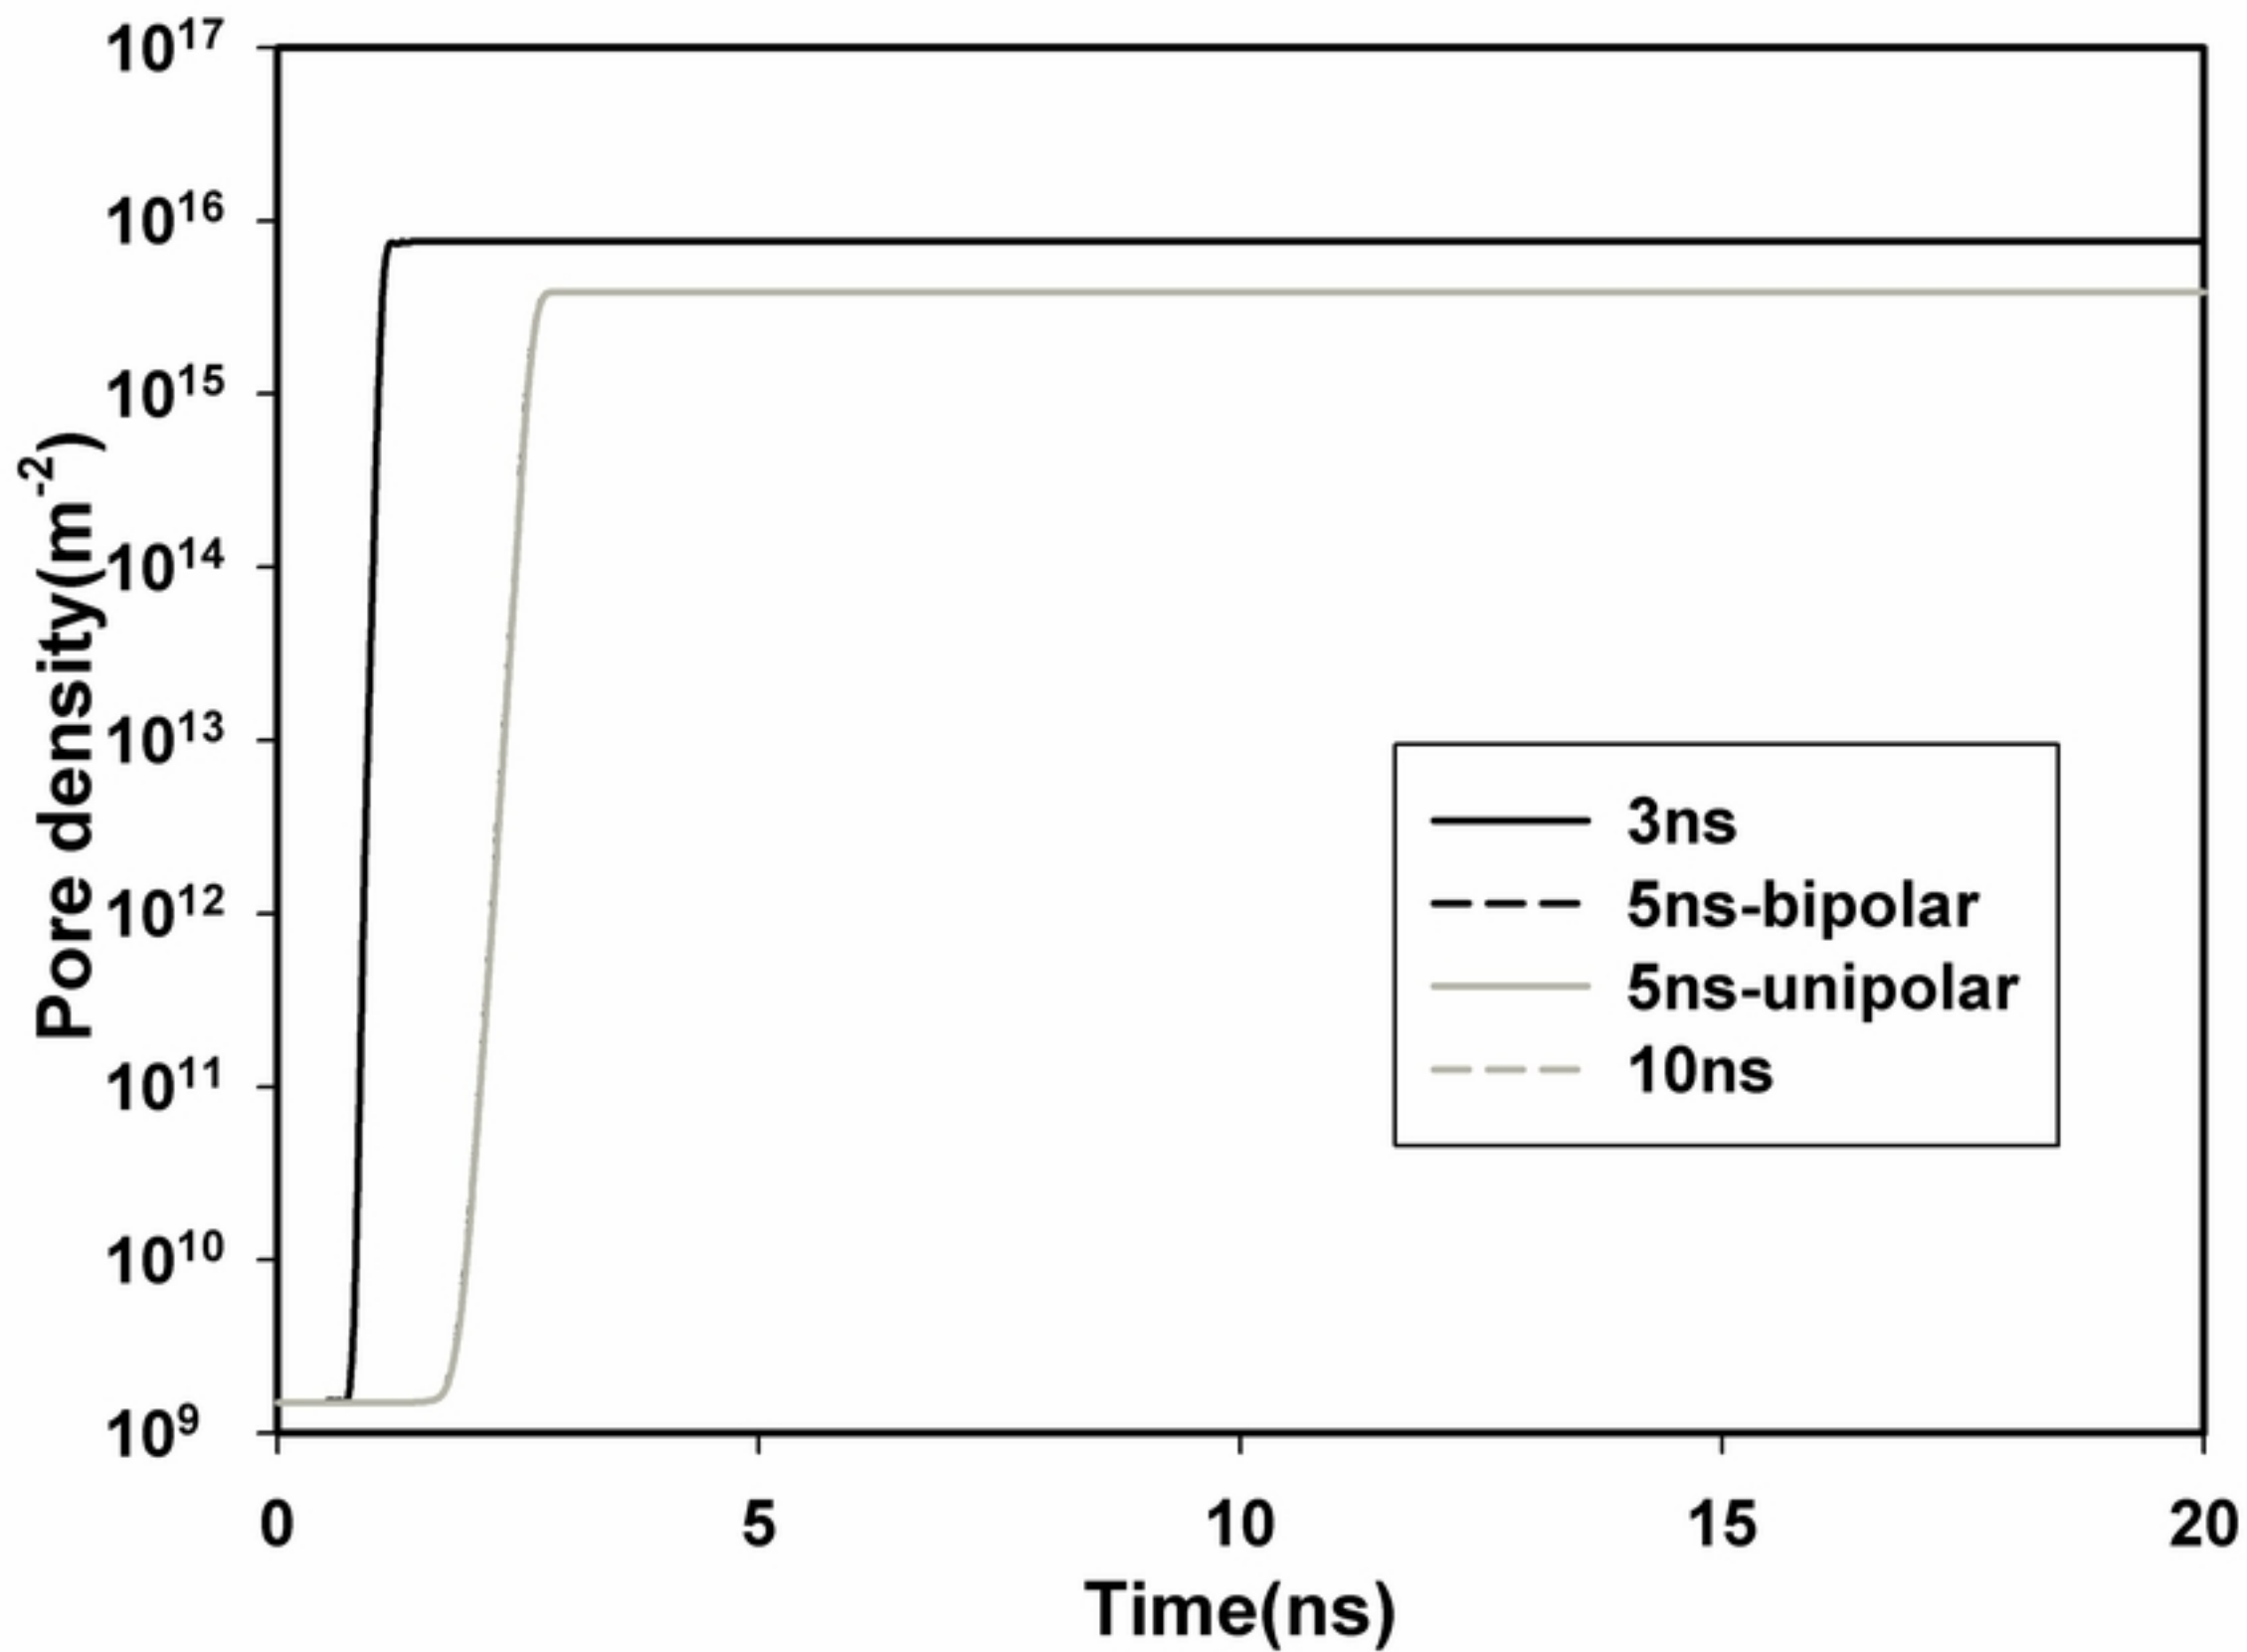

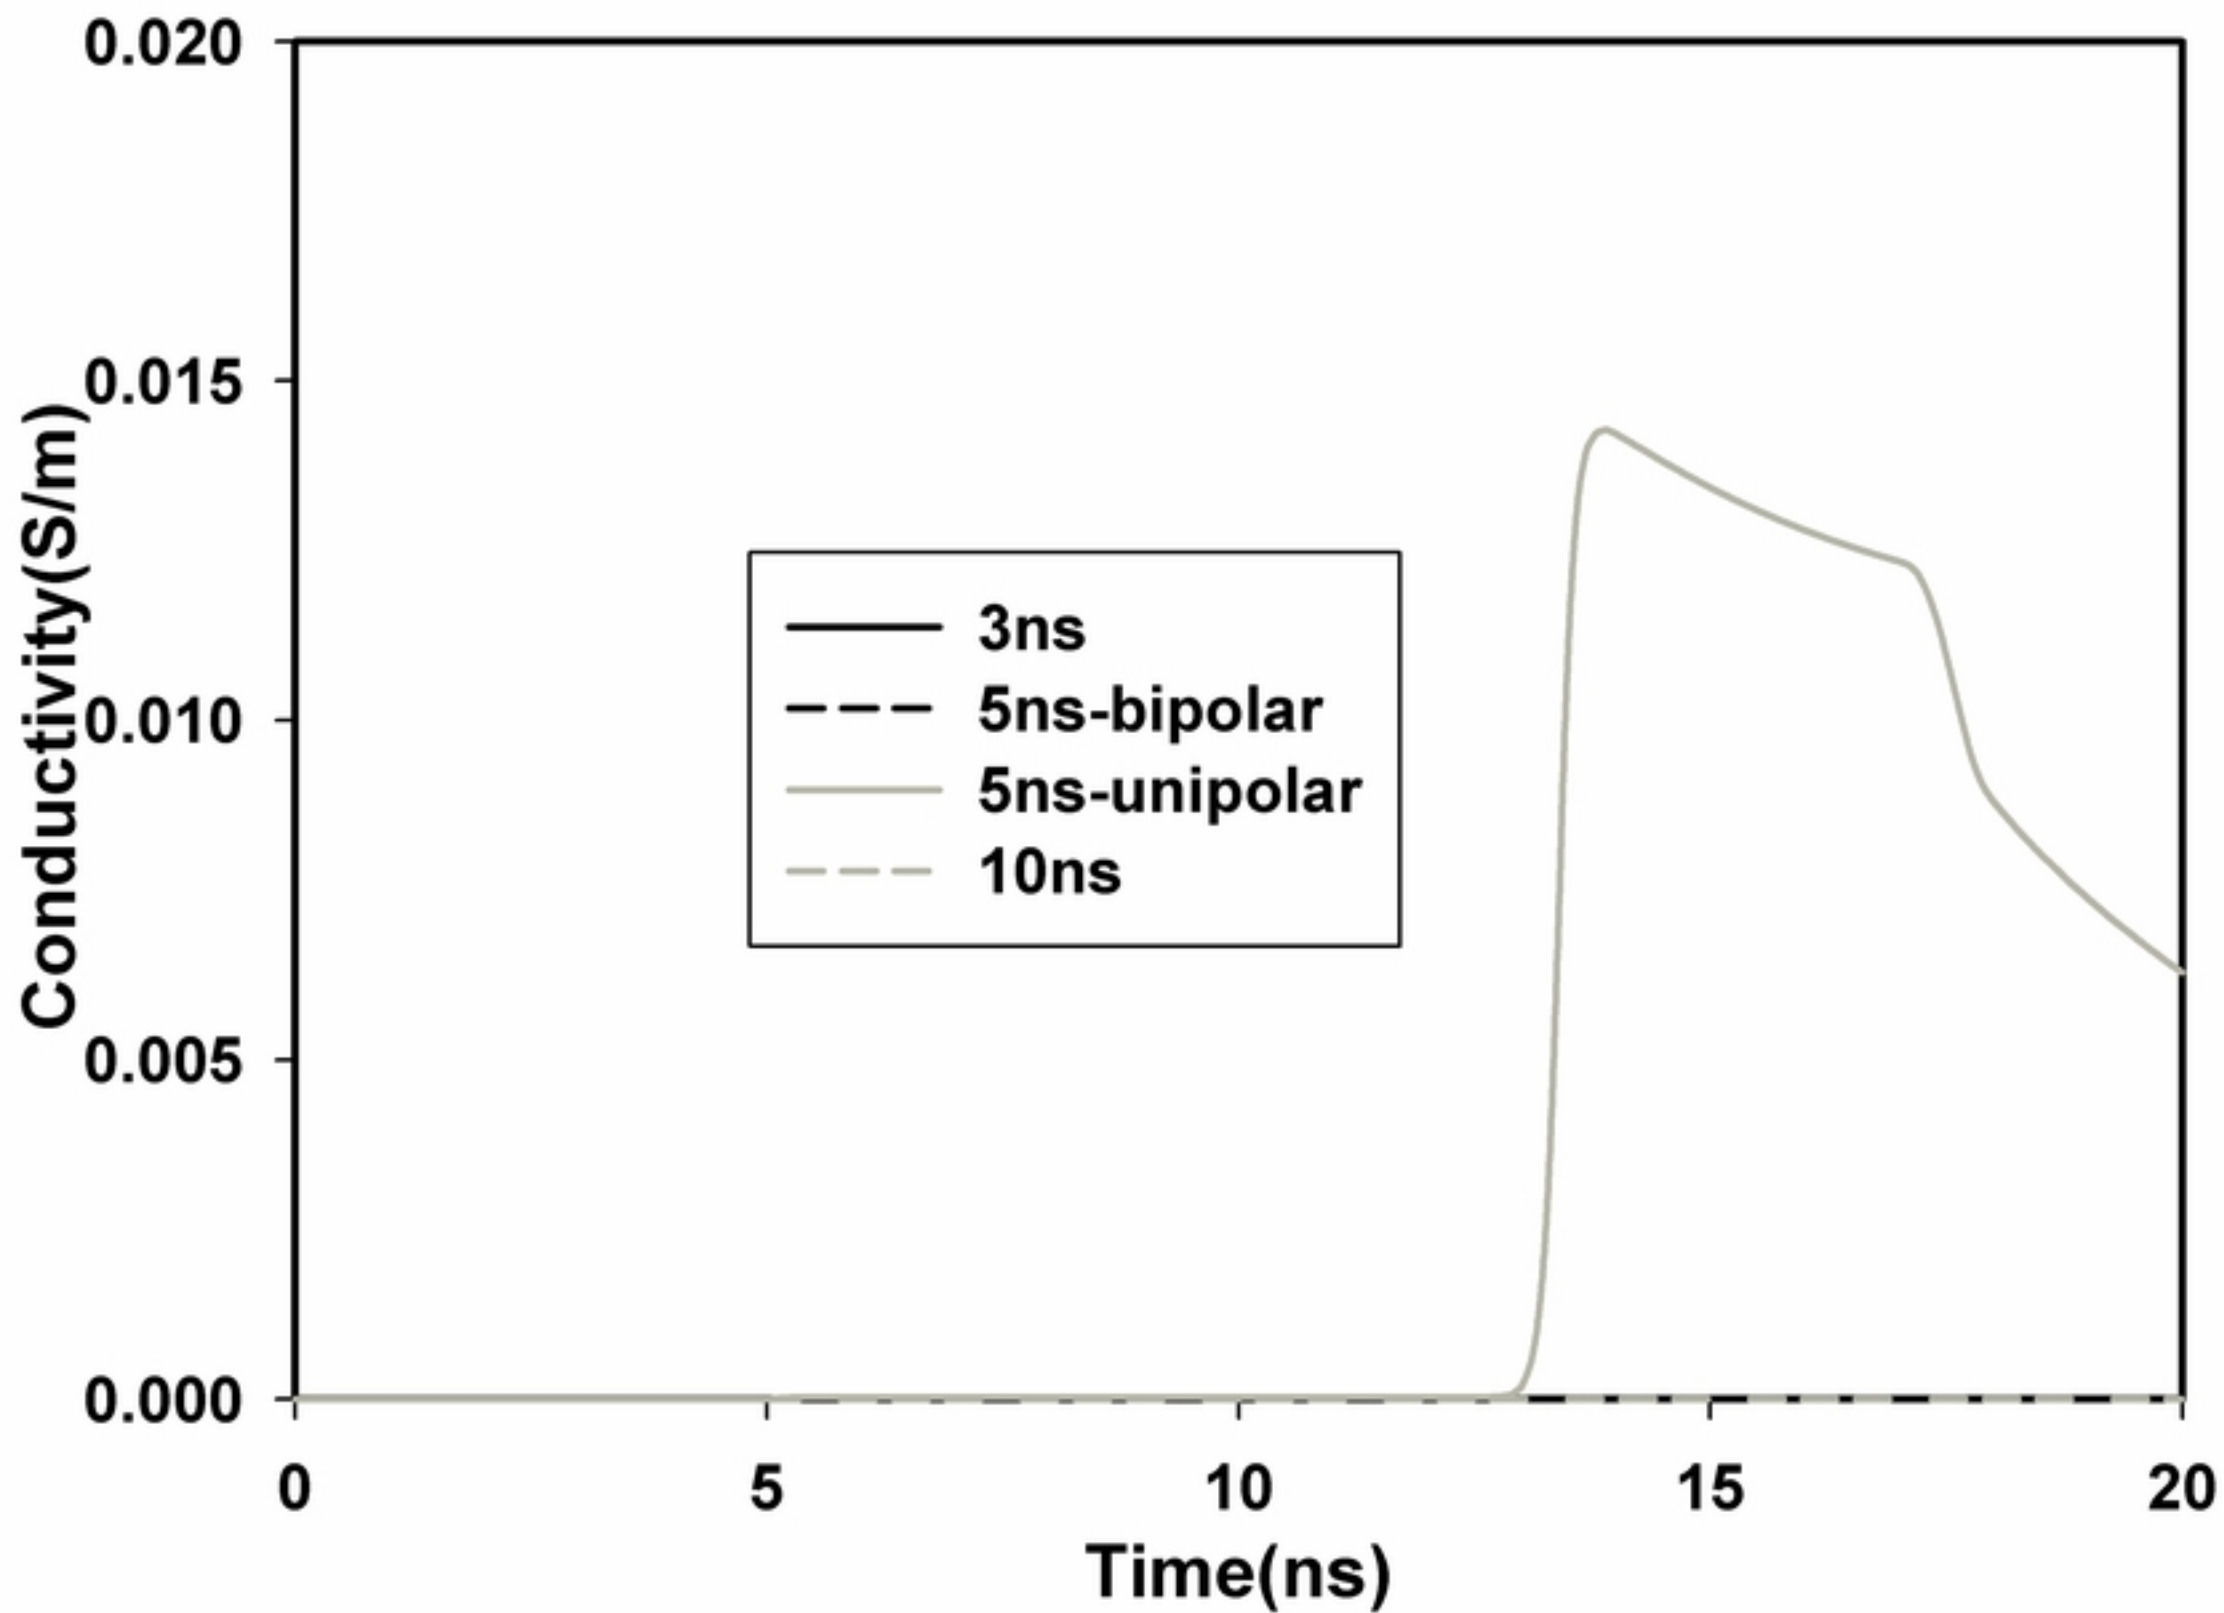

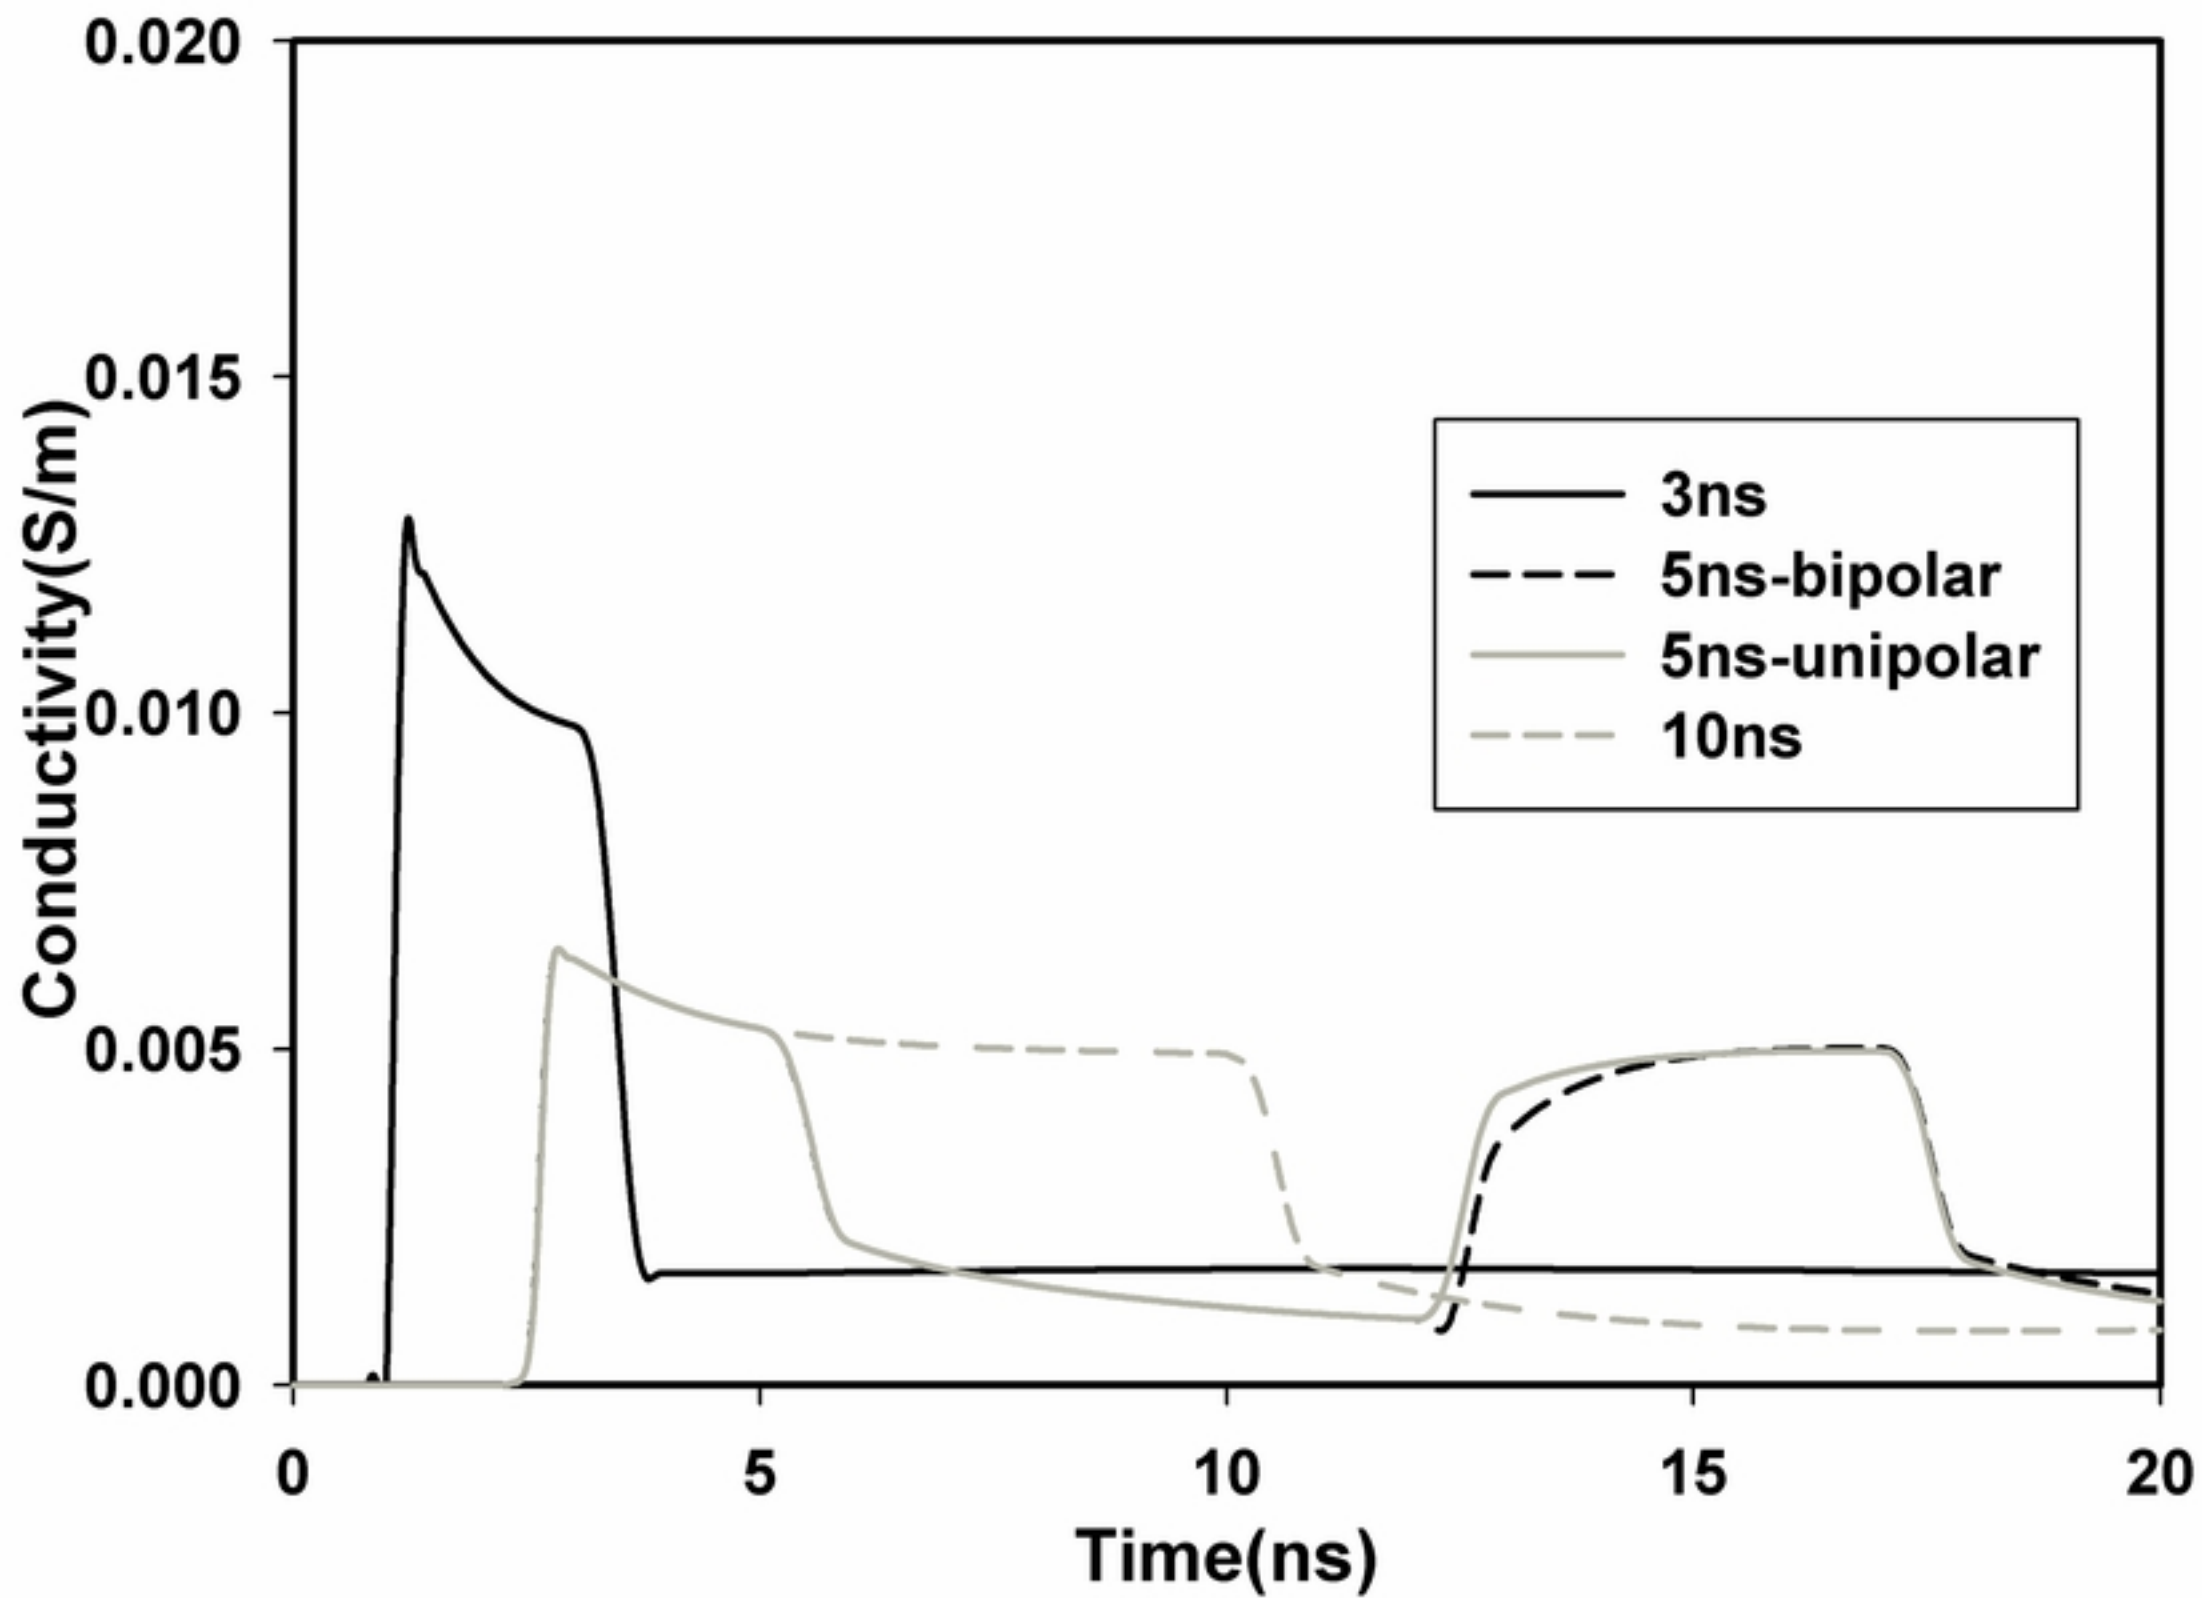

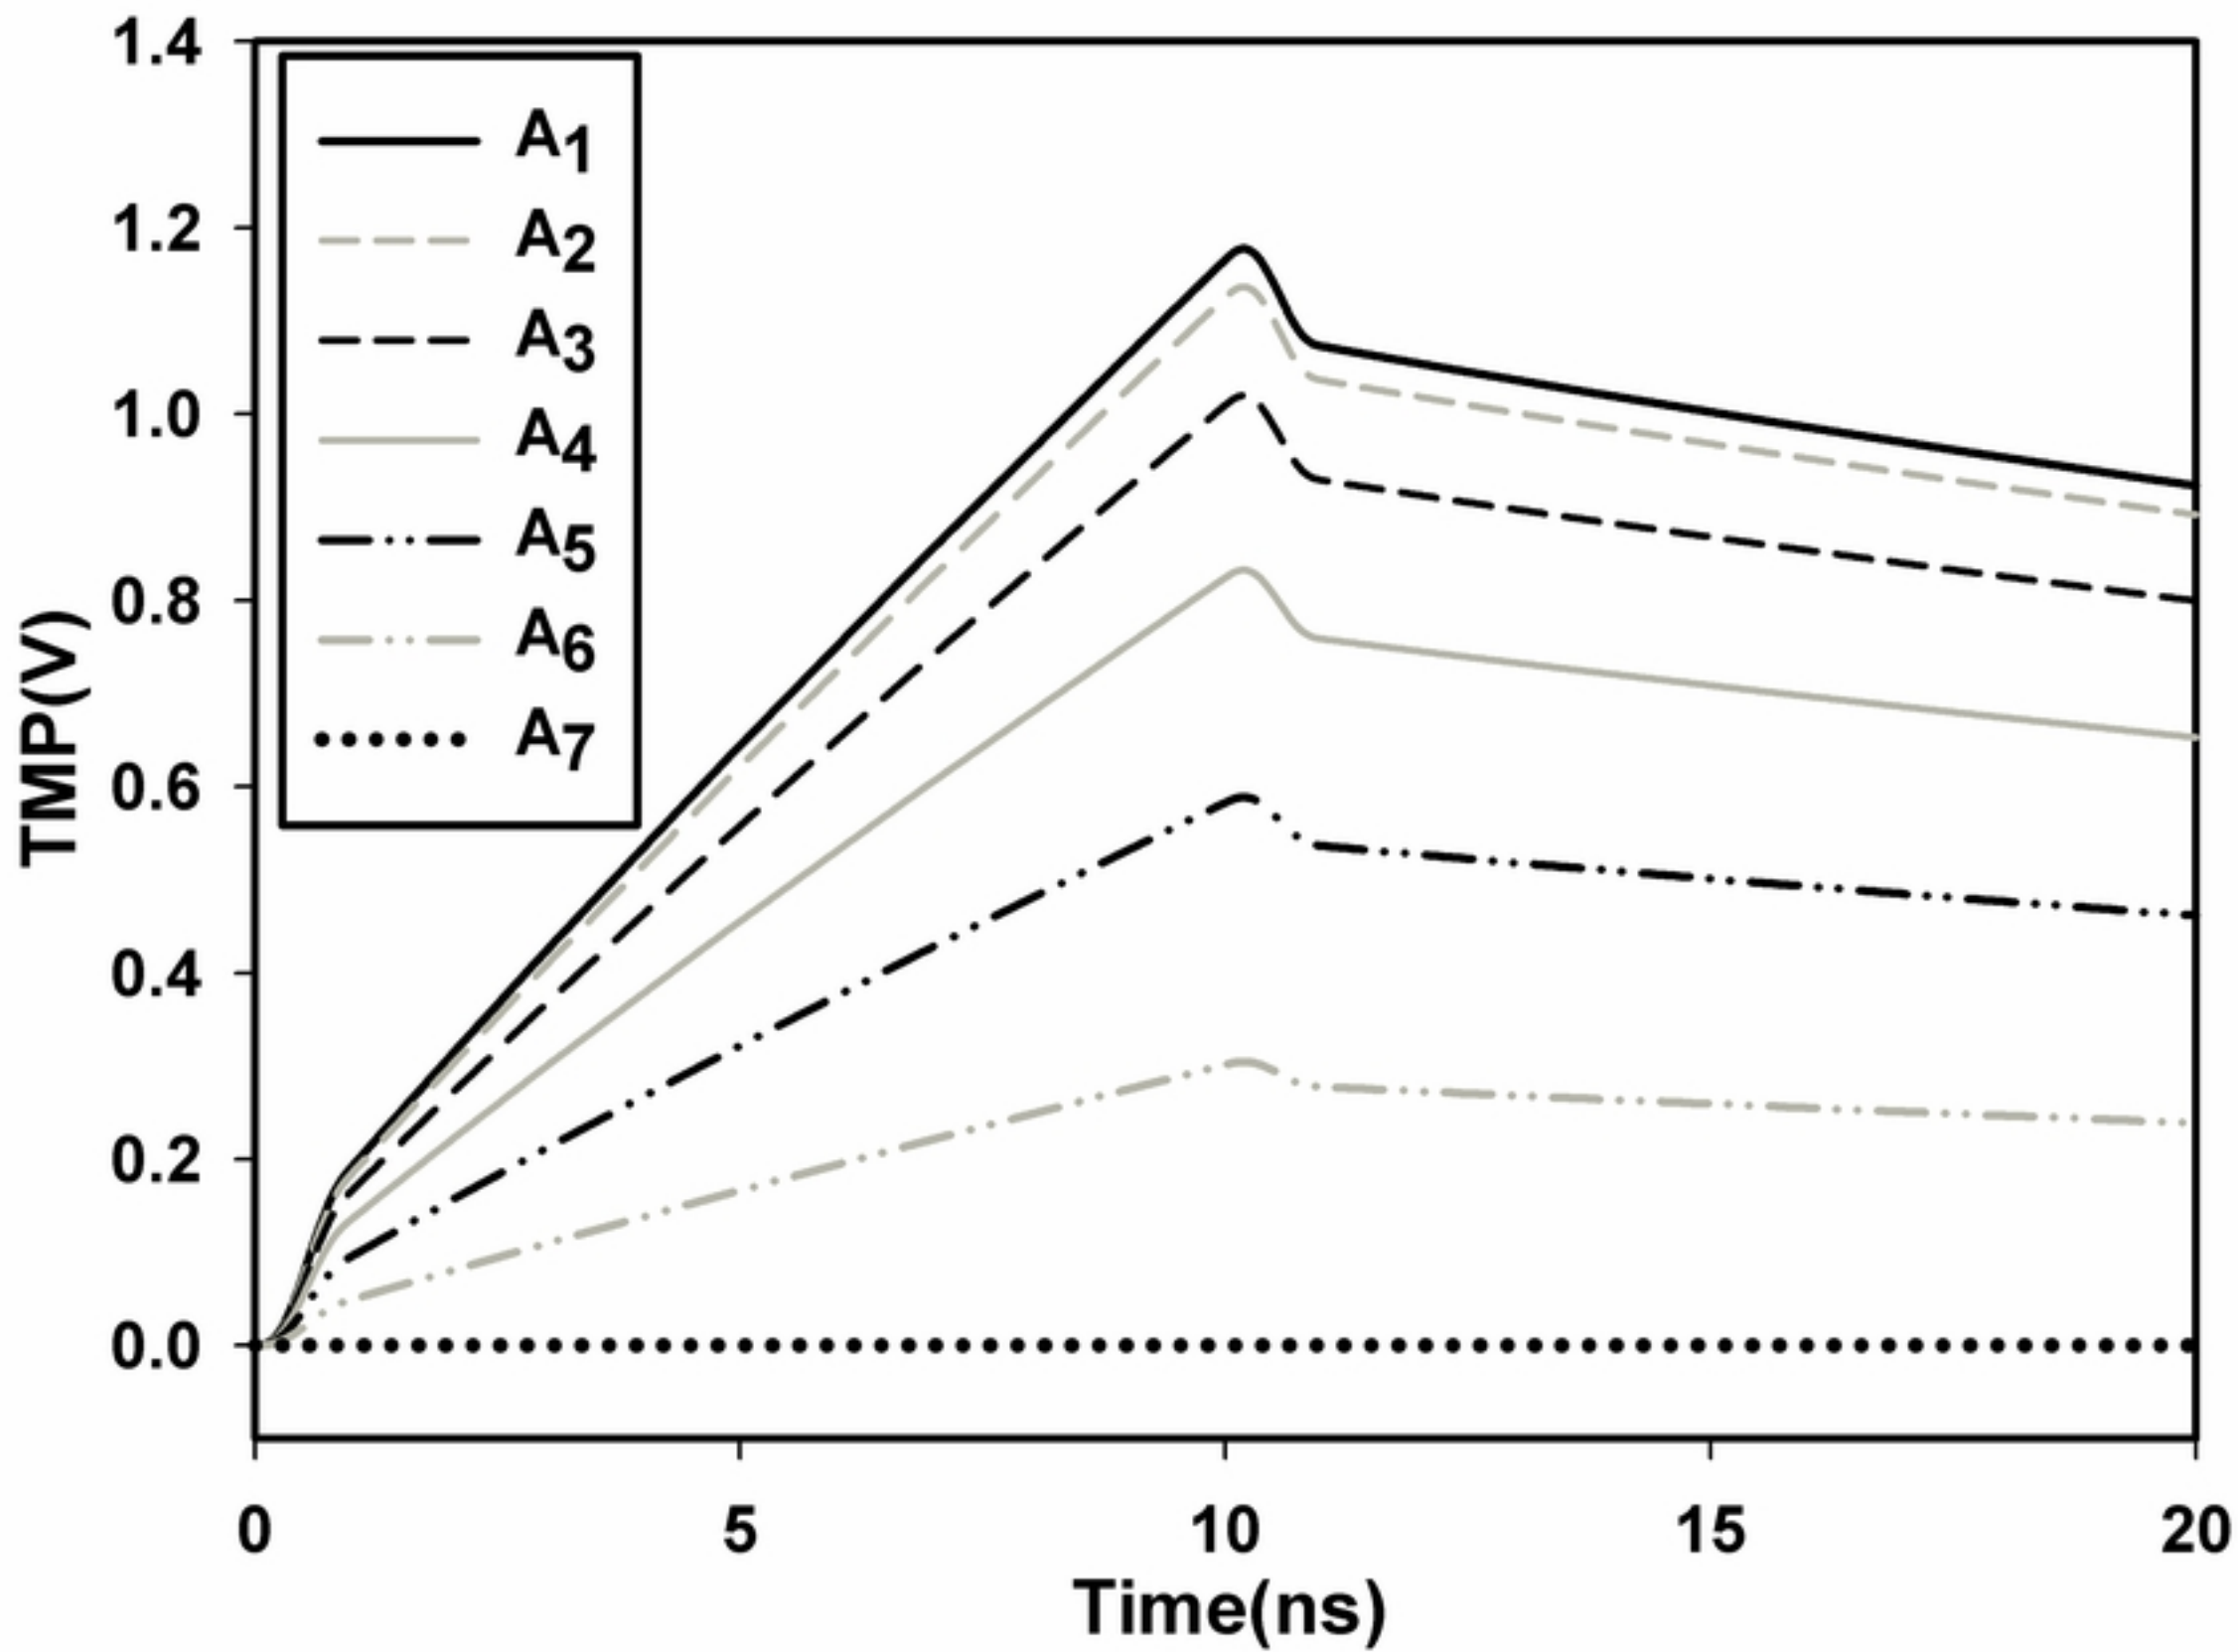

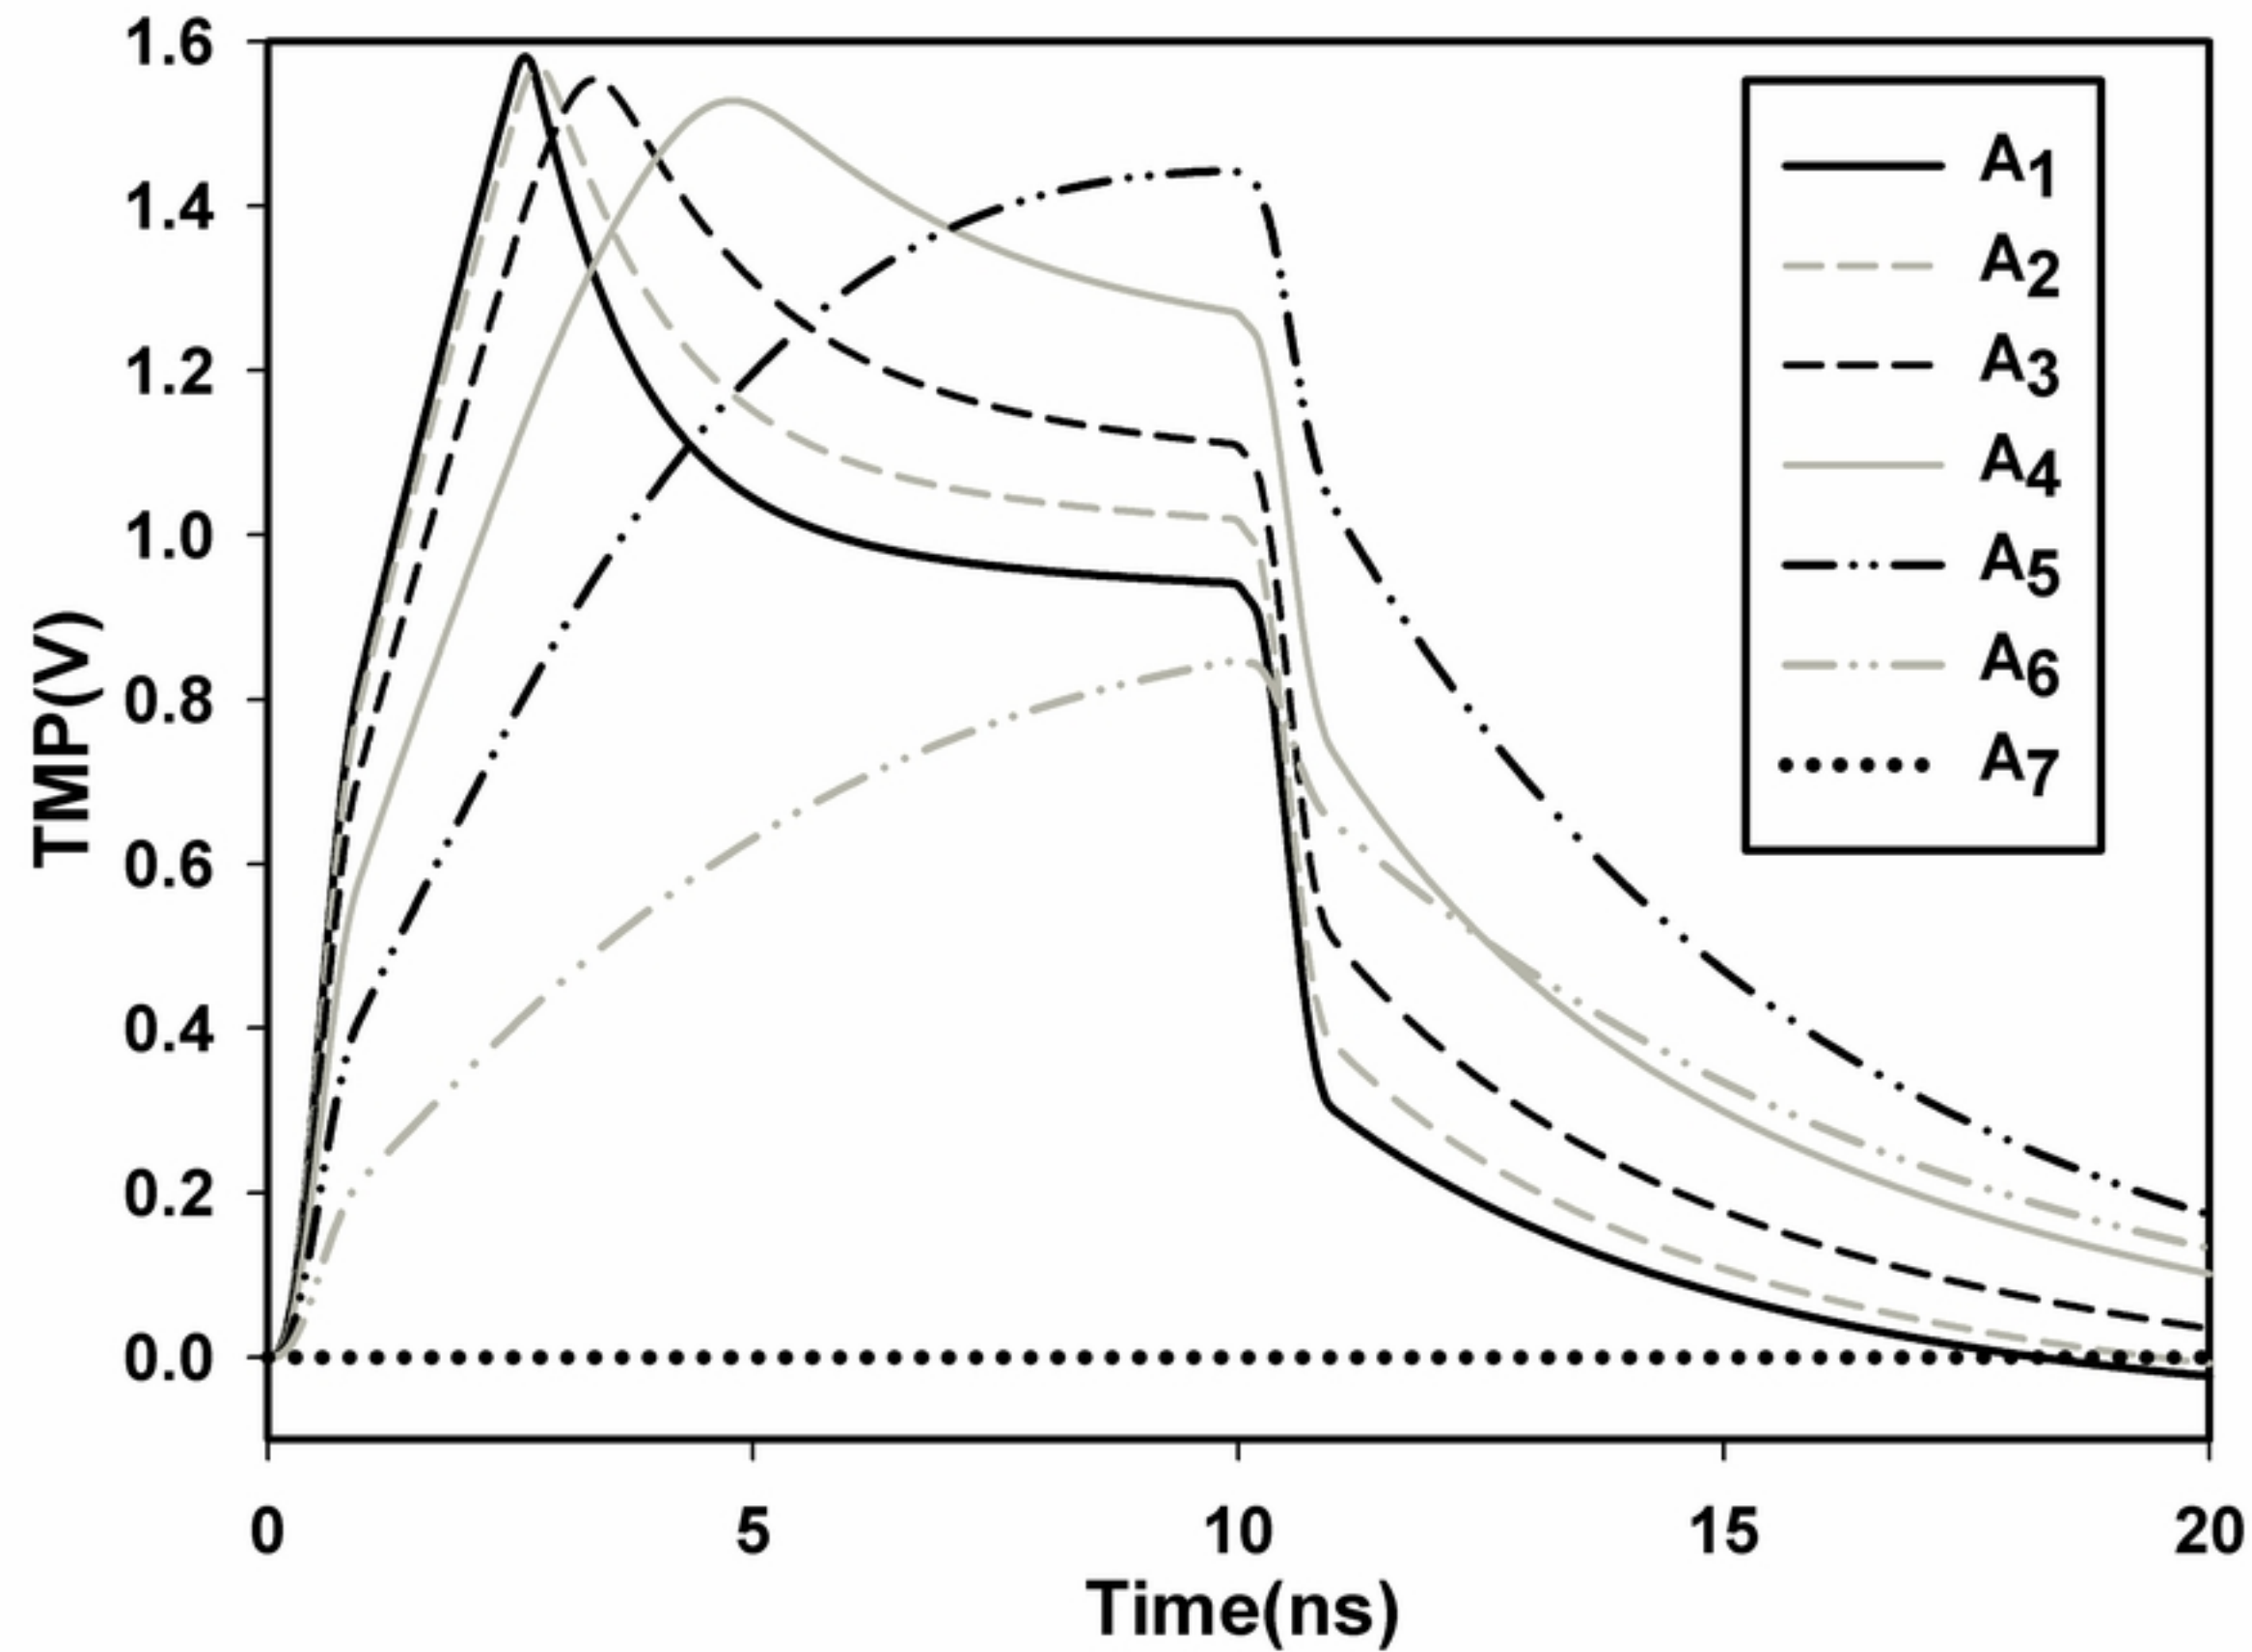

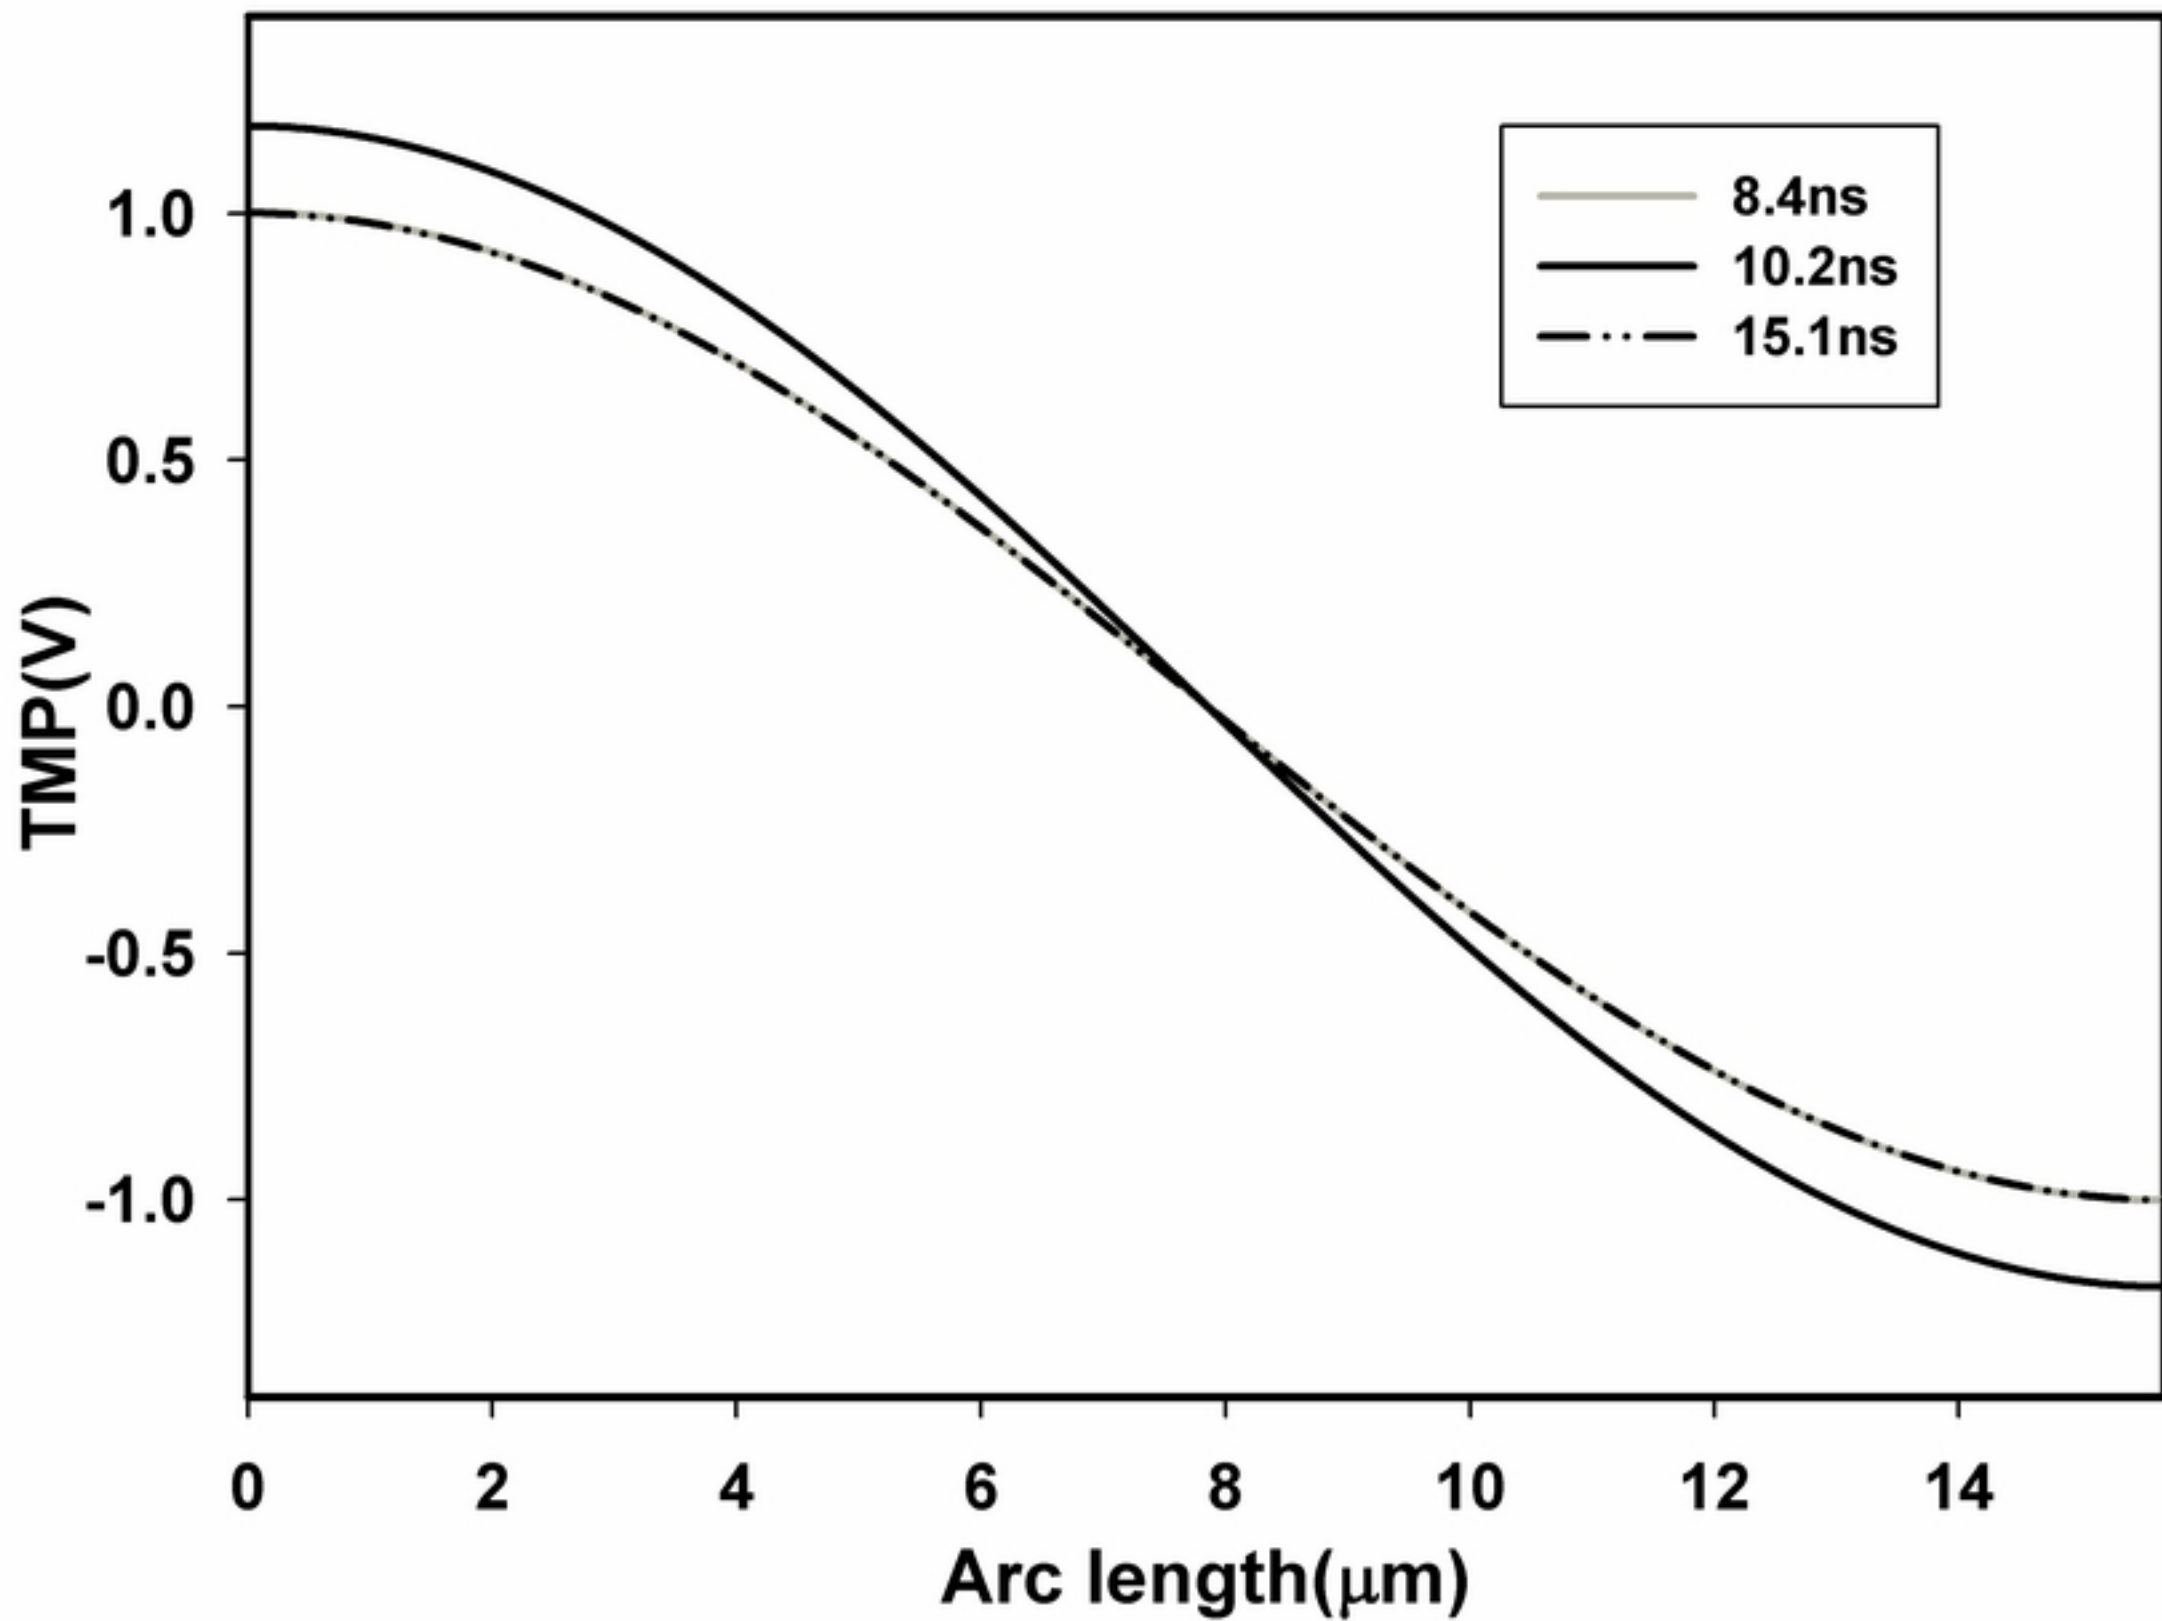



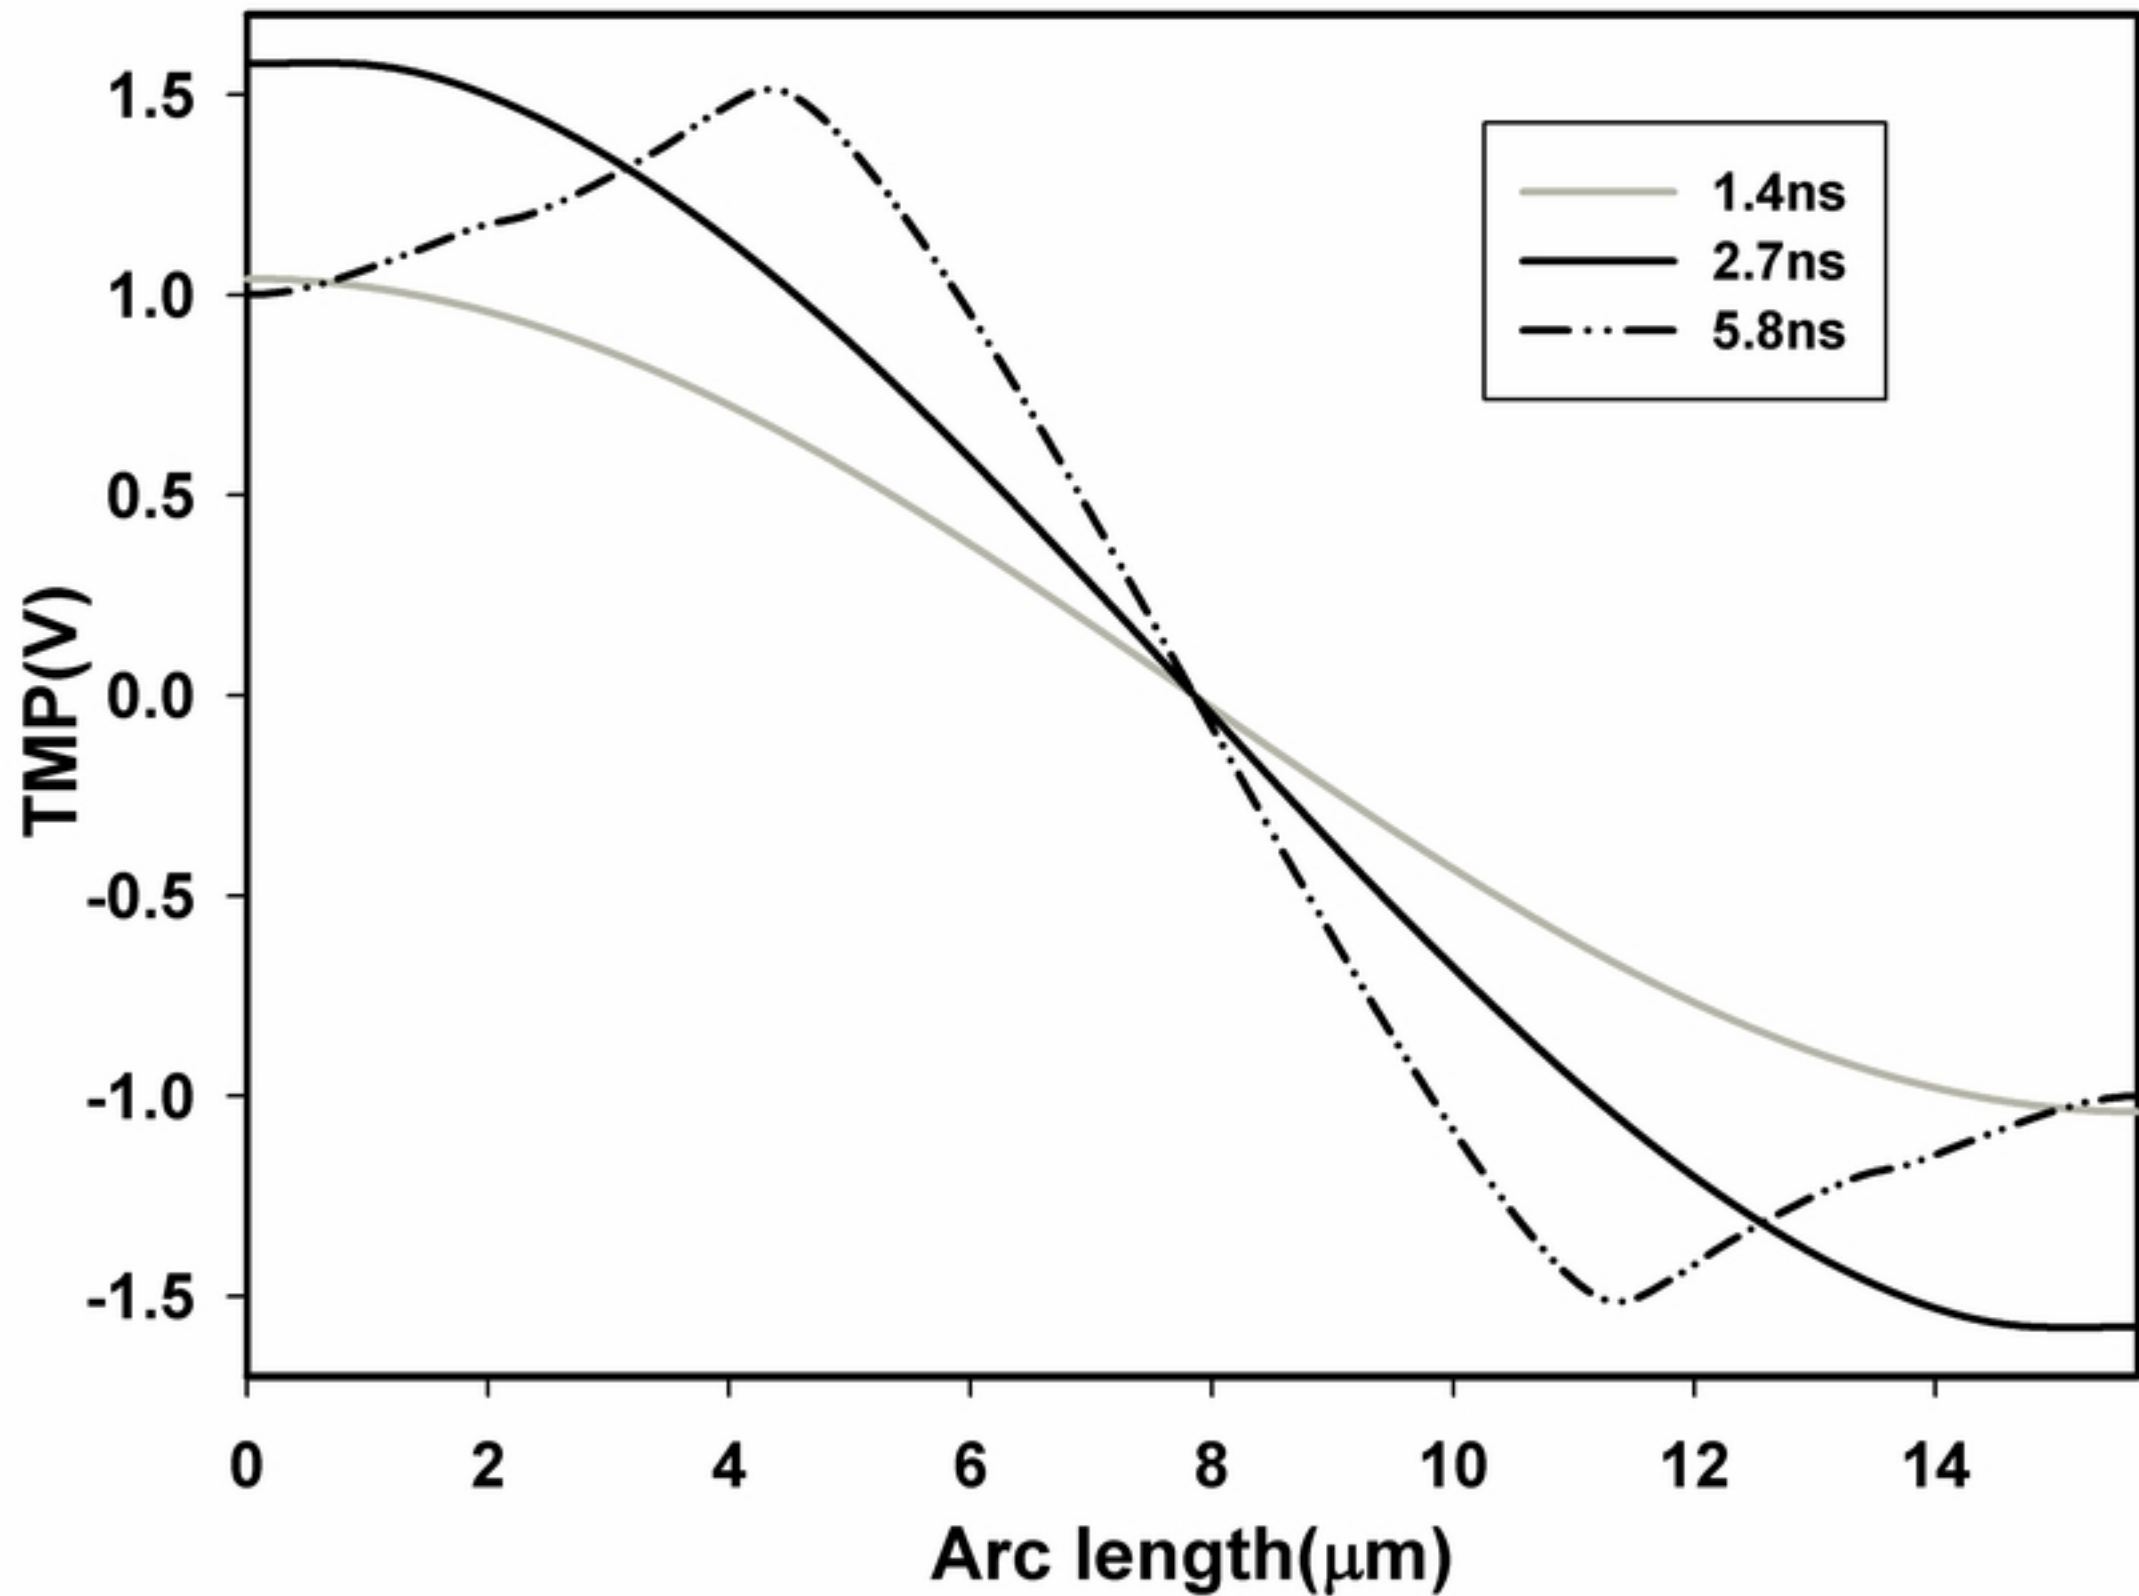



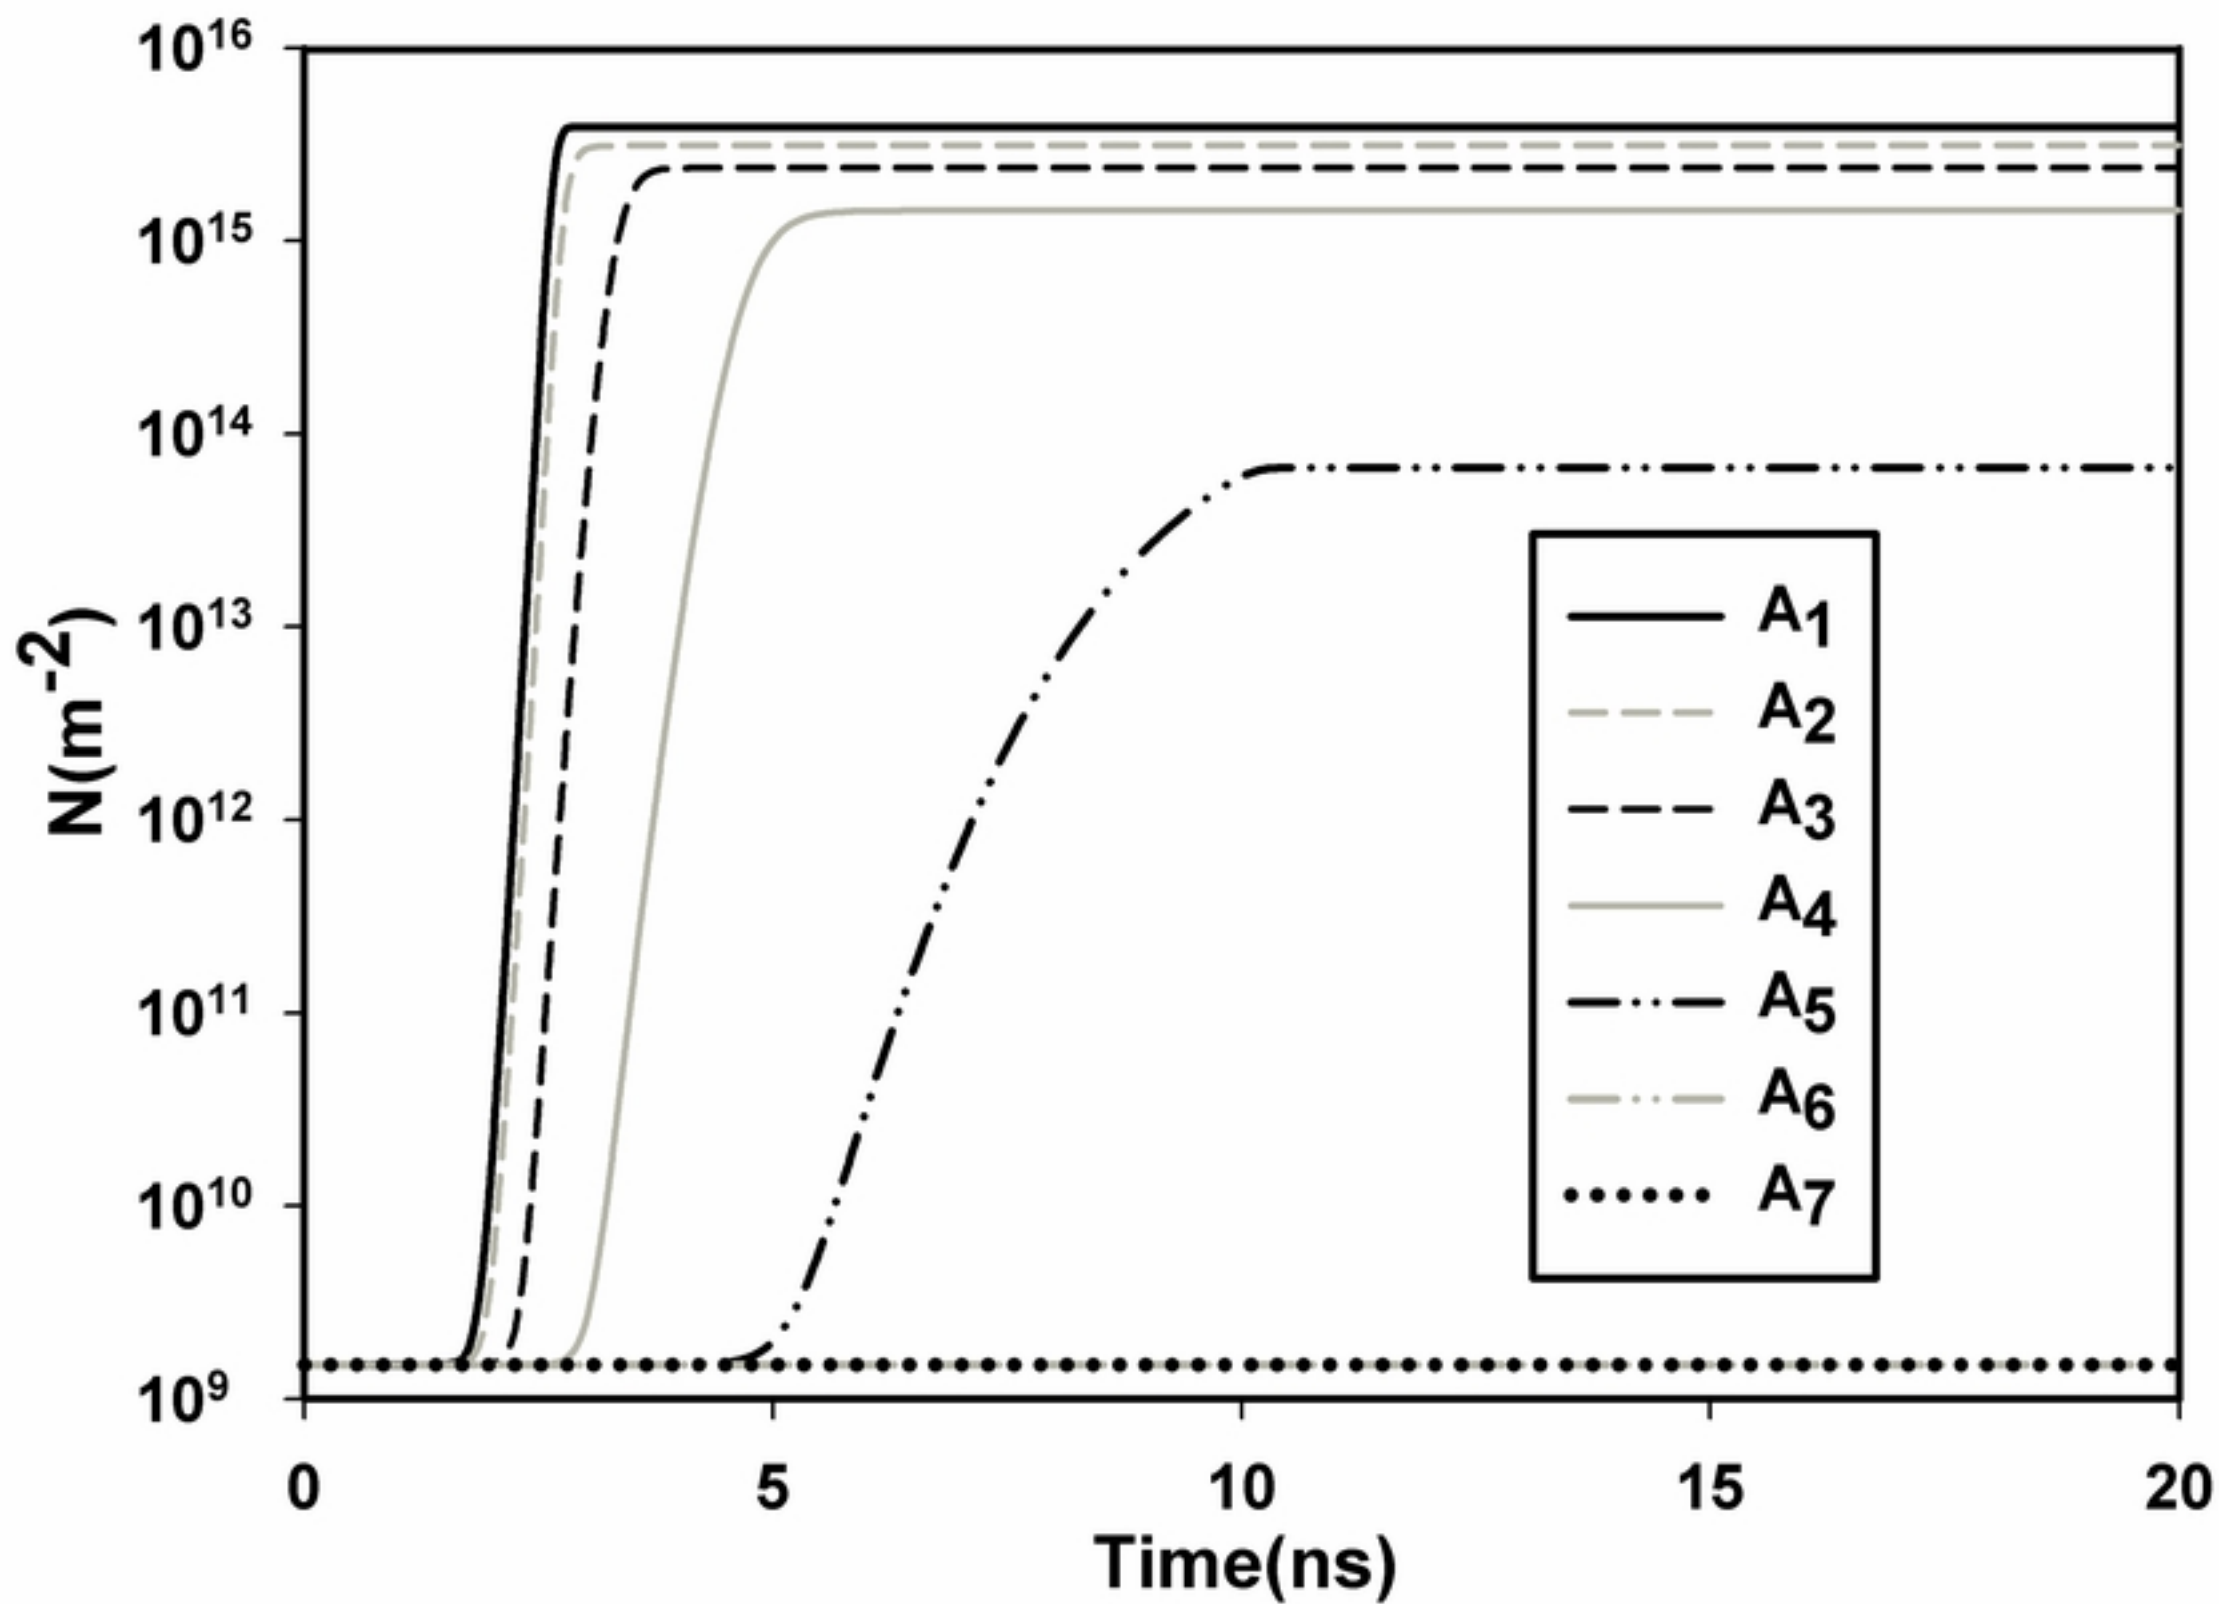

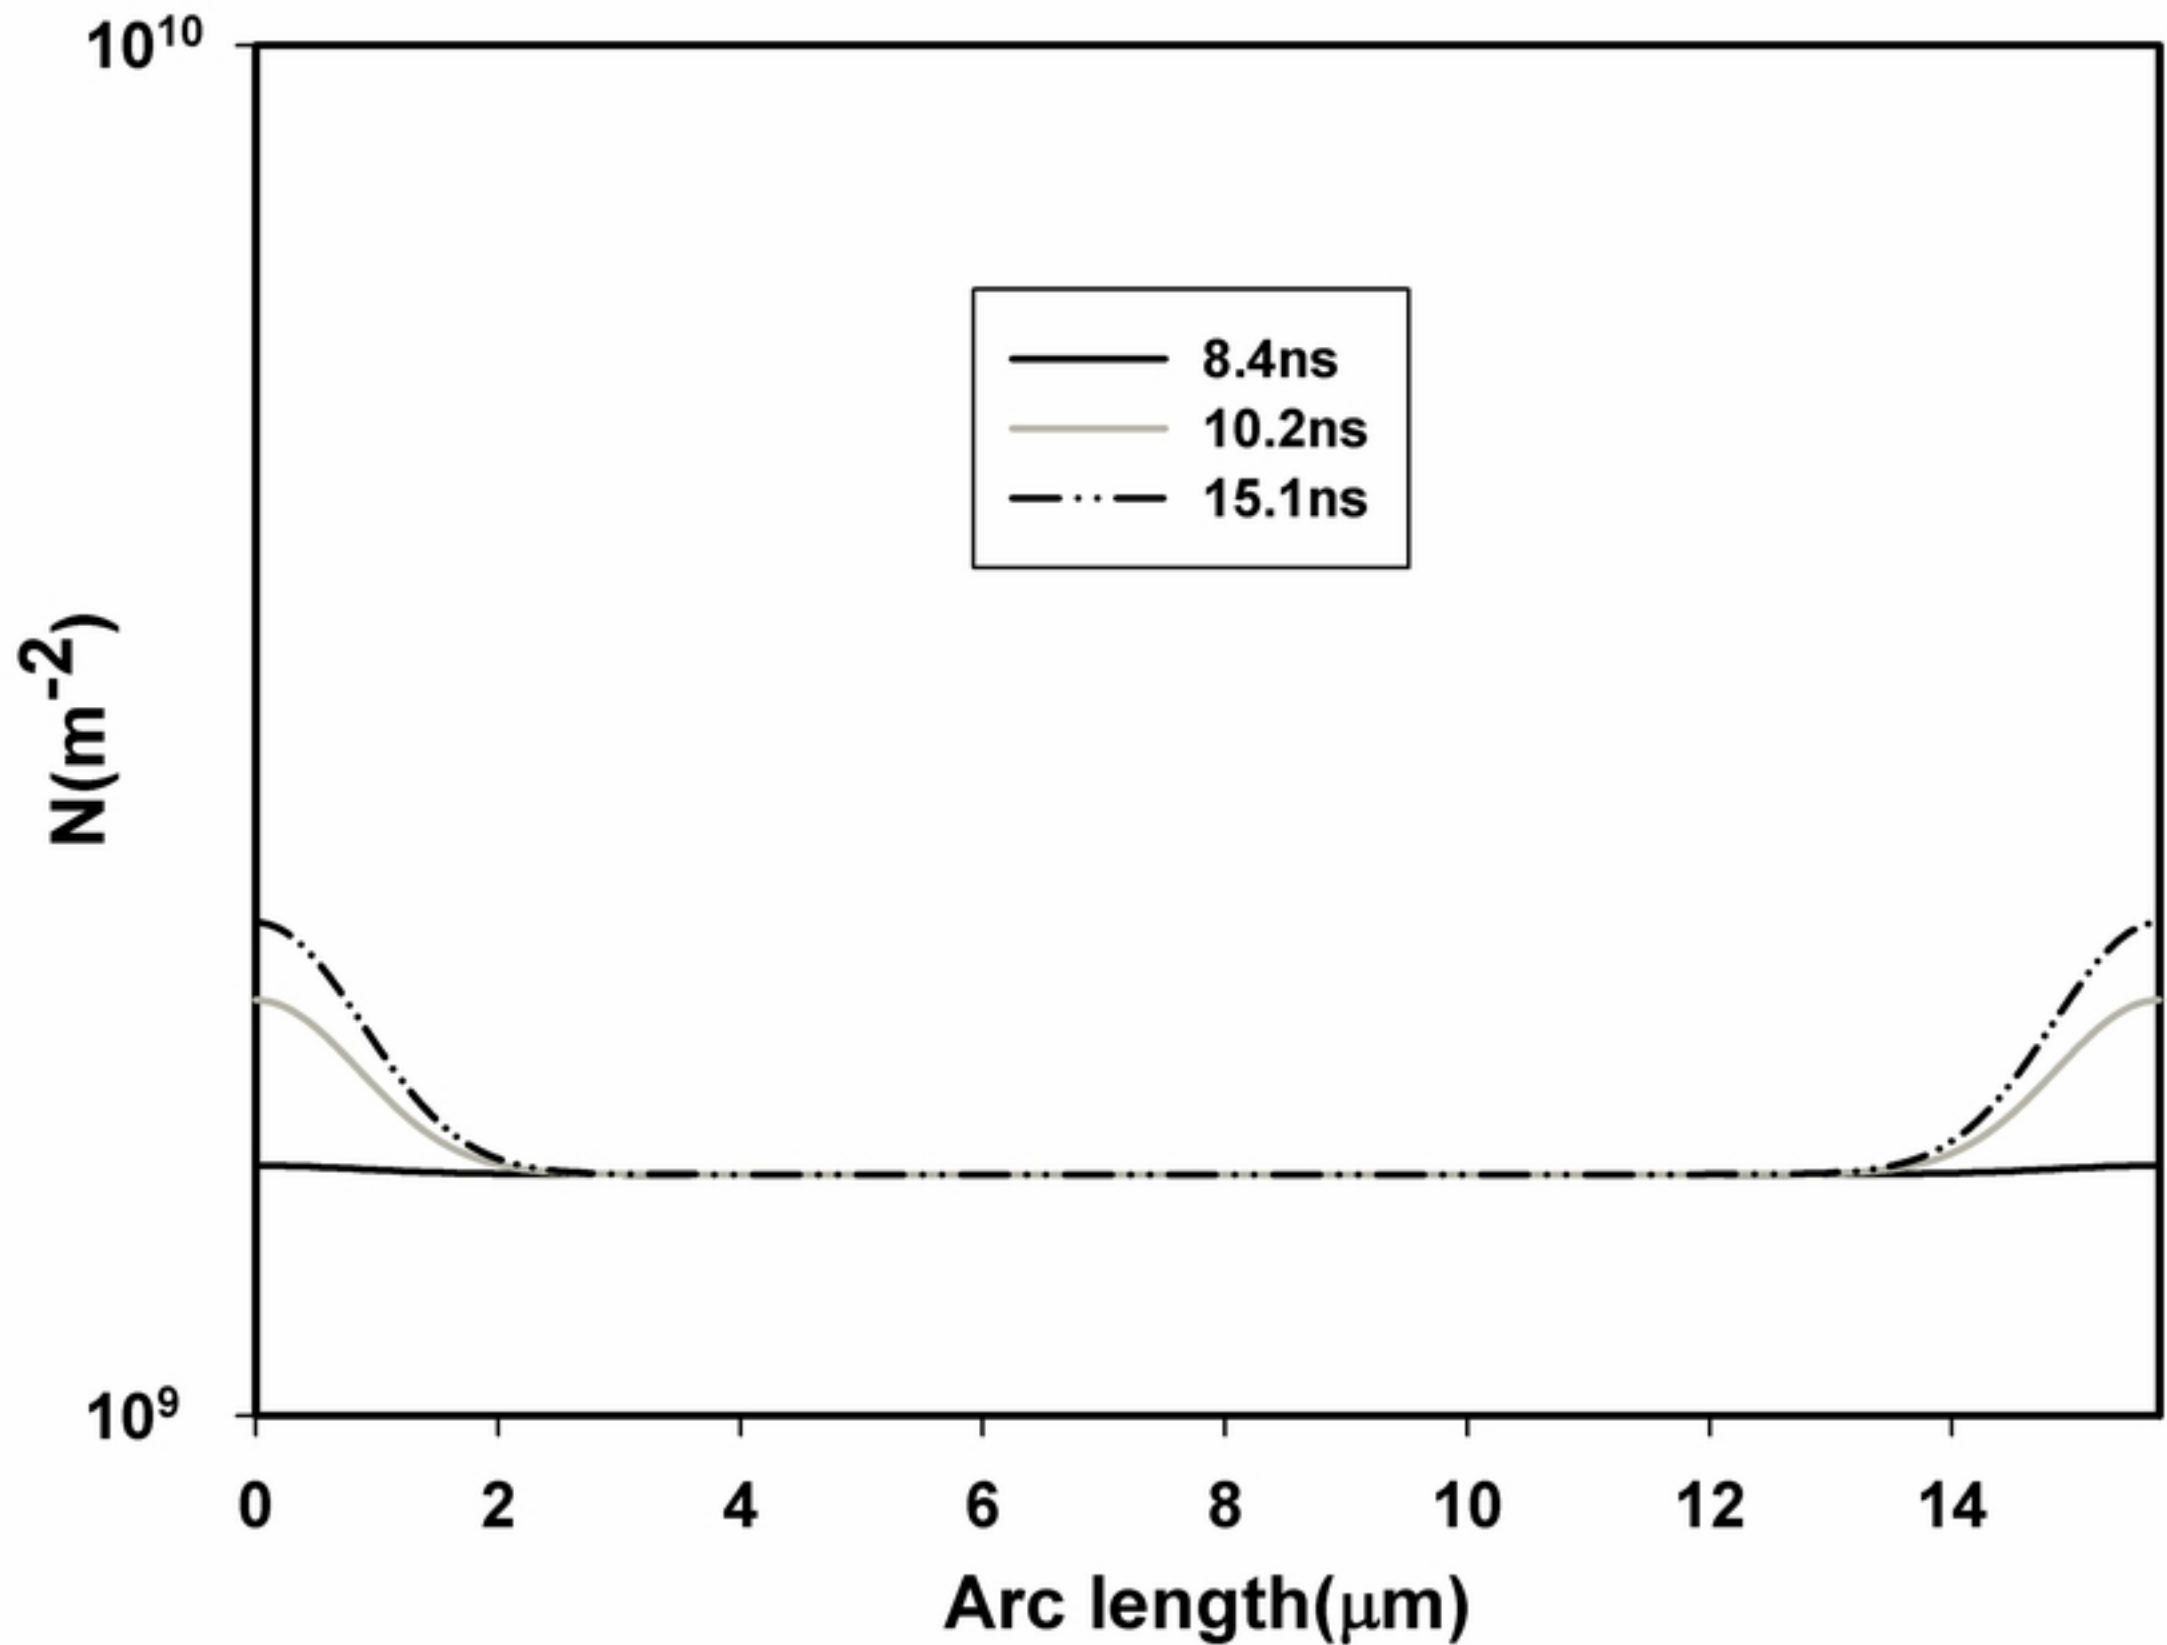

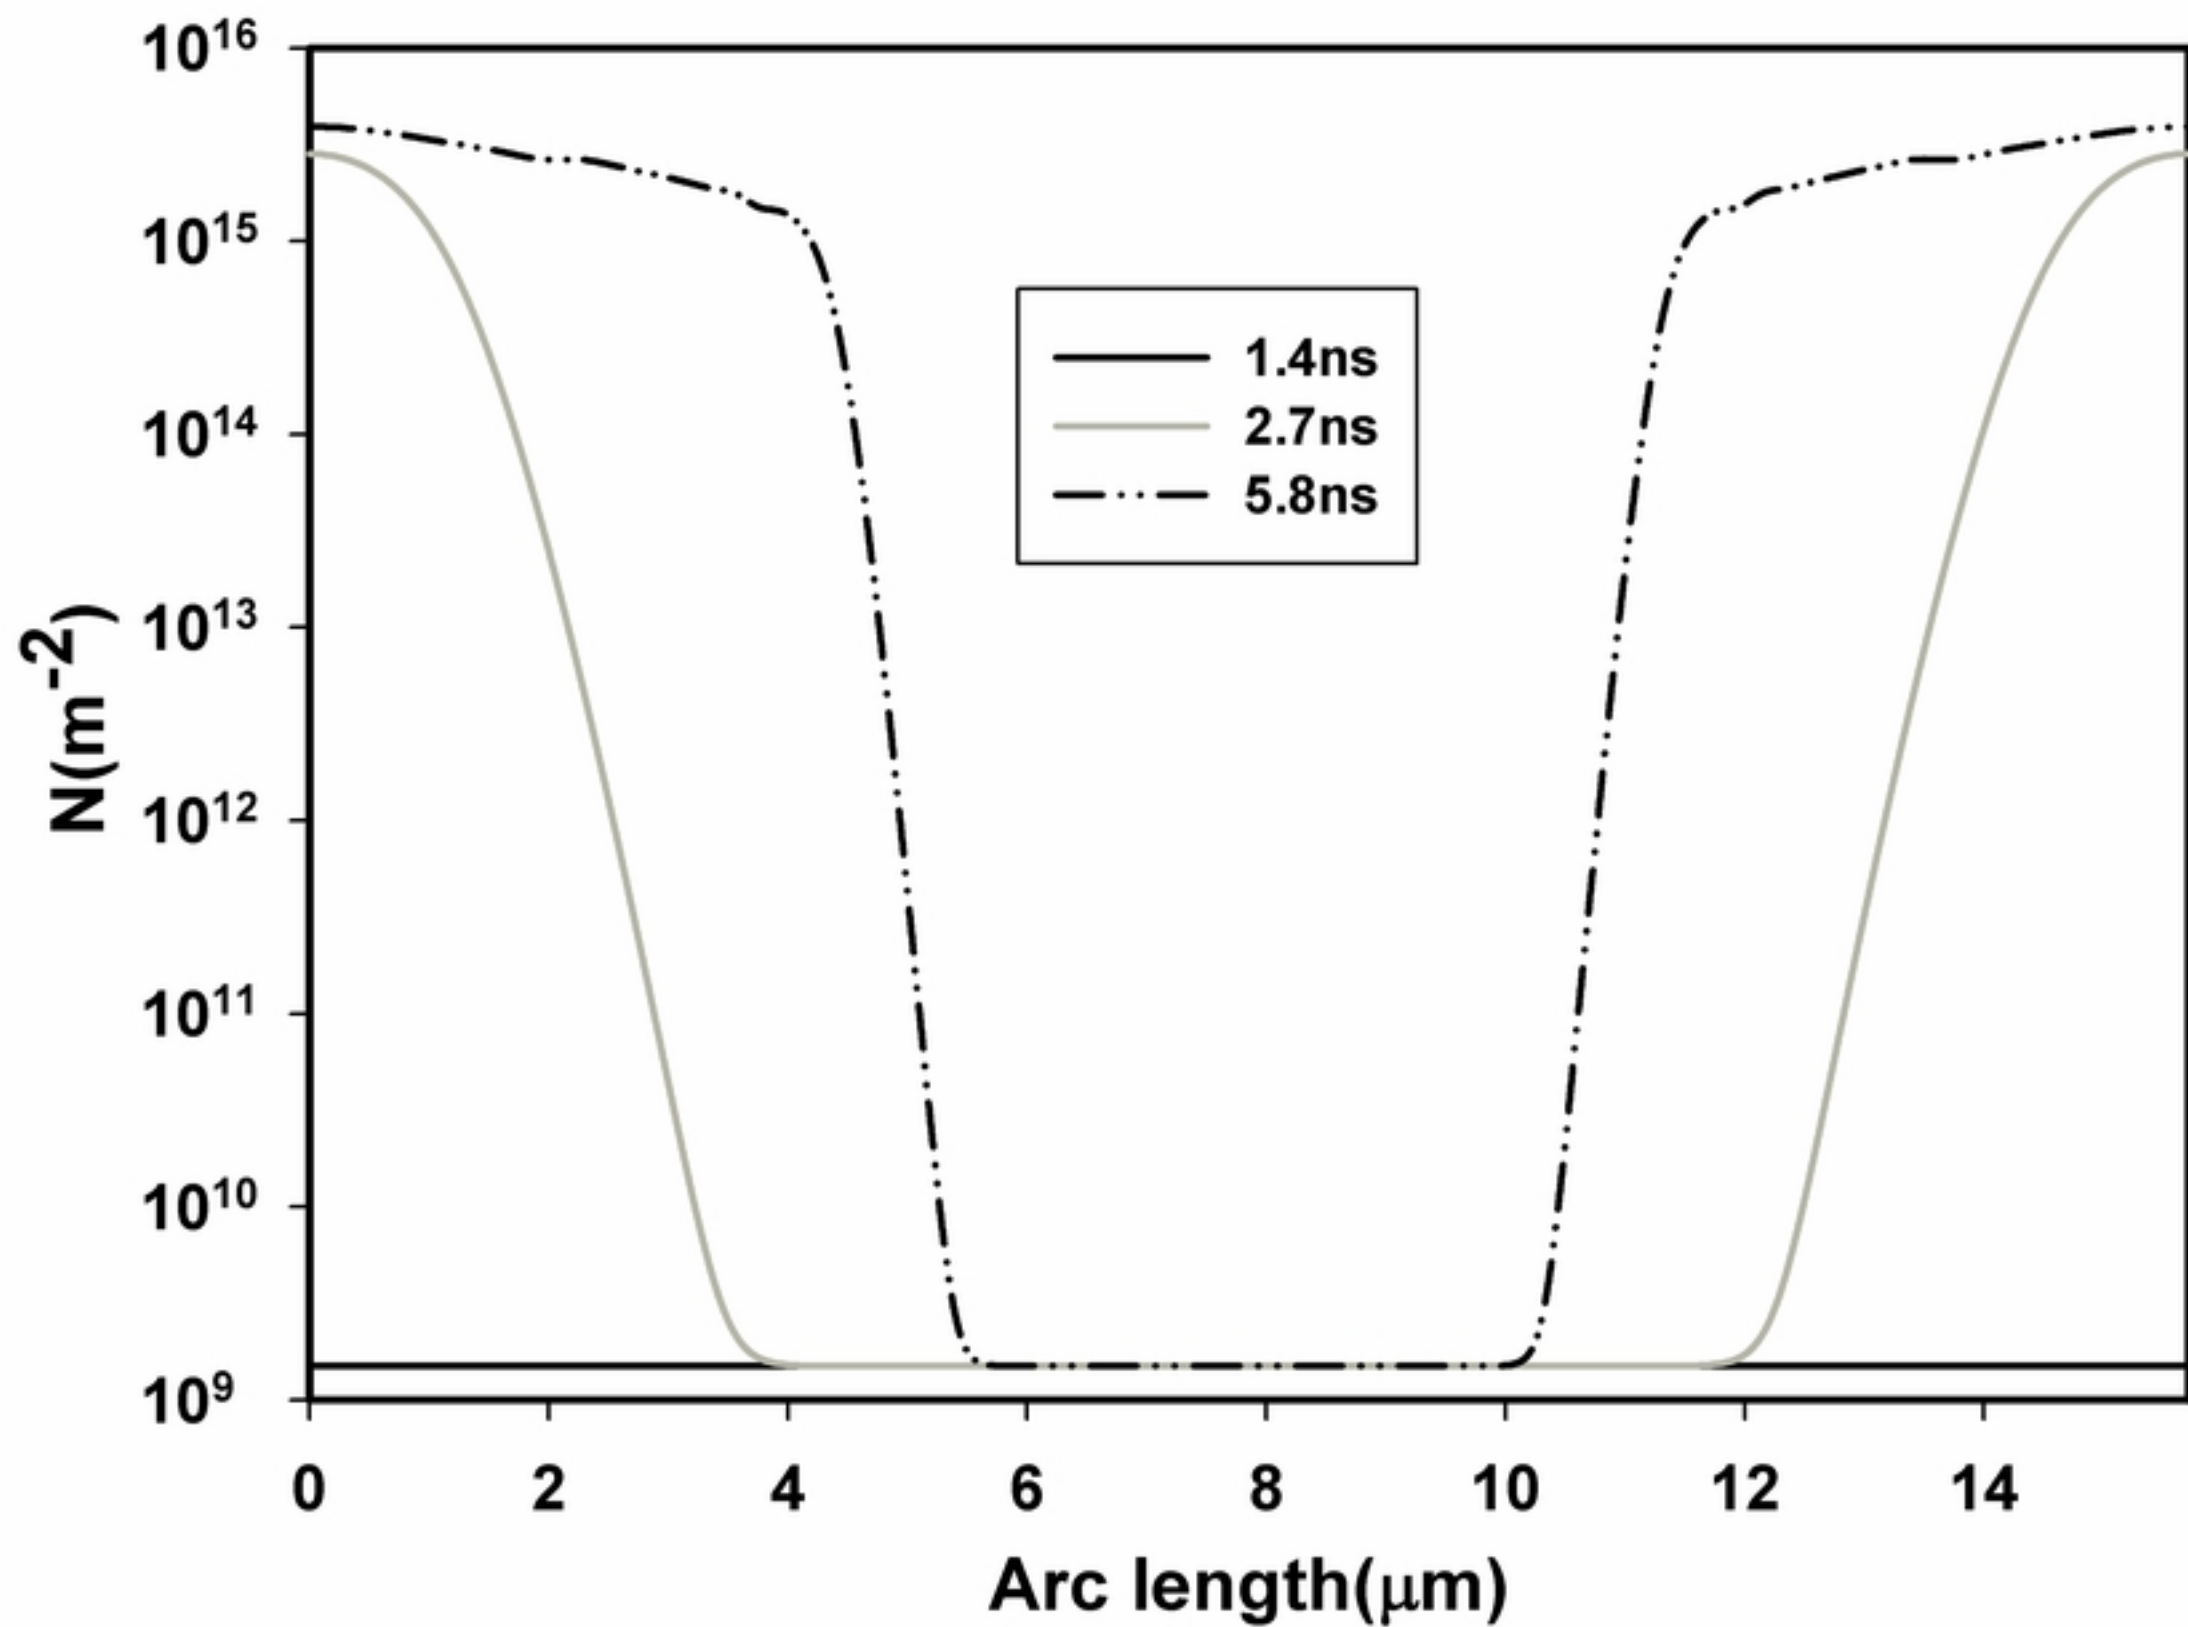

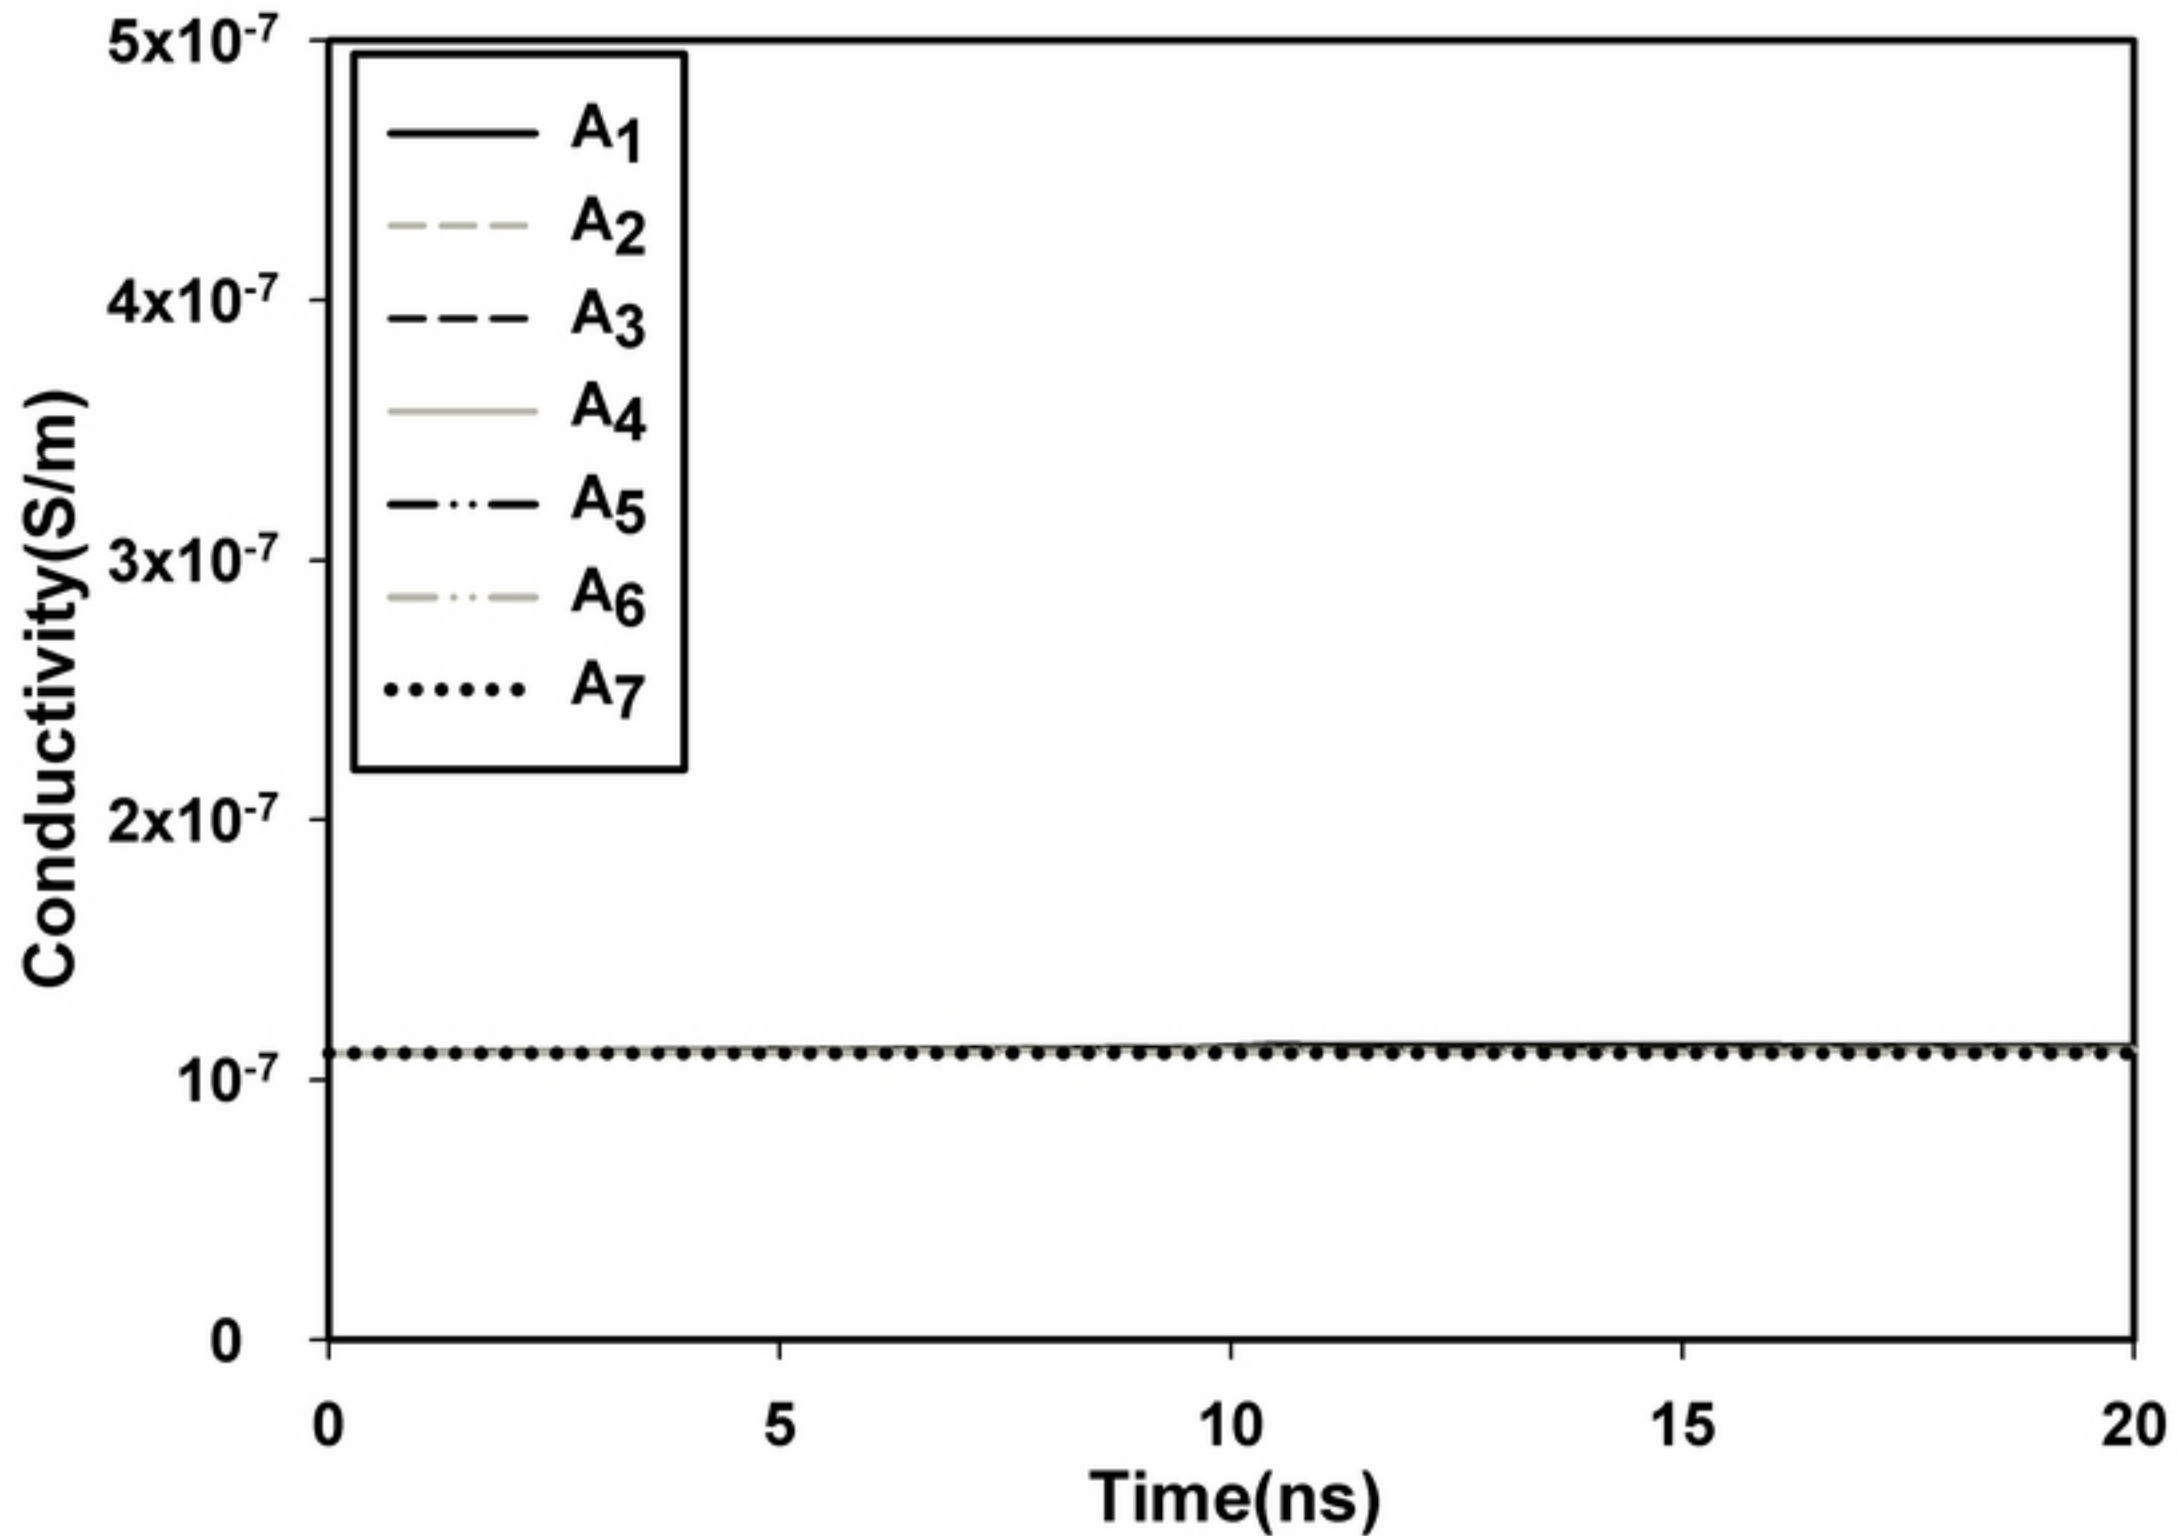

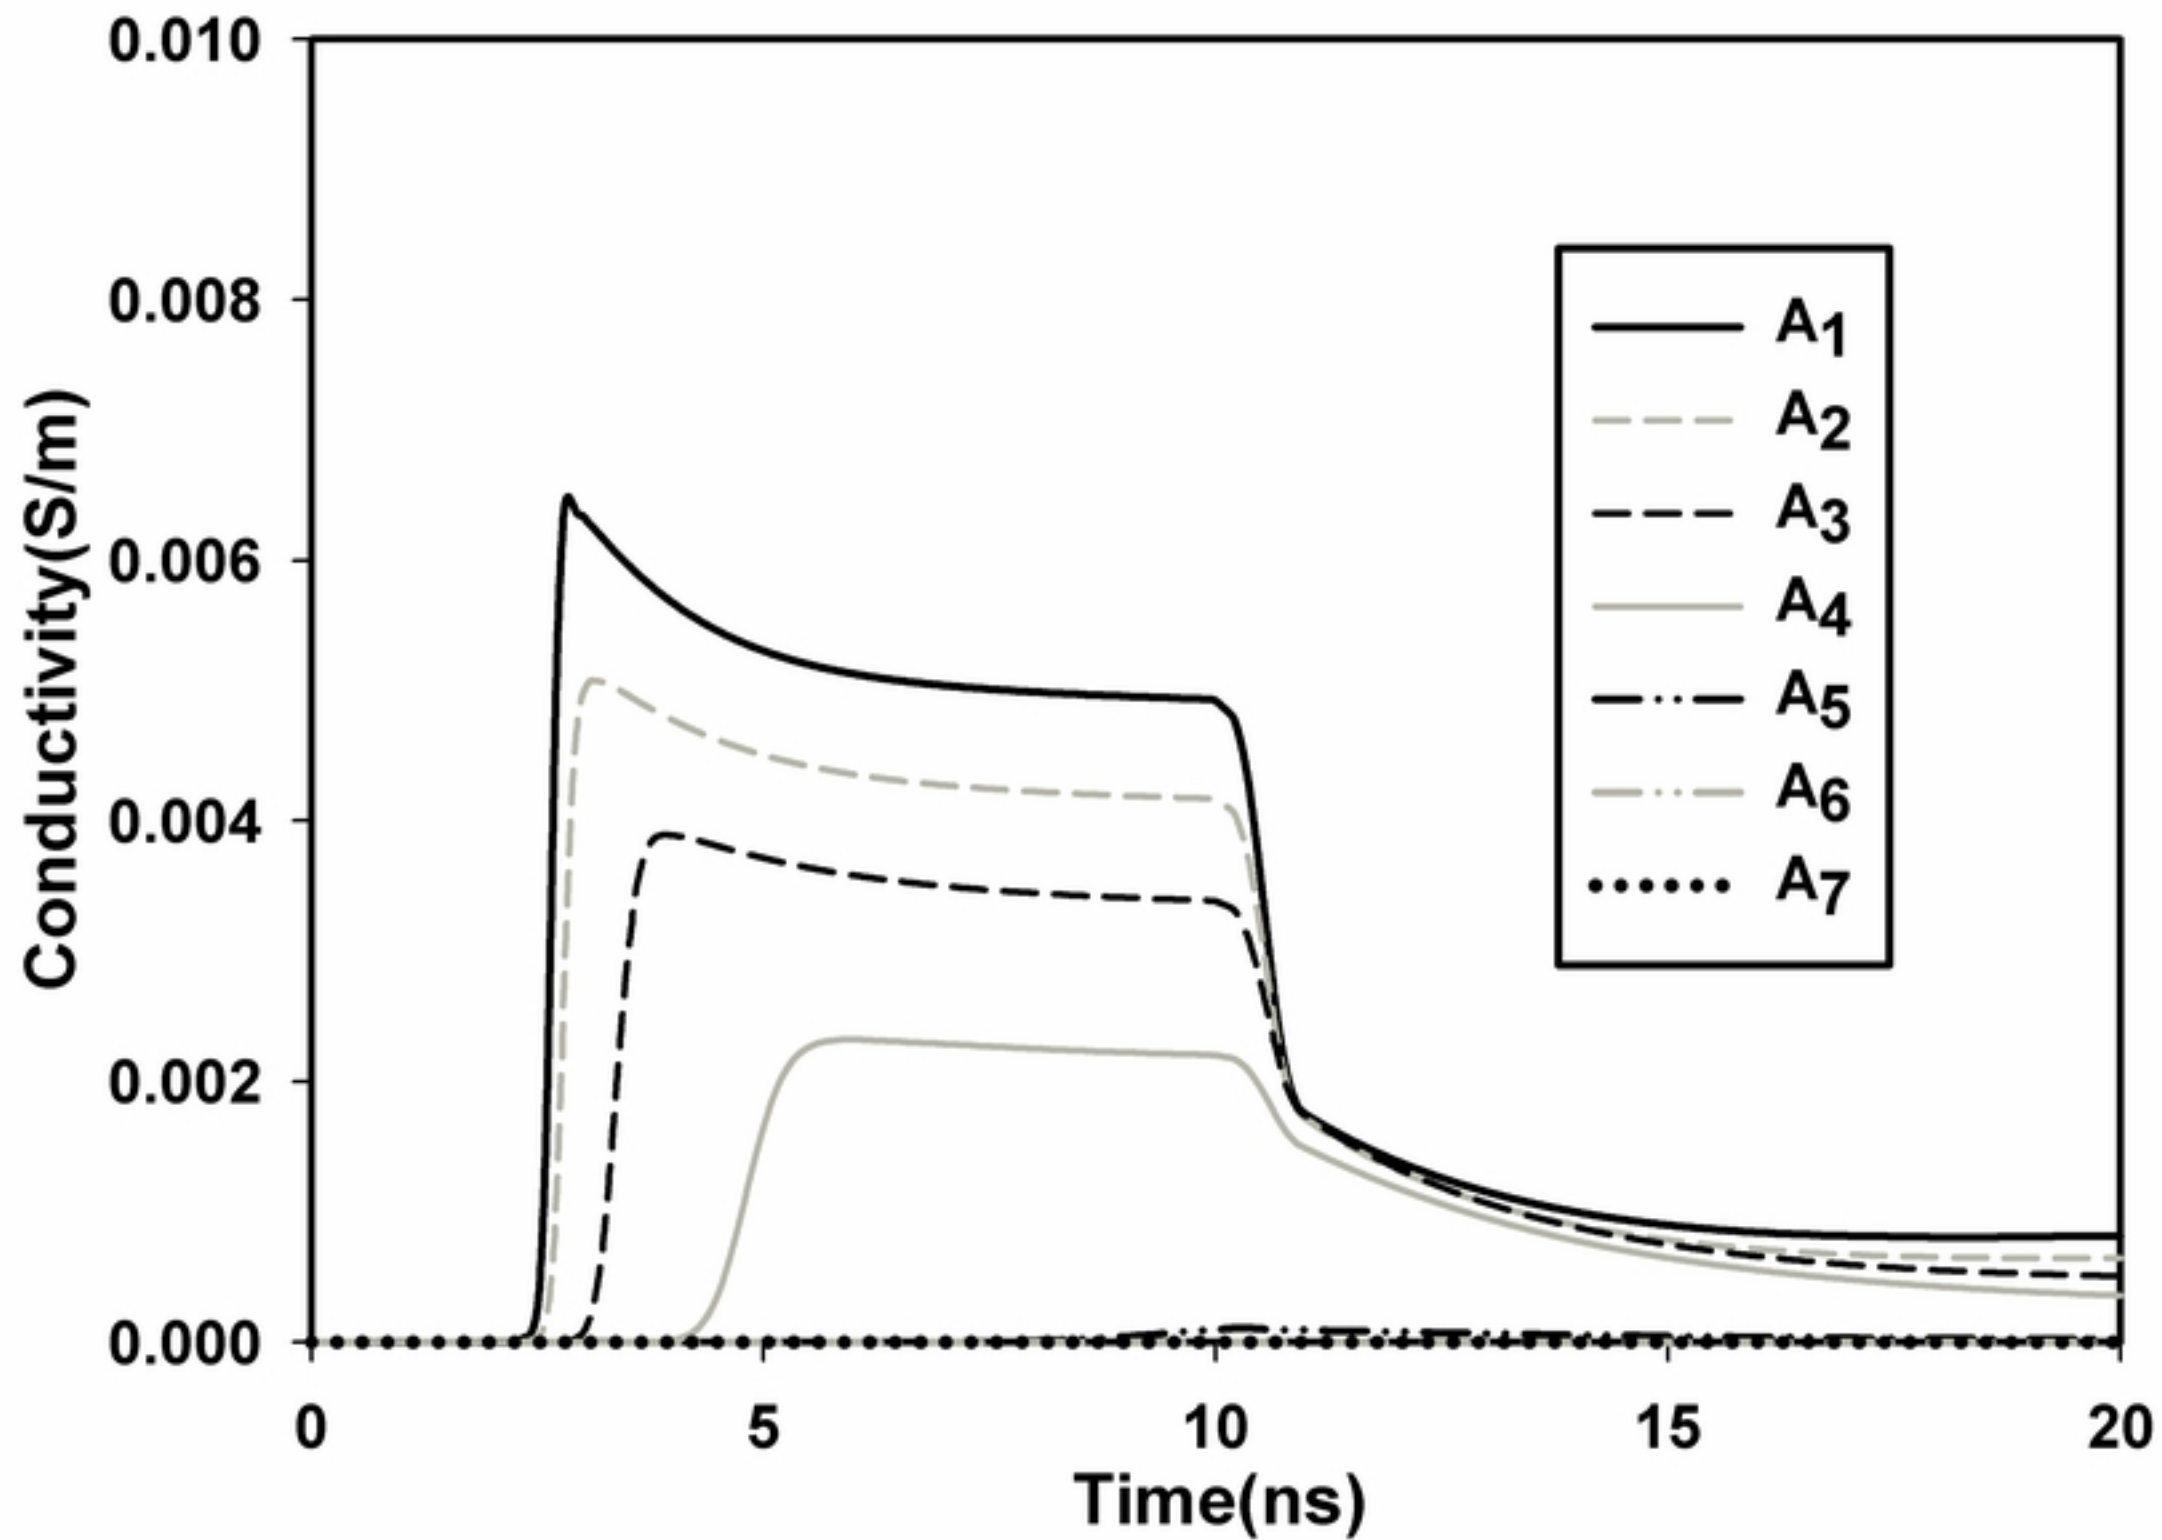

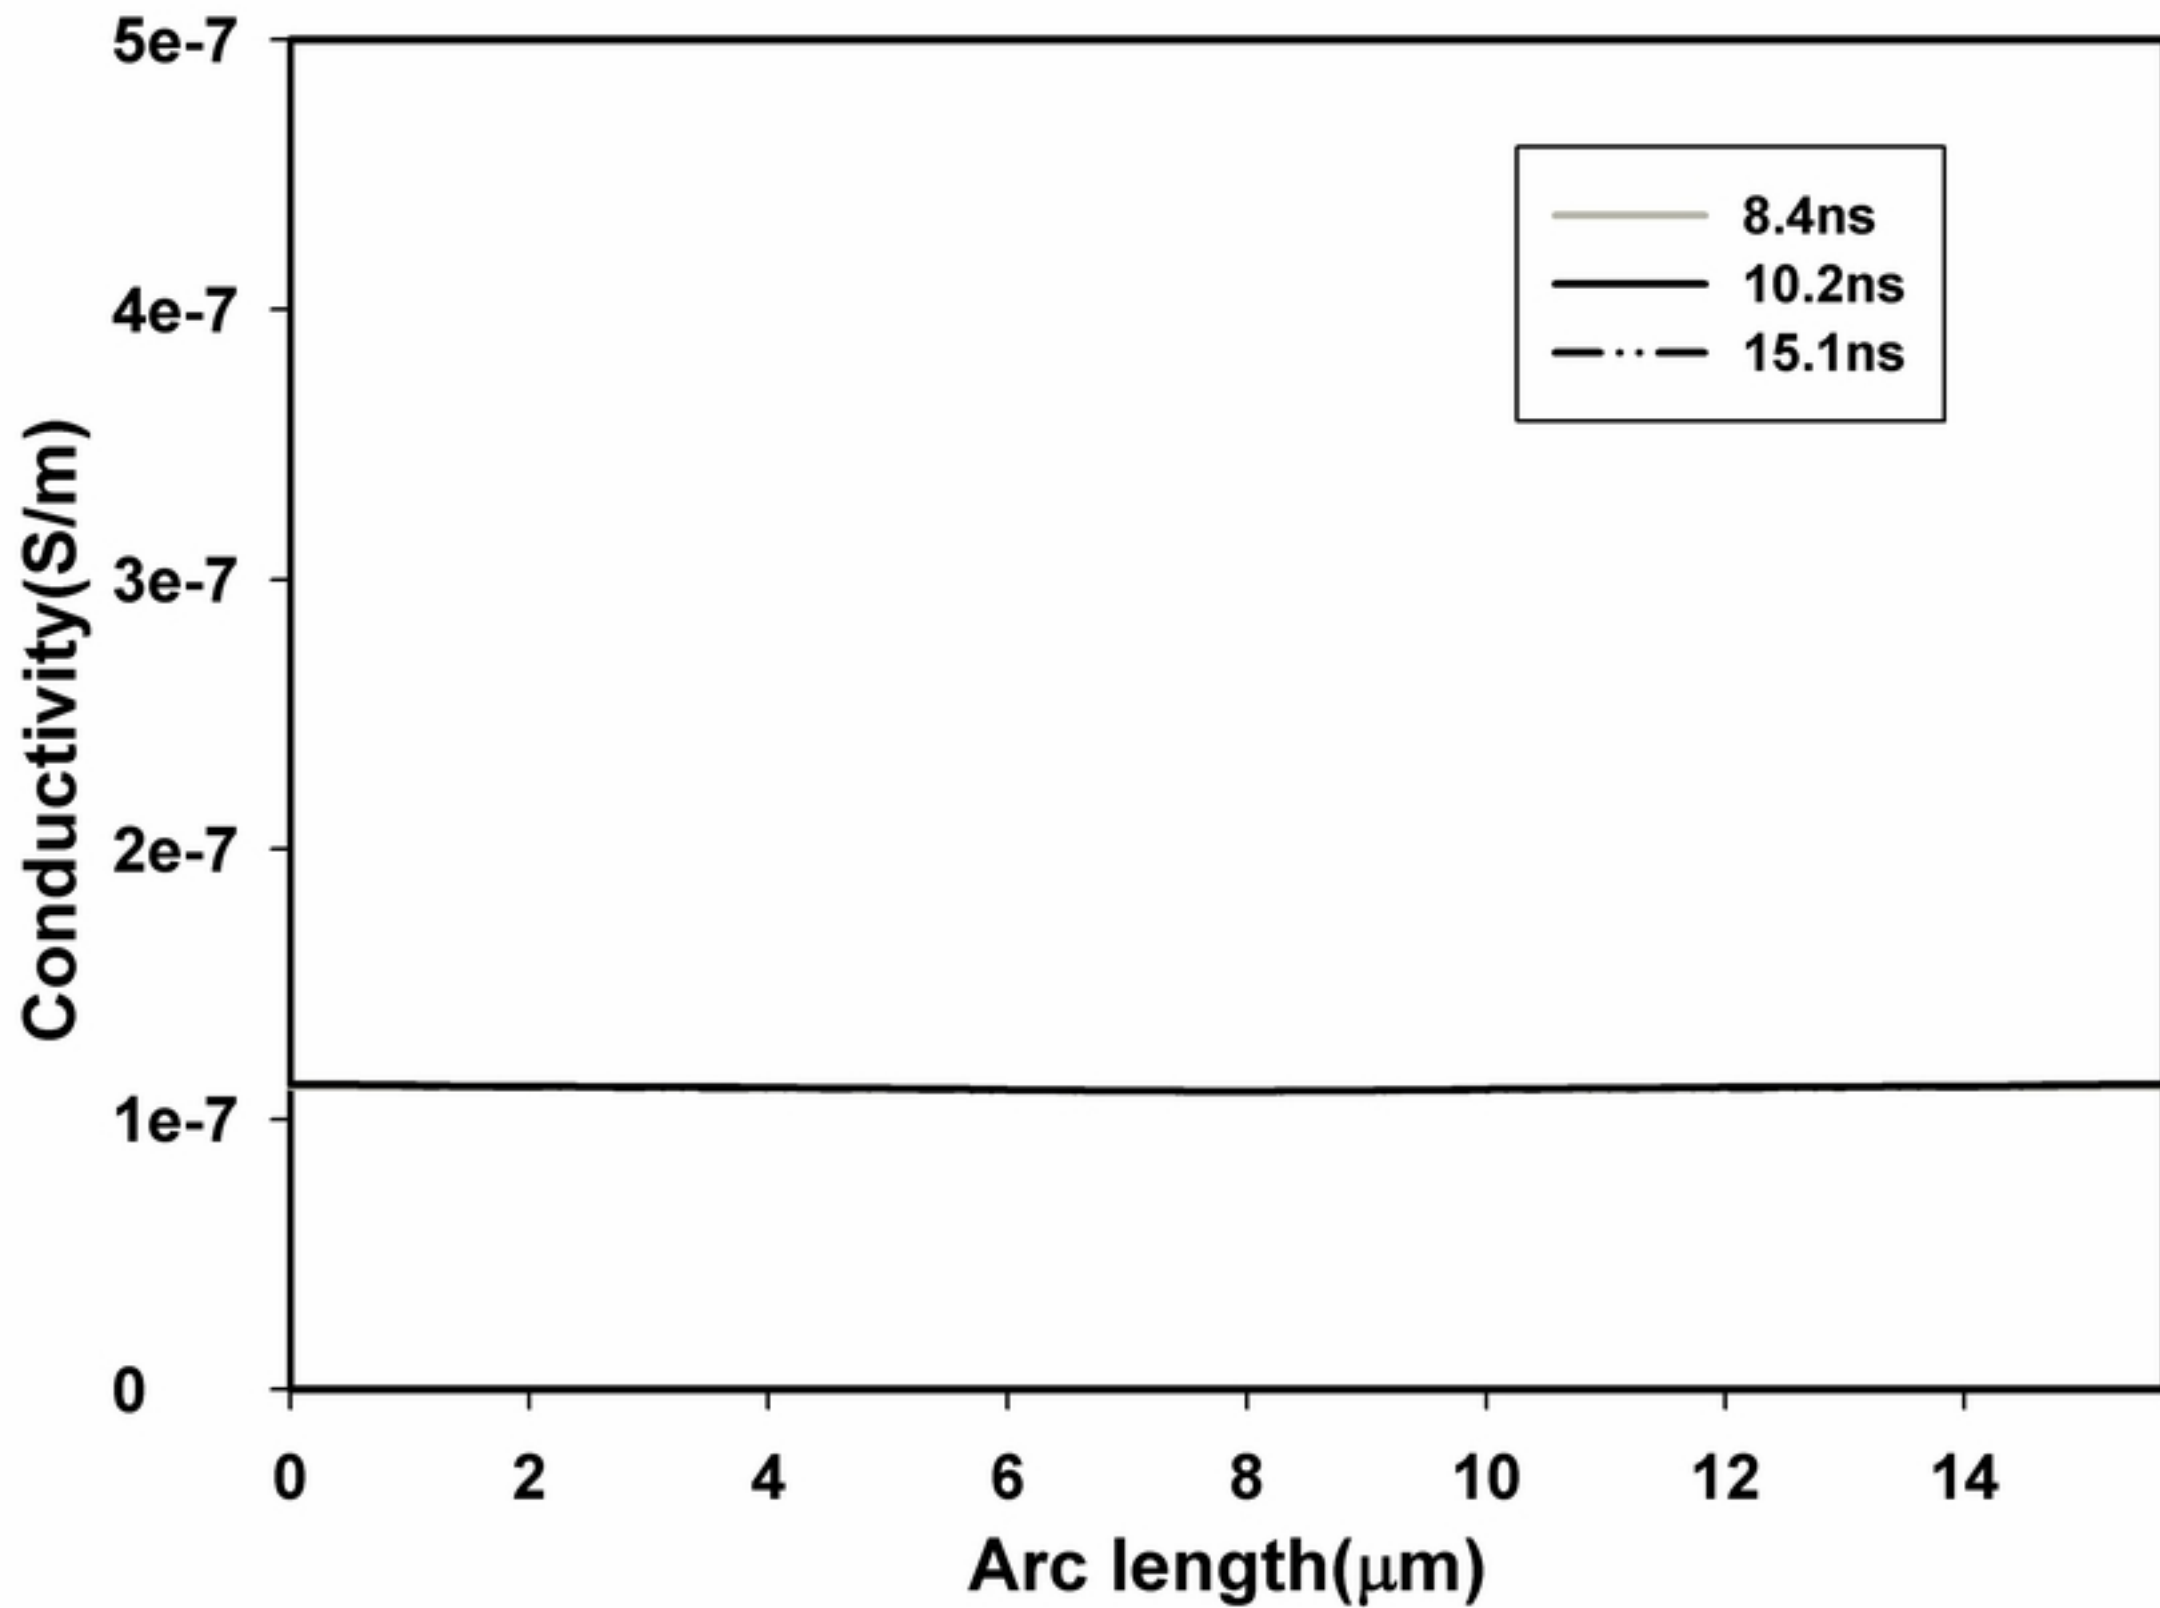



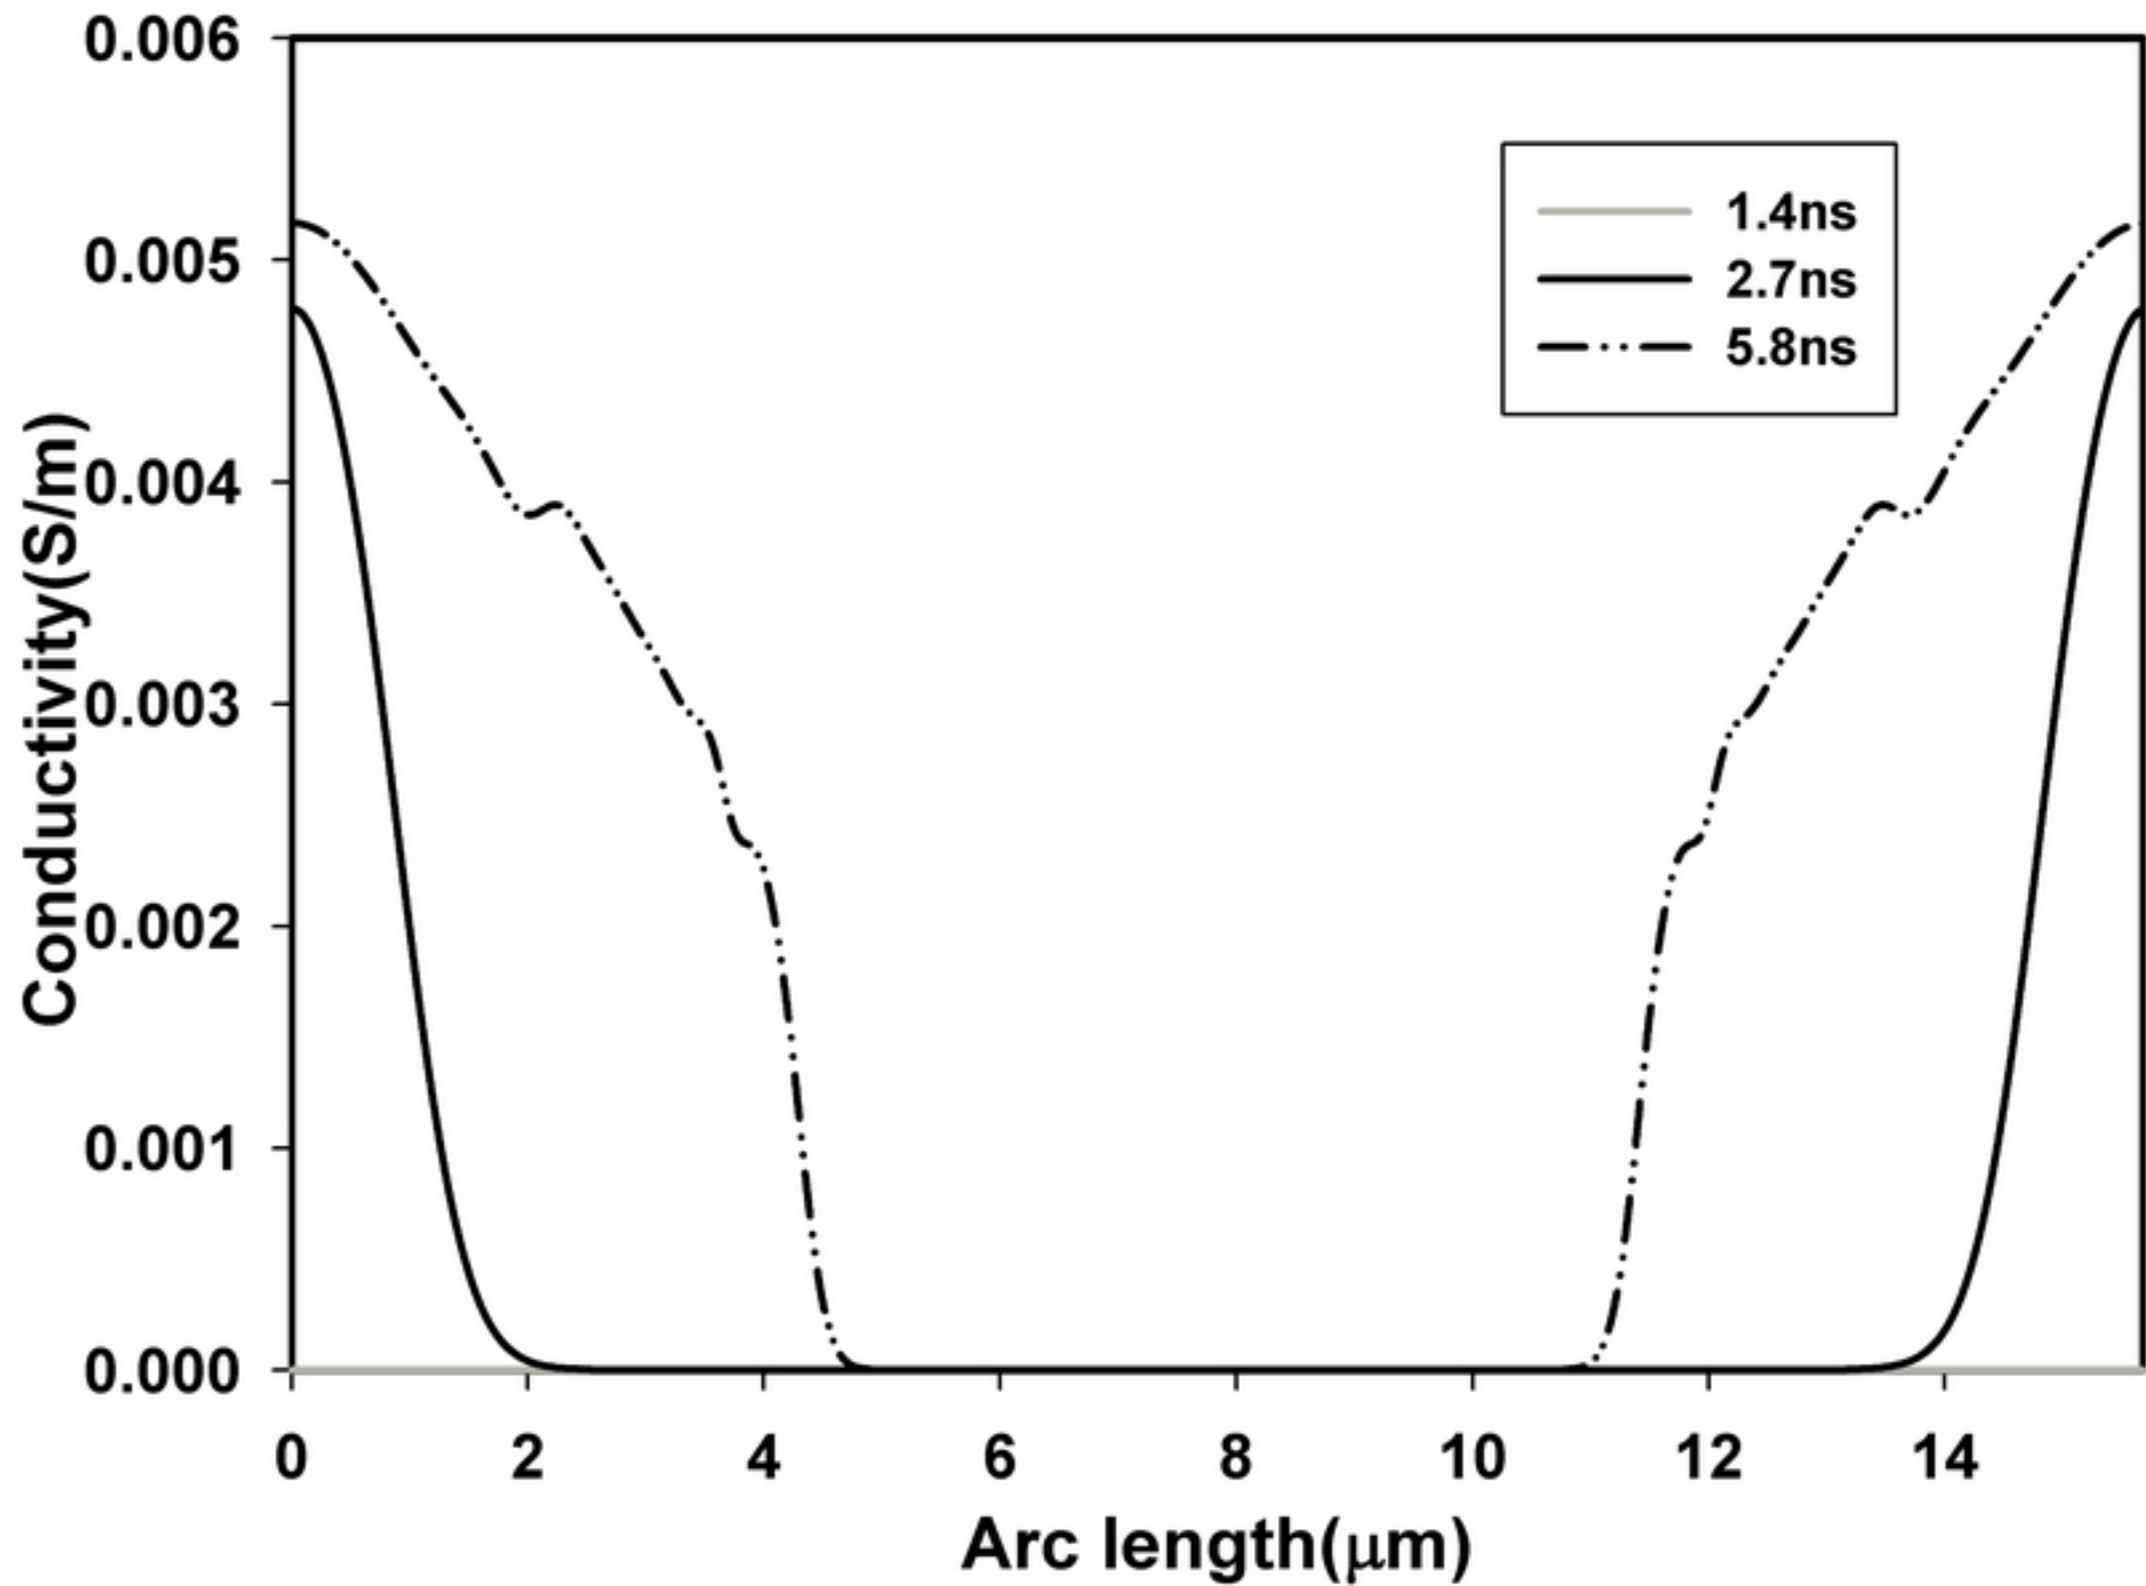

Source: https://www.biorxiv.org/content/10.1101/660134v1.full.pdf
